# Supplementary material
Source: publisher figshare collection journal article supplement (https://gsajournals.figshare.com/ndownloader/files/24159221)
Supplement: Supplementary file 1 [file 24159221]

## Sheet: Supplementary Table S2
Supplementary Table S2. Cleaned KASP genotypic data for 192 validation samples.
Sample	BBS_INDL1	BBS_INDL10_1	BBS_INDL10_2	BBS_INDL11_5	BBS_INDL12	BBS_INDL16	BBS_INDL18_1	BBS_INDL18_2	BBS_INDL2_2	BBS_INDL20_1	BBS_INDL20_3	BBS_INDL22_1	BBS_INDL22_2	BBS_INDL22_3	BBS_INDL23_1	BBS_INDL23_2	BBS_INDL23_3	BBS_INDL24_1	BBS_INDL24_2	BBS_INDL25	BBS_INDL27	BBS_INDL3	BBS_INDL30_1	BBS_INDL31	BBS_INDL32_1	BBS_INDL32_2	BBS_INDL36_1	BBS_INDL37_1	BBS_INDL37_2	BBS_INDL38_1	BBS_INDL38_3	BBS_INDL4_2	BBS_INDL41	BBS_INDL46	BBS_INDL62	BBS_INDL7	BBS_INDL75_1	BBS_INDL76_2	BBS_INDL77	BBS_INDL79	BBS_INDL9	BBS_SNP10_1	BBS_SNP10_2	BBS_SNP11	BBS_SNP19	BBS_SNP22	BBS_SNP23	BBS_SNP24	BBS_SNP28
A-1222-1	NA	ACCCCCCA:ACTCCCCCA	ACCCCCCCA:ACTCCCCCA	TGCTAAAT:TGCTAAAT	TGCTAAATTGAAAGGCTAATTACCATACGTGGTGGAAGATTGTAATCTCCAACAAA:TGCTAAATTGAAAGGCTAATTACCATACGTGGTGGAAGATTGTAATCTCCAACAAA	TCTTCAAAGAAG:TCTTCAAAGAAG	CT:CT	CT:CT	TACT:TACT	ACCTCCG:ACCTCCG	ACCTCCT:ACCTCCT	CAAC:CAAC	CGAG:CGAG	CGAC:CGAC	CAAAAAGAGT:CAAAAAGAGT	CAAAAGAGT:CAAAAGAGT	CGAAAGAGT:CGAAAGAGT	AA:CG	AG:AG	GTTAC:GTTAC	ATTGA:ATGA	GGA:GGA	GATATATATC:GGTATATATC	GT:GT	NA	GAA:GAA	ATAAAATAG:ATAAAATAG	CA:CA	CG:CG	CAT:CAT	CCT:CCT	GGA:GGA	CAACT:CAAACT	TCTTCAAAG:TCTTCAAAG	NA	TAAAAGAAGGT:TAAAAGAAGGT	ATCTTATAA:ATCTTATAA	AA	TCCCCTTCTCTCTCCG:TCCCCTTCTCTCTCCG	ATTAAA:ATTAAA	TAAGAAGT:TAAGAAGT	G:G	A:A	NA	A:G	T:A	G:G	A:A	G:G
A-1222-9	TAC:TAC	NA	NA	TGCTAAAT:TGCTAAAT	TGCTAAATTGAAAGGCTAATTACCATACGTGGTGGAAGATTGTAATCTCCAACAAA:TGCTAAATTGAAAGGCTAATTACCATACGTGGTGGAAGATTGTAATCTCCAACAAA	TTTTTAACCAAG:TCTTCAAAGAAG	NA	NA	TACT:TACT	ACCTCCG:ACCTCCG	NA	NA	CGAG:CGAG	NA	CAAAAAGAGT:CAAAAAGAGT	CAAAAGAGT:CAAAAGAGT	CGAAAGAGT:CGAAAGAGT	AA:CG	AG:AG	GTTAC:GTTAC	ATTGA:ATGA	GGA:GGA	GATATATATC:GATATATATC	NA	GAA:GAA	GAA:GAA	ATAAAATAG:ATAAAATAG	NA	NA	NA	CCT:CCT	GGA:GGA	CAACT:CAACT	NA	NA	TAAAAGAAGGT:TAAAAGAAGGT	NA	AA	TCCCCTTCTCTCTCCG:TCCCCTTCTCTCTCCG	NA	TAAGAAGT:TAAGAAGT	G:G	A:A	NA	A:G	A:A	G:G	A:A	G:G
A-1222-21	TAC:TAC	ACCCCCCA:ACTCCCCCA	ACCCCCCCA:ACTCCCCCA	TGCTAAAT:TGCTAAAT	TGCTAAATTGAAAGGCTAATTACCATACGTGGTGGAAGATTGTAATCTCCAACAAA:TGCTAAATTGAAAGGCTAATTACCATACGTGGTGGAAGATTGTAATCTCCAACAAA	TTTTTAACCAAG:TCTTCAAAGAAG	CT:CT	CT:CT	TACT:TACT	ACCTCCG:ACCTCCG	ACCTCCT:ACCTCCT	CAAC:CAAC	CGAG:CGAG	CGAC:CGAC	CAAAAAGAGT:CAAAAAGAGT	CAAAAGAGT:CAAAAGAGT	NA	AA:CG	AG:AG	GTTAC:GTTAC	ATTGA:ATGA	GGA:GGA	GATATATATC:GGTATATATC	AC:GT	GAA:GAA	GAA:GAA	ATAAAATAG:ATAAAATAG	CA:CA	CG:CG	CAT:CAT	CCT:CCT	GGA:GGA	CAACT:CAACT	TTTTTAACC:TCTTCAAAG	NA	TAAAAGAAGGT:TAAAAGAAGGT	ATCTTATAA:ATCTTATAA	AA	TCCCCTTCTCTCTCCG:TCCCCTTCTCTCTCCG	ATTAAA:ATTAAA	TAAGAAGT:TAAGAAGT	G:G	A:A	A:A	G:G	A:A	G:G	A:A	G:G
A-1222-24	NA	NA	NA	NA	NA	TTTTTAACCAAG:TCTTCAAAGAAG	NA	NA	NA	NA	NA	NA	NA	NA	NA	NA	NA	NA	NA	NA	NA	NA	NA	NA	NA	NA	NA	NA	NA	NA	NA	NA	NA	NA	NA	NA	NA	AA	NA	NA	NA	NA	NA	NA	NA	NA	NA	NA	NA
A-1222-27	TAC:TAC	ACCCCCCA:ACTCCCCCA	ACCCCCCCA:ACTCCCCCA	TGCTAAAT:TGCTAAAT	TGCTAAATTGAAAGGCTAATTACCATACGTGGTGGAAGATTGTAATCTCCAACAAA:TGCTAAATTGAAAGGCTAATTACCATACGTGGTGGAAGATTGTAATCTCCAACAAA	TTTTTAACCAAG:TCTTCAAAGAAG	CT:CT	CT:CT	TACT:TACT	ACCTCCG:ACCTCCG	NA	CAAC:CAAC	CGAG:CGAG	CGAC:CGAC	CAAAAAGAGT:CAAAAAGAGT	CAAAAGAGT:CAAAAGAGT	CGAAAGAGT:CGAAAGAGT	AA:CG	AG:AG	GTTAC:GTTAC	ATTGA:ATGA	GGA:GGA	GATATATATC:GATATATATC	AC:AC	GAA:GAA	GAA:GAA	ATAAAATAG:ATAAAATAG	CA:CA	CG:CG	CAT:CAT	CCT:CCT	GGA:GGA	CAACT:CAACT	TTTTTAACC:TCTTCAAAG	NA	TAAAAGAAGGT:TAAAAGAAGGT	ATCTTATAA:ATCTTATAA	AA	TCCCCTTCTCTCTCCG:TCCCCTTCTCTCTCCG	ATTAAA:ATTAAA	TAAGAAGT:TAAGAAGT	G:G	A:A	A:A	G:G	A:A	G:G	A:A	G:G
A-1222-28	NA	NA	NA	NA	NA	TTTTTAACCAAG:TCTTCAAAGAAG	NA	NA	NA	NA	NA	NA	NA	NA	NA	NA	NA	NA	AG:AG	GTTAC:GTTAC	NA	NA	NA	NA	GAA:GAA	GAA:GAA	NA	NA	NA	NA	NA	NA	NA	NA	NA	NA	NA	AA	NA	NA	NA	NA	NA	NA	NA	NA	NA	NA	G:G
A-1222-29	NA	NA	NA	NA	NA	NA	NA	NA	NA	NA	NA	NA	NA	NA	NA	NA	NA	NA	NA	GTTAC:GTTAC	NA	NA	NA	NA	GAA:GAA	NA	NA	NA	NA	NA	NA	NA	NA	NA	NA	NA	NA	NA	NA	NA	NA	NA	NA	NA	NA	NA	NA	NA	NA
A-1222-36	TAC:TAC	ACCCCCCA:ACTCCCCCA	ACCCCCCCA:ACTCCCCCA	TGCTAAAT:TGCTAAAT	TGCTAAATTGAAAGGCTAATTACCATACGTGGTGGAAGATTGTAATCTCCAACAAA:TGCTAAATTGAAAGGCTAATTACCATACGTGGTGGAAGATTGTAATCTCCAACAAA	TTTTTAACCAAG:TCTTCAAAGAAG	CT:CT	CT:CT	TACT:TACT	ACCTCCG:ACCTCCG	ACCTCCT:ACCTCCT	CAAC:CAAC	CGAG:CGAG	CGAC:CGAC	CAAAAAGAGT:CAAAAAGAGT	CAAAAGAGT:CAAAAGAGT	CGAAAGAGT:CGAAAGAGT	AA:CG	AG:AG	GTTAC:GTTAC	ATTGA:ATGA	GGA:GGA	GATATATATC:GATATATATC	AC:AC	GAA:GAA	GAA:GAA	ATAAAATAG:ATAAAATAG	CA:CA	CG:CG	CAT:CAT	CCT:CCT	GGA:GGA	CAACT:CAACT	TTTTTAACC:TCTTCAAAG	NA	TAAAAGAAGGT:TAAAAGAAGGT	ATCTTATAA:ATCTTATAA	AA	TCCCCTTCTCTCTCCG:TCCCCTTCTCTCTCCG	ATTAAA:ATTAAA	TAAGAAGT:TAAGAAGT	G:G	A:A	A:A	G:G	A:A	G:G	A:A	G:G
A-1222-42	TAC:TAC	ACCCCCCA:ACTCCCCCA	ACCCCCCCA:ACTCCCCCA	TGCTAAAT:TGCTAAAT	TGCTAAATTGAAAGGCTAATTACCATACGTGGTGGAAGATTGTAATCTCCAACAAA:TGCTAAATTGAAAGGCTAATTACCATACGTGGTGGAAGATTGTAATCTCCAACAAA	TCTTCAAAGAAG:TCTTCAAAGAAG	CT:CT	CT:CT	TACT:TACT	ACCTCCG:ACCTCCG	ACCTCCT:ACCTCCT	CAAC:CAAC	CGAG:CGAG	CGAC:CGAC	CAAAAAGAGT:CAAAAAGAGT	CAAAAGAGT:CAAAAGAGT	NA	AA:CG	AG:AG	GTTAC:GTTAC	ATTGA:ATGA	GGA:GGA	GATATATATC:GGTATATATC	GT:GT	GAA:GAA	GAA:GAA	ATAAAATAG:ATAAAATAG	CA:CA	CG:CG	CAT:CAT	CCT:CCT	GGA:GGA	CAACT:CAACT	TCTTCAAAG:TCTTCAAAG	NA	TAAAAGAAGGT:TAAAAGAAGGT	ATCTTATAA:ATCTTATAA	AA	TCCCCTTCTCTCTCCG:TCCCCTTCTCTCTCCG	ATTAAA:ATTAAA	TAAGAAGT:TAAGAAGT	G:G	A:A	A:A	A:G	T:A	G:G	A:A	G:G
A-1222-44	TAC:TAC	ACCCCCCA:ACTCCCCCA	ACCCCCCCA:ACTCCCCCA	TGCTAAAT:TGCTAAAT	NA	TCTTCAAAGAAG:TCTTCAAAGAAG	NA	CT:CT	TACT:TACT	ACCTCCG:ACCTCCG	NA	NA	CGAG:CGAG	NA	CAAAAAGAGT:CAAAAAGAGT	NA	CGAAAGAGT:CGAAAGAGT	AA:CG	AG:AG	GTTAC:GTTAC	ATTGA:ATGA	GGA:GGA	GATATATATC:GATATATATC	NA	GAA:GAA	GAA:GAA	ATAAAATAG:ATAAAATAG	NA	NA	NA	CCT:CCT	GGA:GGA	CAACT:CAACT	NA	NA	TAAAAGAAGGT:TAAAAGAAGGT	ATCTTATAA:ATCTTATAA	AA	TCCCCTTCTCTCTCCG:TCCCCTTCTCTCTCCG	ATTAAA:ATTAAA	TAAGAAGT:TAAGAAGT	G:G	NA	NA	A:G	A:A	G:G	A:A	G:G
A-1229-5	TAA:TAC	ACCCCCCA:ACTCCCCCA	ACCCCCCCA:ACTCCCCCA	TGCTAAAT:TGCTAAAT	TGCTAAATTGAAAGGCTAATTACCATACGTGGTGGAAGATTGTAATCTCCAACAAA:TGCTAAATTGAAAGGCTAATTACCATACGTGGTGGAAGATTGTAATCTCCAACAAA	TTTTTAACCAAG:TCTTCAAAGAAG	CT:CT	CT:CT	TACT:TACT	ACCTCCG:ACCTCCG	ACCTCCT:GCCTTCA	CAAC:CAAC	CGAG:CGAG	CGAC:CGAC	CAAAAAGAGT:CAAAAAGAGT	CAAAAGAGT:CAAAAGAGT	CGAAAGAGT:CGAAAGAGT	AA:CG	AG:AG	GTTAC:GTTAC	ATTGA:ATGA	GGA:GGA	GATATATATC:GATATATATC	AC:AC	GAA:GAA	GAA:GAA	ATAAAATAG:ATAAAATAG	CA:CA	CG:CG	CAT:CAT	CCT:CCT	GGA:GGA	CAACT:CAAACT	TTTTTAACC:TCTTCAAAG	GCTTTGCC:GCTTTGCC	TAAAAGAAGGT:TAAAAGAAGGT	ATCTTATAA:ATCTTATAA	AA	TCCCCTTCTCTCTCCG:TCCCCTTCTCTCTCCG	ATTAAA:ATTAAA	TAAGAAGT:TAAGAAGT	G:G	A:A	A:A	A:G	A:A	NA	A:A	G:G
A-1229-7	NA	ACCCCCCA:ACTCCCCCA	ACCCCCCCA:ACTCCCCCA	TGCTAAAT:TGCTAAAT	TGCTAAATTGAAAGGCTAATTACCATACGTGGTGGAAGATTGTAATCTCCAACAAA:TGCTAAATTGAAAGGCTAATTACCATACGTGGTGGAAGATTGTAATCTCCAACAAA	TTTTTAACCAAG:TCTTCAAAGAAG	CT:CT	CT:CT	TACT:TACT	ACCTCCG:ACCTCCG	ACCTCCT:ACCTCCT	CAAC:CAAC	CGAG:CGAG	CGAC:CGAC	CAAAAAGAGT:CAAAAAGAGT	CAAAAGAGT:CAAAAGAGT	CGAAAGAGT:CGAAAGAGT	AA:CG	AG:AG	GTTAC:GTTAC	ATTGA:ATGA	GGA:GGA	GATATATATC:GATATATATC	AC:AC	GAA:GAA	GAA:GAA	ATAAAATAG:ATAAAATAG	CA:CA	CG:CG	CAT:CAT	CCT:CCT	GGA:GGA	CAACT:CAAACT	TTTTTAACC:TCTTCAAAG	GC:GCTTTGCC	TAAAAGAAGGT:TAAAAGAAGGT	ATCTTATAA:ATCTTATAA	AA	TCCCCTTCTCTCTCCG:TCCCCTTCTCTCTCCG	ATTAAA:ATTAAA	TAAGAAGT:TAAGAAGT	G:G	A:A	A:A	G:G	A:A	G:G	A:A	G:G
A-1229-9	NA	ACCCCCCA:ACTCCCCCA	ACCCCCCCA:ACTCCCCCA	TGCTAAAT:TGCTAAAT	TGCTAAATTGAAAGGCTAATTACCATACGTGGTGGAAGATTGTAATCTCCAACAAA:TGCTAAATTGAAAGGCTAATTACCATACGTGGTGGAAGATTGTAATCTCCAACAAA	TTTTTAACCAAG:TCTTCAAAGAAG	CT:CT	CT:CT	TACT:TACT	ACCTCCG:ACCTCCG	ACCTCCT:GCCTTCA	CAAC:CAAC	CGAG:CGAG	CGAC:CGAC	CAAAAAGAGT:CAAAAAGAGT	CAAAAGAGT:CAAAAGAGT	NA	AA:CG	AG:AG	GTTAC:GTTAC	ATTGA:ATGA	GGA:GGA	GATATATATC:GGTATATATC	AC:GT	GAA:GAA	GAA:GAA	NA	CA:CA	CG:CG	CAT:CAT	CCT:CCT	GGA:GGA	CAACT:CAAACT	TTTTTAACC:TCTTCAAAG	GC:GCTTTGCC	TAAAAGAAGGT:TAAAAGAAGGT	ATCTTATAA:ATCTTATAA	AA	TCCCCTTCTCTCTCCG:TCCCCTTCTCTCTCCG	ATTAAA:ATTAAA	TAAGAAGT:TAAGAAGT	G:G	A:A	A:A	A:G	A:A	G:G	A:A	G:G
A-1229-12	NA	ACCCCCCA:ACTCCCCCA	ACCCCCCCA:ACTCCCCCA	TGCTAAAT:TGCTAAAT	TGCTAAATTGAAAGGCTAATTACCATACGTGGTGGAAGATTGTAATCTCCAACAAA:TGCTAAATTGAAAGGCTAATTACCATACGTGGTGGAAGATTGTAATCTCCAACAAA	TTTTTAACCAAG:TCTTCAAAGAAG	CT:CT	CT:CT	TACT:TACT	ACCTCCG:ACCTCCG	ACCTCCT:ACCTCCT	CAAC:CAAC	CGAG:CGAG	CGAC:CGAC	CAAAAAGAGT:CAAAAAGAGT	CAAAAGAGT:CAAAAGAGT	NA	AA:CG	AG:AG	GTTAC:GTTAC	ATTGA:ATGA	GGA:GGA	GATATATATC:GATATATATC	AC:AC	GAA:GAA	GAA:GAA	ATAAAATAG:ATAAAATAG	CA:CA	CG:CG	CAT:CAT	CCT:CCT	GGA:GGA	CAACT:CAAACT	TTTTTAACC:TCTTCAAAG	GC:GCTTTGCC	TAAAAGAAGGT:TAAAAGAAGGT	ATCTTATAA:ATCTTATAA	AA	TCCCCTTCTCTCTCCG:TCCCCTTCTCTCTCCG	ATTAAA:ATTAAA	TAAGAAGT:TAAGAAGT	G:G	A:A	A:A	A:G	A:A	G:G	A:A	G:G
A-1229-13	NA	NA	NA	NA	NA	NA	NA	NA	NA	NA	NA	NA	NA	NA	NA	NA	NA	NA	NA	NA	NA	NA	NA	NA	NA	NA	NA	NA	NA	NA	NA	NA	NA	NA	NA	NA	NA	AA	NA	NA	NA	NA	NA	NA	NA	NA	NA	NA	NA
A-1229-14	TAA:TAC	ACTCCCCCA:ACTCCCCCA	NA	TGCTAAAT:TGCTAAAT	TGCTAAATTGAAAGGCTAATTACCATACGTGGTGGAAGATTGTAATCTCCAACAAA:TGCTAAATTGAAAGGCTAATTACCATACGTGGTGGAAGATTGTAATCTCCAACAAA	TTTTTAACCAAG:TCTTCAAAGAAG	NA	CT:CT	TACT:TACT	ACCTCCG:ACCTCCG	NA	NA	CGAG:CGAG	CGAC:CGAC	CAAAAAGAGT:CAAAAAGAGT	CAAAAGAGT:CAAAAGAGT	CGAAAGAGT:CGAAAGAGT	AA:CG	AG:AG	GTTAC:GTTAC	ATTGA:ATGA	GGA:GGA	GATATATATC:GATATATATC	AC:AC	GAA:GAA	GAA:GAA	ATAAAATAG:ATAAAATAG	CA:CA	CG:CG	CAT:CAT	CCT:CCT	GGA:GGA	NA	NA	NA	TAAAAGAAGGT:TAAAAGAAGGT	ATCTTATAA:ATCTTATAA	AA	TCCCCTTCTCTCTCCG:TCCCCTTCTCTCTCCG	ATTAAA:ATTAAA	TAAGAAGT:TAAGAAGT	G:G	A:A	NA	A:G	A:A	G:G	NA	G:G
A-1229-15	TAA:TAA	ACTCCCCCA:ACTCCCCCA	ACTCCCCCA:ACTCCCCCA	TGCTAAAT:TGCTAAAT	TGCTAAATTGAAAGGCTAATTACCATACGTGGTGGAAGATTGTAATCTCCAACAAA:TGCTAAATTGAAAGGCTAATTACCATACGTGGTGGAAGATTGTAATCTCCAACAAA	TTTTTAACCAAG:TCTTCAAAGAAG	CT:CT	CT:CT	TACT:TACT	ACCTCCG:ACCTCCG	ACCTCCT:ACCTCCT	CAAC:CAAC	CGAG:CGAG	CGAC:CGAC	CAAAAAGAGT:CAAAAAGAGT	CAAAAGAGT:CAAAAGAGT	CGAAAGAGT:CGAAAGAGT	AA:CG	AG:AG	GTTAC:GTTAC	ATTGA:ATTGA	GGA:GGA	GATATATATC:GGTATATATC	AC:GT	GAA:GAA	GAA:GAA	ATAAAATAG:ATAAAATAG	CA:CA	CG:CG	CAT:CAT	CCT:CCT	GGA:GGA	CAACT:CAAACT	TTTTTAACC:TCTTCAAAG	GC:GCTTTGCC	TAAAAGAAGGT:TAAAAGAAGGT	ATCTTATAA:ATCTTATAA	AA	TCCCCTTCTCTCTCCG:TCCCCTTCTCTCTCCG	ATTAAA:ATTAAA	TAAGAAGT:TAAGAAGT	G:G	A:A	A:A	A:G	A:A	G:G	A:A	G:G
A-1229-16	NA	ACTCCCCCA:ACTCCCCCA	ACTCCCCCA:ACTCCCCCA	TGCTAAAT:TGCTAAAT	TGCTAAATTGAAAGGCTAATTACCATACGTGGTGGAAGATTGTAATCTCCAACAAA:TGCTAAATTGAAAGGCTAATTACCATACGTGGTGGAAGATTGTAATCTCCAACAAA	TTTTTAACCAAG:TCTTCAAAGAAG	CT:CT	CT:CT	TACT:TACT	ACCTCCG:ACCTCCG	ACCTCCT:ACCTCCT	CAAC:CAAC	CGAG:CGAG	CGAC:CGAC	CAAAAAGAGT:CAAAAAGAGT	CAAAAGAGT:CAAAAGAGT	NA	AA:CG	AG:AG	GTTAC:GTTAC	ATTGA:ATGA	GGA:GGA	GATATATATC:GATATATATC	AC:AC	GAA:GAA	GAA:GAA	ATAAAATAG:ATAAAATAG	NA	CG:CG	CAT:CAT	CCT:CCT	GGA:GGA	CAACT:CAAACT	TTTTTAACC:TCTTCAAAG	GCTTTGCC:GCTTTGCC	TAAAAGAAGGT:TAAAAGAAGGT	ATCTTATAA:ATCTTATAA	AA	TCCCCTTCTCTCTCCG:TCCCCTTCTCTCTCCG	ATTAAA:ATTAAA	TAAGAAGT:TAAGAAGT	G:G	A:A	A:A	G:G	A:A	G:G	A:A	G:G
A-1229-17	TAA:TAC	ACTCCCCCA:ACTCCCCCA	ACTCCCCCA:ACTCCCCCA	TGCTAAAT:TGCTAAAT	TGCTAAATTGAAAGGCTAATTACCATACGTGGTGGAAGATTGTAATCTCCAACAAA:TGCTAAATTGAAAGGCTAATTACCATACGTGGTGGAAGATTGTAATCTCCAACAAA	TTTTTAACCAAG:TCTTCAAAGAAG	CT:CT	CT:CT	TACT:TACT	ACCTCCG:ACCTCCG	GCCTTCA:GCCTTCA	CAAC:CAAC	CGAG:CGAG	CGAC:CGAC	CAAAAAGAGT:CAAAAAGAGT	CAAAAGAGT:CAAAAGAGT	NA	AA:CG	AG:AG	GTTAC:GTTAC	ATTGA:ATGA	GGA:GGA	GATATATATC:GGTATATATC	AC:GT	GAA:GAA	GAA:GAA	ATAAAATAG:ATAAAATAG	CA:CA	CG:CG	CAT:CAT	CCT:CCT	GGA:GGA	CAACT:CAAACT	TTTTTAACC:TCTTCAAAG	NA	TAAAAGAAGGT:TAAAAGAAGGT	ATCTTATAA:ATCTTATAA	AA	TCCCCTTCTCTCTCCG:TCCCCTTCTCTCTCCG	ATTAAA:ATTAAA	TAAGAAGT:TAAGAAGT	G:G	A:A	A:A	A:G	A:A	G:G	A:A	G:G
A-1229-18	TAA:TAA	ACCCCCCA:ACTCCCCCA	ACCCCCCCA:ACTCCCCCA	TGCTAAAT:TGCTAAAT	TGCTAAATTGAAAGGCTAATTACCATACGTGGTGGAAGATTGTAATCTCCAACAAA:TGCTAAATTGAAAGGCTAATTACCATACGTGGTGGAAGATTGTAATCTCCAACAAA	TTTTTAACCAAG:TCTTCAAAGAAG	CT:CT	CT:CT	TACT:TACT	ACCTCCG:ACCTCCG	ACCTCCT:ACCTCCT	CAAC:CAAC	CGAG:CGAG	CGAC:CGAC	CAAAAAGAGT:CAAAAAGAGT	CAAAAGAGT:CAAAAGAGT	CGAAAGAGT:CGAAAGAGT	AA:CG	AG:AG	GTTAC:GTTAC	ATTGA:ATGA	GGA:GGA	GATATATATC:GGTATATATC	AC:GT	NA	GAA:GAA	ATAAAATAG:ATAAAATAG	CA:CA	CG:CG	CAT:CAT	CCT:CCT	GGA:GGA	CAACT:CAACT	TTTTTAACC:TCTTCAAAG	GC:GCTTTGCC	TAAAAGAAGGT:TAAAAGAAGGT	ATCTTATAA:ATCTTATAA	AA	TCCCCTTCTCTCTCCG:TCCCCTTCTCTCTCCG	ATTAAA:ATTAAA	TAAGAAGT:TAAGAAGT	G:G	A:A	A:A	G:G	A:A	G:G	A:A	G:G
A-1229-19	TAA:TAC	ACCCCCCA:ACTCCCCCA	ACCCCCCCA:ACTCCCCCA	TGCTAAAT:TGCTAAAT	TGCTAAATTGAAAGGCTAATTACCATACGTGGTGGAAGATTGTAATCTCCAACAAA:TGCTAAATTGAAAGGCTAATTACCATACGTGGTGGAAGATTGTAATCTCCAACAAA	TTTTTAACCAAG:TCTTCAAAGAAG	CT:CT	CT:CT	TACT:TACT	ACCTCCG:ACCTCCG	ACCTCCT:ACCTCCT	CAAC:CAAC	CGAG:CGAG	CGAC:CGAC	CAAAAAGAGT:CAAAAAGAGT	CAAAAGAGT:CAAAAGAGT	CGAAAGAGT:CGAAAGAGT	AA:CG	AG:AG	GTTAC:GTTAC	ATTGA:ATGA	GGA:GGA	GATATATATC:GGTATATATC	AC:GT	GAA:GAA	GAA:GAA	ATAAAATAG:ATAAAATAG	CA:CA	CG:CG	CAT:CAT	CCT:CCT	GGA:GGA	CAACT:CAAACT	TTTTTAACC:TCTTCAAAG	NA	TAAAAGAAGGT:TAAAAGAAGGT	ATCTTATAA:ATCTTATAA	AA	TCCCCTTCTCTCTCCG:TCCCCTTCTCTCTCCG	ATTAAA:ATTAAA	TAAGAAGT:TAAGAAGT	G:G	A:A	A:A	A:G	A:A	G:G	A:A	G:G
A-1229-23	TAA:TAC	ACCCCCCA:ACTCCCCCA	ACCCCCCCA:ACTCCCCCA	TGCTAAAT:TGCTAAAT	TGCTAAATTGAAAGGCTAATTACCATACGTGGTGGAAGATTGTAATCTCCAACAAA:TGCTAAATTGAAAGGCTAATTACCATACGTGGTGGAAGATTGTAATCTCCAACAAA	TTTTTAACCAAG:TCTTCAAAGAAG	CT:CT	CT:CT	TACT:TACT	ACCTCCG:ACCTCCG	ACCTCCT:ACCTCCT	CAAC:CAAC	CGAG:CGAG	CGAC:CGAC	CAAAAAGAGT:CAAAAAGAGT	CAAAAGAGT:CAAAAGAGT	NA	AA:CG	AG:AG	GTTAC:GTTAC	ATTGA:ATGA	GGA:GGA	GATATATATC:GGTATATATC	AC:GT	GAA:GAA	GAA:GAA	ATAAAATAG:ATAAAATAG	CA:CA	CG:CG	CAT:CAT	CCT:CCT	GGA:GGA	CAACT:CAAACT	TTTTTAACC:TCTTCAAAG	GCTTTGCC:GCTTTGCC	TAAAAGAAGGT:TAAAAGAAGGT	ATCTTATAA:ATCTTATAA	AA	TCCCCTTCTCTCTCCG:TCCCCTTCTCTCTCCG	ATTAAA:ATTAAA	TAAGAAGT:TAAGAAGT	G:G	A:A	A:A	G:G	A:A	G:G	A:A	G:G
A-1236-14	TAC:TAC	ACCCCCCA:ACTCCCCCA	ACCCCCCCA:ACTCCCCCA	TT:TGCTAAAT	TGCTAAATTGAAAGGCTAATTACCATACGTGGTGGAAGATTGTAATCTCCAACAAA:TTTAG	TTTTTAACCAAG:TCTTCAAAGAAG	CT:CT	CT:CT	TACT:TACT	ACCTCCG:ACCTCCG	ACCTCCT:GCCTTCA	CAAC:CAAC	CGAG:CGAG	CGAC:CGAC	CAAAAAGAGT:CAAAAAGAGT	CAAAAGAGT:CAAAAGAGT	CGAAAGAGT:CGAAAGAGT	AA:CG	AG:AG	GTTAC:GTTAC	ATTGA:ATGA	GGA:GGA	GATATATATC:GATATATATC	AC:AC	GAA:GAA	GAA:GAA	ATAAAATAG:ATAAAATAG	CA:CA	CG:CG	CAT:CAT	CCT:CCT	GGA:GGA	CAACT:CAAACT	TTTTTAACC:TCTTCAAAG	NA	TAAAAGAAGGT:TAAAAGAAGGT	ATCTTATAA:ATCTTATAA	AA	TCCCCTTCTCTCTCCG:TCCCCTTCTCTCTCCG	ATTAAA:ATTAAA	TAAGAAGT:TAAGAAGT	G:G	A:A	A:A	A:G	T:A	G:G	A:A	G:G
A-1236-16	TAC:TAC	ACTCCCCCA:ACTCCCCCA	ACTCCCCCA:ACTCCCCCA	TT:TGCTAAAT	TGCTAAATTGAAAGGCTAATTACCATACGTGGTGGAAGATTGTAATCTCCAACAAA:TTTAG	TTTTTAACCAAG:TCTTCAAAGAAG	CT:CT	CT:CT	TACT:TACT	ACCTCCG:ACCTCCG	ACCTCCT:ACCTCCT	CAAC:CAAC	CGAG:CGAG	CGAC:CGAC	CAAAAAGAGT:CAAAAAGAGT	CAAAAGAGT:CAAAAGAGT	CGAAAGAGT:CGAAAGAGT	AA:AA	AG:AG	GTTAC:GTTAC	ATTGA:ATGA	GGA:GGA	GATATATATC:GATATATATC	AC:AC	GAA:GAA	GAA:GAA	ATAAAATAG:ATAAAATAG	CA:CA	CG:CG	CAT:CAT	CCT:CCT	GGA:GGA	CAACT:CAACT	TTTTTAACC:TCTTCAAAG	NA	TAAAAGAAGGT:TAAAAGAAGGT	ATCTTATAA:ATCTTATAA	AA	TCCCCTTCTCTCTCCG:TCCCCTTCTCTCTCCG	ATTAAA:ATTAAA	TAAGAAGT:TAAGAAGT	G:G	A:A	A:A	A:A	T:A	G:G	A:A	G:G
A-1236-18	TAC:TAC	ACCCCCCA:ACTCCCCCA	ACCCCCCCA:ACTCCCCCA	TT:TGCTAAAT	TGCTAAATTGAAAGGCTAATTACCATACGTGGTGGAAGATTGTAATCTCCAACAAA:TTTAG	TTTTTAACCAAG:TCTTCAAAGAAG	CT:CT	CT:CT	TACT:TACT	ACCTCCG:ACCTCCG	ACCTCCT:ACCTCCT	CAAC:CAAC	CGAG:CGAG	CGAC:CGAC	CAAAAAGAGT:CAAAAAGAGT	CAAAAGAGT:CAAAAGAGT	CGAAAGAGT:CGAAAGAGT	AA:AA	AG:AG	GTTAC:GTTAC	ATTGA:ATGA	GGA:GGA	GATATATATC:GATATATATC	AC:AC	GAA:GAA	GAA:GAA	ATAAAATAG:ATAAAATAG	CA:CA	CG:CG	CAT:CAT	CCT:CCT	GGA:GGA	CAACT:CAACT	TTTTTAACC:TCTTCAAAG	NA	TAAAAGAAGGT:TAAAAGAAGGT	ATCTTATAA:ATCTTATAA	AA	TCCCCTTCTCTCTCCG:TCCCCTTCTCTCTCCG	NA	TAAGAAGT:TAGAAGT	G:G	A:A	A:A	A:G	T:A	G:G	A:A	G:G
A-1236-20	TAC:TAC	ACCCCCCA:ACTCCCCCA	ACCCCCCCA:ACTCCCCCA	TGCTAAAT:TGCTAAAT	TGCTAAATTGAAAGGCTAATTACCATACGTGGTGGAAGATTGTAATCTCCAACAAA:TGCTAAATTGAAAGGCTAATTACCATACGTGGTGGAAGATTGTAATCTCCAACAAA	TTTTTAACCAAG:TCTTCAAAGAAG	CT:CT	CT:CT	TACT:TACT	ACCTCCG:ACCTCCG	NA	CAAC:CAAC	CGAG:CGAG	CGAC:CGAC	CAAAAAGAGT:CAAAAAGAGT	CAAAAGAGT:CAAAAGAGT	CGAAAGAGT:CGAAAGAGT	AA:AA	AG:AG	GTTAC:GTTAC	ATTGA:ATGA	GGA:GGA	GATATATATC:GATATATATC	AC:AC	GAA:GAA	GAA:GAA	ATAAAATAG:ATAAAATAG	CA:CA	CG:CG	CAT:CAT	CCT:CCT	GGA:GGA	CAACT:CAAACT	TTTTTAACC:TCTTCAAAG	NA	TAAAAGAAGGT:TAAAAGAAGGT	ATCTTATAA:ATCTTATAA	AA	TCCCCTTCTCTCTCCG:TCCCCTTCTCTCTCCG	ATTAAA:ATTAAA	TAAGAAGT:TAAGAAGT	G:G	A:A	A:A	A:A	A:A	G:G	A:A	G:G
A-1236-21	TAC:TAC	ACCCCCCA:ACTCCCCCA	ACCCCCCCA:ACTCCCCCA	NA	TGCTAAATTGAAAGGCTAATTACCATACGTGGTGGAAGATTGTAATCTCCAACAAA:TTTAG	TTTTTAACCAAG:TCTTCAAAGAAG	CT:CT	CT:CT	TACT:TACT	ACCTCCG:ACCTCCG	ACCTCCT:GCCTTCA	CAAC:CAAC	CGAG:CGAG	CGAC:CGAC	CAAAAAGAGT:CAAAAAGAGT	CAAAAGAGT:CAAAAGAGT	CGAAAGAGT:CGAAAGAGT	AA:CG	AG:AG	GTTAC:GTTAC	ATTGA:ATGA	GGA:GGA	GATATATATC:GATATATATC	AC:AC	GAA:GAA	GAA:GAA	ATAAAATAG:ATAAAATAG	CA:CA	CG:CG	CAT:CAT	CCT:CCT	GGA:GGA	CAACT:CAAACT	TTTTTAACC:TCTTCAAAG	NA	TAAAAGAAGGT:TAAAAGAAGGT	ATCTTATAA:ATCTTATAA	AA	TCCCCTTCTCTCTCCG:TCCCCTTCTCTCTCCG	ATTAAA:ATTAAA	TAAGAAGT:TAAGAAGT	G:G	A:A	A:A	A:G	T:A	G:G	A:A	G:G
A-1236-22	TAC:TAC	ACCCCCCA:ACTCCCCCA	ACCCCCCCA:ACTCCCCCA	TT:TGCTAAAT	TGCTAAATTGAAAGGCTAATTACCATACGTGGTGGAAGATTGTAATCTCCAACAAA:TTTAG	TTTTTAACCAAG:TCTTCAAAGAAG	CT:CT	CT:CT	TACT:TACT	ACCTCCG:ACCTCCG	ACCTCCT:ACCTCCT	CAAC:CAAC	CGAG:CGAG	CGAC:CGAC	CAAAAAGAGT:CAAAAAGAGT	CAAAAGAGT:CAAAAGAGT	CGAAAGAGT:CGAAAGAGT	AA:CG	AG:AG	GTTAC:GTTAC	ATTGA:ATGA	GGA:GGA	GATATATATC:GATATATATC	AC:AC	GAA:GAA	GAA:GAA	ATAAAATAG:ATAAAATAG	CA:CA	CG:CG	CAT:CAT	CCT:CCT	GGA:GGA	CAACT:CAACT	TTTTTAACC:TCTTCAAAG	NA	TAAAAGAAGGT:TAAAAGAAGGT	ATCTTATAA:ATCTTATAA	AA	TCCCCTTCTCTCTCCG:TCCCCTTCTCTCTCCG	ATTAAA:ATTAAA	TAAGAAGT:TAGAAGT	G:G	A:A	A:A	G:G	T:A	G:G	A:A	G:G
A-1236-24	TAC:TAC	ACCCCCCA:ACTCCCCCA	ACCCCCCCA:ACTCCCCCA	TT:TGCTAAAT	TGCTAAATTGAAAGGCTAATTACCATACGTGGTGGAAGATTGTAATCTCCAACAAA:TTTAG	TTTTTAACCAAG:TCTTCAAAGAAG	CT:CT	CT:CT	TACT:TACT	ACCTCCG:ACCTCCG	ACCTCCT:GCCTTCA	CAAC:CAAC	CGAG:CGAG	CGAC:CGAC	CAAAAAGAGT:CAAAAAGAGT	CAAAAGAGT:CAAAAGAGT	NA	AA:CG	AG:AG	GTTAC:GTTAC	ATTGA:ATGA	GGA:GGA	GATATATATC:GATATATATC	AC:AC	GAA:GAA	GAA:GAA	ATAAAATAG:ATAAAATAG	CA:CA	CG:CG	CAT:CAT	CCT:CCT	GGA:GGA	CAACT:CAACT	TTTTTAACC:TCTTCAAAG	NA	TAAAAGAAGGT:TAAAAGAAGGT	ATCTTATAA:ATCTTATAA	AA	TCCCCTTCTCTCTCCG:TCCCCTTCTCTCTCCG	ATTAAA:ATTAAA	TAAGAAGT:TAGAAGT	G:G	A:A	A:A	A:G	T:A	G:G	A:A	G:G
A-1236-29	TAC:TAC	ACCCCCCA:ACTCCCCCA	ACCCCCCCA:ACTCCCCCA	TT:TGCTAAAT	TGCTAAATTGAAAGGCTAATTACCATACGTGGTGGAAGATTGTAATCTCCAACAAA:TTTAG	TTTTTAACCAAG:TCTTCAAAGAAG	CT:CT	CT:CT	TACT:TACT	ACCTCCG:ACCTCCG	ACCTCCT:ACCTCCT	CAAC:CAAC	CGAG:CGAG	CGAC:CGAC	CAAAAAGAGT:CAAAAAGAGT	CAAAAGAGT:CAAAAGAGT	CGAAAGAGT:CGAAAGAGT	AA:CG	AG:AG	GTTAC:GTTAC	ATTGA:ATGA	GGA:GGA	GATATATATC:GATATATATC	AC:AC	GAA:GAA	GAA:GAA	ATAAAATAG:ATAAAATAG	CA:CA	CG:CG	CAT:CAT	CCT:CCT	GGA:GGA	CAACT:CAAACT	TTTTTAACC:TCTTCAAAG	NA	TAAAAGAAGGT:TAAAAGAAGGT	ATCTTATAA:ATCTTATAA	AA	TCCCCTTCTCTCTCCG:TCCCCTTCTCTCTCCG	ATTAAA:ATTAAA	TAAGAAGT:TAGAAGT	G:G	A:A	A:A	A:G	T:A	G:G	A:A	G:G
A-1236-33	NA	NA	NA	NA	NA	NA	NA	NA	NA	NA	NA	NA	NA	NA	NA	NA	NA	NA	NA	NA	NA	NA	NA	NA	NA	NA	NA	NA	NA	NA	NA	NA	NA	NA	NA	NA	NA	NA	NA	NA	NA	NA	NA	NA	NA	NA	NA	NA	NA
A-1236-34	TAC:TAC	ACCCCCCA:ACTCCCCCA	ACCCCCCCA:ACTCCCCCA	TT:TGCTAAAT	TGCTAAATTGAAAGGCTAATTACCATACGTGGTGGAAGATTGTAATCTCCAACAAA:TTTAG	TTTTTAACCAAG:TCTTCAAAGAAG	CT:CT	CT:CT	TACT:TACT	ACCTCCG:ACCTCCG	ACCTCCT:ACCTCCT	CAAC:CAAC	CGAG:CGAG	CGAC:CGAC	CAAAAAGAGT:CAAAAAGAGT	CAAAAGAGT:CAAAAGAGT	CGAAAGAGT:CGAAAGAGT	AA:CG	AG:AG	GTTAC:GTTAC	ATTGA:ATGA	GGA:GGA	GATATATATC:GATATATATC	AC:AC	GAA:GAA	GAA:GAA	ATAAAATAG:ATAAAATAG	CA:CA	NA	CAT:CAT	CCT:CCT	GGA:GGA	CAACT:CAAACT	TTTTTAACC:TCTTCAAAG	NA	TAAAAGAAGGT:TAAAAGAAGGT	ATCTTATAA:ATCTTATAA	AA	TCCCCTTCTCTCTCCG:TCCCCTTCTCTCTCCG	ATTAAA:ATTAAA	TAAGAAGT:TAAGAAGT	G:G	A:A	NA	A:G	T:A	G:G	A:A	G:G
A-1236-35	TAC:TAC	ACCCCCCA:ACTCCCCCA	ACCCCCCCA:ACTCCCCCA	TT:TGCTAAAT	TGCTAAATTGAAAGGCTAATTACCATACGTGGTGGAAGATTGTAATCTCCAACAAA:TTTAG	TTTTTAACCAAG:TCTTCAAAGAAG	CT:CT	CT:CT	TACT:TACT	ACCTCCG:ACCTCCG	ACCTCCT:ACCTCCT	CAAC:CAAC	CGAG:CGAG	CGAC:CGAC	CAAAAAGAGT:CAAAAAGAGT	CAAAAGAGT:CAAAAGAGT	CGAAAGAGT:CGAAAGAGT	AA:CG	AG:AG	GTTAC:GTTAC	ATTGA:ATGA	GGA:GGA	GATATATATC:GATATATATC	AC:AC	GAA:GAA	GAA:GAA	ATAAAATAG:ATAAAATAG	CA:CA	CG:CG	CAT:CAT	CCT:CCT	GGA:GGA	CAACT:CAACT	TTTTTAACC:TCTTCAAAG	NA	TAAAAGAAGGT:TAAAAGAAGGT	ATCTTATAA:ATCTTATAA	AA	TCCCCTTCTCTCTCCG:TCCCCTTCTCTCTCCG	ATTAAA:ATTAAA	TAAGAAGT:TAAGAAGT	G:G	A:A	A:A	A:G	T:A	G:G	A:A	G:G
A-1236-37	TAC:TAC	ACCCCCCA:ACTCCCCCA	ACCCCCCCA:ACTCCCCCA	NA	TGCTAAATTGAAAGGCTAATTACCATACGTGGTGGAAGATTGTAATCTCCAACAAA:TTTAG	TTTTTAACCAAG:TCTTCAAAGAAG	CT:CT	CT:CT	TACT:TACT	ACCTCCG:ACCTCCG	ACCTCCT:ACCTCCT	CAAC:CAAC	CGAG:CGAG	CGAC:CGAC	CAAAAAGAGT:CAAAAAGAGT	CAAAAGAGT:CAAAAGAGT	CGAAAGAGT:CGAAAGAGT	AA:CG	AG:AG	GTTAC:GTTAC	ATTGA:ATGA	GGA:GGA	GATATATATC:GATATATATC	AC:AC	GAA:GAA	GAA:GAA	ATAAAATAG:ATAAAATAG	CA:CA	CG:CG	CAT:CAT	CCT:CCT	GGA:GGA	CAACT:CAAACT	TTTTTAACC:TCTTCAAAG	NA	TAAAAGAAGGT:TAAAAGAAGGT	ATCTTATAA:ATCTTATAA	AA	TCCCCTTCTCTCTCCG:TCCCCTTCTCTCTCCG	ATTAAA:ATTAAA	TAAGAAGT:TAAGAAGT	G:G	A:A	A:A	A:G	T:A	G:G	A:A	G:G
A-1236-38	TAC:TAC	ACCCCCCA:ACTCCCCCA	ACCCCCCCA:ACTCCCCCA	NA	TGCTAAATTGAAAGGCTAATTACCATACGTGGTGGAAGATTGTAATCTCCAACAAA:TTTAG	TTTTTAACCAAG:TCTTCAAAGAAG	CT:CT	CT:CT	TACT:TACT	ACCTCCG:ACCTCCG	NA	CAAC:CAAC	CGAG:CGAG	CGAC:CGAC	CAAAAAGAGT:CAAAAAGAGT	CAAAAGAGT:CAAAAGAGT	CGAAAGAGT:CGAAAGAGT	AA:AA	AG:AG	GTTAC:GTTAC	ATTGA:ATGA	GGA:GGA	GATATATATC:GATATATATC	AC:AC	GAA:GAA	GAA:GAA	ATAAAATAG:ATAAAATAG	CA:CA	CG:CG	CAT:CAT	CCT:CCT	GGA:GGA	CAACT:CAAACT	TTTTTAACC:TCTTCAAAG	NA	TAAAAGAAGGT:TAAAAGAAGGT	ATCTTATAA:ATCTTATAA	AA	TCCCCTTCTCTCTCCG:TCCCCTTCTCTCTCCG	ATTAAA:ATTAAA	TAAGAAGT:TAAGAAGT	G:G	A:A	A:A	G:G	T:A	G:G	A:A	G:G
A-1236-39	TAC:TAC	ACCCCCCA:ACTCCCCCA	ACCCCCCCA:ACTCCCCCA	TT:TGCTAAAT	TGCTAAATTGAAAGGCTAATTACCATACGTGGTGGAAGATTGTAATCTCCAACAAA:TTTAG	TTTTTAACCAAG:TCTTCAAAGAAG	CT:CT	CT:CT	TACT:TACT	ACCTCCG:ACCTCCG	ACCTCCT:ACCTCCT	CAAC:CAAC	CGAG:CGAG	CGAC:CGAC	CAAAAAGAGT:CAAAAAGAGT	CAAAAGAGT:CAAAAGAGT	CGAAAGAGT:CGAAAGAGT	AA:CG	AG:AG	GTTAC:GTTAC	ATTGA:ATGA	GGA:GGA	GATATATATC:GATATATATC	AC:AC	GAA:GAA	GAA:GAA	ATAAAATAG:ATAAAATAG	CA:CA	CG:CG	CAT:CAT	CCT:CCT	GGA:GGA	CAACT:CAACT	TTTTTAACC:TCTTCAAAG	NA	TAAAAGAAGGT:TAAAAGAAGGT	ATCTTATAA:ATCTTATAA	AA	TCCCCTTCTCTCTCCG:TCCCCTTCTCTCTCCG	ATTAAA:ATTAAA	TAAGAAGT:TAAGAAGT	G:G	A:A	A:A	A:G	T:A	G:G	A:A	G:G
A-1236-42	TAC:TAC	ACCCCCCA:ACTCCCCCA	ACCCCCCCA:ACTCCCCCA	TT:TGCTAAAT	TGCTAAATTGAAAGGCTAATTACCATACGTGGTGGAAGATTGTAATCTCCAACAAA:TTTAG	TTTTTAACCAAG:TCTTCAAAGAAG	CT:CT	CT:CT	TACT:TACT	ACCTCCG:ACCTCCG	ACCTCCT:ACCTCCT	CAAC:CAAC	CGAG:CGAG	CGAC:CGAC	CAAAAAGAGT:CAAAAAGAGT	CAAAAGAGT:CAAAAGAGT	CGAAAGAGT:CGAAAGAGT	AA:CG	AG:AG	GTTAC:GTTAC	ATTGA:ATGA	GGA:GGA	GATATATATC:GATATATATC	AC:AC	GAA:GAA	GAA:GAA	ATAAAATAG:ATAAAATAG	CA:CA	CG:CG	CAT:CAT	CCT:CCT	GGA:GGA	CAACT:CAACT	TTTTTAACC:TCTTCAAAG	NA	TAAAAGAAGGT:TAAAAGAAGGT	ATCTTATAA:ATCTTATAA	AA	TCCCCTTCTCTCTCCG:TCCCCTTCTCTCTCCG	ATTAAA:ATTAAA	TAAGAAGT:TAAGAAGT	G:G	A:A	A:A	A:G	T:A	G:G	A:A	G:G
A-1236-44	TAC:TAC	ACCCCCCA:ACTCCCCCA	ACCCCCCCA:ACTCCCCCA	TGCTAAAT:TGCTAAAT	TGCTAAATTGAAAGGCTAATTACCATACGTGGTGGAAGATTGTAATCTCCAACAAA:TGCTAAATTGAAAGGCTAATTACCATACGTGGTGGAAGATTGTAATCTCCAACAAA	TTTTTAACCAAG:TCTTCAAAGAAG	CT:CT	CT:CT	TACT:TACT	ACCTCCG:ACCTCCG	ACCTCCT:ACCTCCT	CAAC:CAAC	CGAG:CGAG	CGAC:CGAC	CAAAAAGAGT:CAAAAAGAGT	CAAAAGAGT:CAAAAGAGT	CGAAAGAGT:CGAAAGAGT	AA:CG	AG:AG	GTTAC:GTTAC	ATTGA:ATGA	GGA:GGA	GATATATATC:GATATATATC	AC:AC	GAA:GAA	GAA:GAA	ATAAAATAG:ATAAAATAG	CA:CA	CG:CG	CAT:CAT	CCT:CCT	GGA:GGA	CAACT:CAAACT	TTTTTAACC:TCTTCAAAG	NA	TAAAAGAAGGT:TAAAAGAAGGT	ATCTTATAA:ATCTTATAA	AA	TCCCCTTCTCTCTCCG:TCCCCTTCTCTCTCCG	ATTAAA:ATTAAA	TAAGAAGT:TAGAAGT	G:G	A:A	A:A	A:G	A:A	G:G	A:A	G:G
A-1250-2	TAC:TAC	ACCCCCCA:ACTCCCCCA	ACCCCCCCA:ACTCCCCCA	NA	TGCTAAATTGAAAGGCTAATTACCATACGTGGTGGAAGATTGTAATCTCCAACAAA:TGCTAAATTGAAAGGCTAATTACCATACGTGGTGGAAGATTGTAATCTCCAACAAA	TTTTTAACCAAG:TCTTCAAAGAAG	CT:CT	CT:CT	TACT:TACT	ACCTCCG:ACCTCCG	ACCTCCT:ACCTCCT	CAAC:CAAC	CGAG:CGAG	CGAC:CGAC	CAAAAAGAGT:CAAAAAGAGT	CAAAAGAGT:CAAAAGAGT	NA	AA:CG	AG:AG	GTTAC:GTTAC	ATTGA:ATGA	GGA:GGA	GATATATATC:GGTATATATC	NA	GAA:GAA	GAA:GAA	ATAAAATAG:ATAAAATAG	CA:CA	CG:CG	CAT:CAT	CCT:CCT	GGA:GGA	CAACT:CAAACT	TTTTTAACC:TCTTCAAAG	NA	TAAAAGAAGGT:TAAAAGAAGGT	ATCTTATAA:ATCTTATAA	AA	TCCCCTTCTCTCTCCG:TCCCCTTCTCTCTCCG	ATTAAA:ATTAAA	TAAGAAGT:TAAGAAGT	G:G	A:A	A:A	A:G	T:A	G:G	A:A	G:G
A-1250-3	TAC:TAC	ACCCCCCA:ACTCCCCCA	ACCCCCCCA:ACTCCCCCA	TGCTAAAT:TGCTAAAT	TGCTAAATTGAAAGGCTAATTACCATACGTGGTGGAAGATTGTAATCTCCAACAAA:TGCTAAATTGAAAGGCTAATTACCATACGTGGTGGAAGATTGTAATCTCCAACAAA	TTTTTAACCAAG:TCTTCAAAGAAG	CT:CT	CT:CT	TACT:TACT	ACCTCCG:ACCTCCG	ACCTCCT:ACCTCCT	CAAC:CAAC	CGAG:CGAG	CGAC:CGAC	CAAAAAGAGT:CAAAAAGAGT	CAAAAGAGT:CAAAAGAGT	CGAAAGAGT:CGAAAGAGT	AA:AA	AG:AG	GTTAC:GTTAC	ATTGA:ATGA	GGA:GGA	GATATATATC:GGTATATATC	AC:GT	GAA:GAA	GAA:GAA	ATAAAATAG:ATAAAATAG	CA:CA	CG:CG	CAT:CAT	CCT:CCT	GGA:GGA	CAACT:CAAACT	TTTTTAACC:TCTTCAAAG	NA	TAAAAGAAGGT:TAAAAGAAGGT	ATCTTATAA:ATCTTATAA	AAACATACACAGCATGCGA:AAACATACACAGCATGCGA	TCCCCTTCTCTCTCCG:TCCCCTTCTCTCTCCG	ATTAAA:ATTAAA	TAAGAAGT:TAAGAAGT	G:G	A:A	A:A	G:G	T:A	G:G	A:A	G:G
A-1250-5	TAC:TAC	ACCCCCCA:ACTCCCCCA	ACCCCCCCA:ACTCCCCCA	TGCTAAAT:TGCTAAAT	TGCTAAATTGAAAGGCTAATTACCATACGTGGTGGAAGATTGTAATCTCCAACAAA:TGCTAAATTGAAAGGCTAATTACCATACGTGGTGGAAGATTGTAATCTCCAACAAA	TTTTTAACCAAG:TCTTCAAAGAAG	CT:CT	CT:CT	TACT:TACT	ACCTCCG:ACCTCCG	ACCTCCT:ACCTCCT	CAAC:CAAC	CGAG:CGAG	CGAC:CGAC	CAAAAAGAGT:CAAAAAGAGT	CAAAAGAGT:CAAAAGAGT	NA	AA:CG	AG:AG	GTTAC:GTTAC	ATTGA:ATGA	GGA:GGA	GATATATATC:GGTATATATC	AC:GT	GAA:GAA	GAA:GAA	ATAAAATAG:ATAAAATAG	CA:CA	CG:CG	CAT:CAT	CCT:CCT	GGA:GGA	CAACT:CAAACT	TTTTTAACC:TCTTCAAAG	NA	TAAAAGAAGGT:TAAAAGAAGGT	ATCTTATAA:ATCTTATAA	AA	TCCCCTTCTCTCTCCG:TCCCCTTCTCTCTCCG	ATTAAA:ATTAAA	TAAGAAGT:TAAGAAGT	G:G	A:A	A:A	A:G	A:A	G:G	A:A	G:G
A-1250-7	TAC:TAC	ACCCCCCA:ACTCCCCCA	ACCCCCCCA:ACTCCCCCA	TGCTAAAT:TGCTAAAT	TGCTAAATTGAAAGGCTAATTACCATACGTGGTGGAAGATTGTAATCTCCAACAAA:TGCTAAATTGAAAGGCTAATTACCATACGTGGTGGAAGATTGTAATCTCCAACAAA	TTTTTAACCAAG:TCTTCAAAGAAG	CT:CT	CT:CT	TACT:TACT	ACCTCCG:ACCTCCG	NA	CAAC:CAAC	CGAG:CGAG	CGAC:CGAC	CAAAAAGAGT:CAAAAAGAGT	CAAAAGAGT:CAAAAGAGT	CGAAAGAGT:CGAAAGAGT	AA:AA	AG:AG	GTTAC:GTTAC	ATTGA:ATGA	GGA:GGA	GATATATATC:GGTATATATC	GT:GT	GAA:GAA	GAA:GAA	ATAAAATAG:ATAAAATAG	CA:CA	CG:CG	CAT:CAT	CCT:CCT	GGA:GGA	CAACT:CAAACT	TTTTTAACC:TCTTCAAAG	NA	TAAAAGAAGGT:TAAAAGAAGGT	ATCTTATAA:ATCTTATAA	AA	TCCCCTTCTCTCTCCG:TCCCCTTCTCTCTCCG	ATTAAA:ATTAAA	TAAGAAGT:TAAGAAGT	G:G	A:A	A:A	A:G	T:A	G:G	A:A	G:G
A-1250-9	TAC:TAC	ACCCCCCA:ACTCCCCCA	ACCCCCCCA:ACTCCCCCA	TGCTAAAT:TGCTAAAT	TGCTAAATTGAAAGGCTAATTACCATACGTGGTGGAAGATTGTAATCTCCAACAAA:TGCTAAATTGAAAGGCTAATTACCATACGTGGTGGAAGATTGTAATCTCCAACAAA	TTTTTAACCAAG:TCTTCAAAGAAG	CT:CT	CT:CT	TACT:TACT	ACCTCCG:ACCTCCG	NA	CAAC:CAAC	CGAG:CGAG	CGAC:CGAC	CAAAAAGAGT:CAAAAAGAGT	CAAAAGAGT:CAAAAGAGT	CGAAAGAGT:CGAAAGAGT	AA:AA	AG:AG	GTTAC:GTTAC	ATTGA:ATGA	GGA:GGA	GATATATATC:GGTATATATC	GT:GT	GAA:GAA	GAA:GAA	ATAAAATAG:ATAAAATAG	CA:CA	CG:CG	CAT:CAT	CCT:CCT	GGA:GGA	CAACT:CAAACT	TTTTTAACC:TCTTCAAAG	NA	TAAAAGAAGGT:TAAAAGAAGGT	ATCTTATAA:ATCTTATAA	AAACATACACAGCATGCGA:AAACATACACAGCATGCGA	TCCCCTTCTCTCTCCG:TCCCCTTCTCTCTCCG	ATTAAA:ATTAAA	TAAGAAGT:TAAGAAGT	G:G	A:A	A:A	A:G	A:A	G:G	A:A	G:G
A-1250-10	TAC:TAC	ACCCCCCA:ACTCCCCCA	ACCCCCCCA:ACTCCCCCA	TGCTAAAT:TGCTAAAT	TGCTAAATTGAAAGGCTAATTACCATACGTGGTGGAAGATTGTAATCTCCAACAAA:TGCTAAATTGAAAGGCTAATTACCATACGTGGTGGAAGATTGTAATCTCCAACAAA	TTTTTAACCAAG:TCTTCAAAGAAG	CT:CT	CT:CT	TACT:TACT	ACCTCCG:ACCTCCG	ACCTCCT:ACCTCCT	CAAC:CAAC	CGAG:CGAG	CGAC:CGAC	CAAAAAGAGT:CAAAAAGAGT	CAAAAGAGT:CAAAAGAGT	CGAAAGAGT:CGAAAGAGT	AA:CG	AG:AG	GTTAC:GTTAC	ATTGA:ATGA	GGA:GGA	GATATATATC:GGTATATATC	AC:GT	GAA:GAA	GAA:GAA	ATAAAATAG:ATAAAATAG	CA:CA	CG:CG	CAT:CAT	CCT:CCT	GGA:GGA	CAACT:CAAACT	TTTTTAACC:TCTTCAAAG	NA	TAAAAGAAGGT:TAAAAGAAGGT	ATCTTATAA:ATCTTATAA	AA	TCCCCTTCTCTCTCCG:TCCCCTTCTCTCTCCG	ATTAAA:ATTAAA	TAAGAAGT:TAAGAAGT	G:G	A:A	A:A	A:G	T:A	G:G	A:A	G:G
A-1250-11	TAC:TAC	ACCCCCCA:ACTCCCCCA	ACCCCCCCA:ACTCCCCCA	TGCTAAAT:TGCTAAAT	TGCTAAATTGAAAGGCTAATTACCATACGTGGTGGAAGATTGTAATCTCCAACAAA:TGCTAAATTGAAAGGCTAATTACCATACGTGGTGGAAGATTGTAATCTCCAACAAA	TTTTTAACCAAG:TCTTCAAAGAAG	CT:CT	CT:CT	TACT:TACT	ACCTCCG:ACCTCCG	ACCTCCT:ACCTCCT	CAAC:CAAC	CGAG:CGAG	CGAC:CGAC	CAAAAAGAGT:CAAAAAGAGT	CAAAAGAGT:CAAAAGAGT	NA	AA:CG	AG:AG	GTTAC:GTTAC	ATTGA:ATGA	GGA:GGA	GATATATATC:GATATATATC	AC:AC	GAA:GAA	GAA:GAA	ATAAAATAG:ATAAAATAG	CA:CA	CG:CG	CAT:CAT	CCT:CCT	GGA:GGA	CAACT:CAACT	TTTTTAACC:TCTTCAAAG	NA	TAAAAGAAGGT:TAAAAGAAGGT	ATCTTATAA:ATCTTATAA	AAACATACACAGCATGCGA:AAACATACACAGCATGCGA	TCCCCTTCTCTCTCCG:TCCCCTTCTCTCTCCG	ATTAAA:ATTAAA	TAAGAAGT:TAAGAAGT	G:G	A:A	A:A	A:G	T:A	G:G	A:A	G:G
A-1250-13	TAC:TAC	ACCCCCCA:ACTCCCCCA	ACCCCCCCA:ACTCCCCCA	TGCTAAAT:TGCTAAAT	TGCTAAATTGAAAGGCTAATTACCATACGTGGTGGAAGATTGTAATCTCCAACAAA:TGCTAAATTGAAAGGCTAATTACCATACGTGGTGGAAGATTGTAATCTCCAACAAA	TTTTTAACCAAG:TCTTCAAAGAAG	CT:CT	CT:CT	TACT:TACT	ACCTCCG:ACCTCCG	NA	CAAC:CAAC	CGAG:CGAG	CGAC:CGAC	CAAAAAGAGT:CAAAAAGAGT	CAAAAGAGT:CAAAAGAGT	CGAAAGAGT:CGAAAGAGT	AA:CG	AG:AG	GTTAC:GTTAC	ATTGA:ATGA	GGA:GGA	GATATATATC:GGTATATATC	GT:GT	GAA:GAA	GAA:GAA	ATAAAATAG:ATAAAATAG	CA:CA	CG:CG	CAT:CAT	CCT:CCT	GGA:GGA	CAACT:CAAACT	TTTTTAACC:TCTTCAAAG	NA	TAAAAGAAGGT:TAAAAGAAGGT	ATCTTATAA:ATCTTATAA	AAACATACACAGCATGCGA:AAACATACACAGCATGCGA	TCCCCTTCTCTCTCCG:TCCCCTTCTCTCTCCG	ATTAAA:ATTAAA	TAAGAAGT:TAAGAAGT	G:G	A:A	A:A	A:G	T:A	G:G	A:A	G:G
A-1250-26	TAC:TAC	ACCCCCCA:ACTCCCCCA	ACCCCCCCA:ACTCCCCCA	TGCTAAAT:TGCTAAAT	TGCTAAATTGAAAGGCTAATTACCATACGTGGTGGAAGATTGTAATCTCCAACAAA:TGCTAAATTGAAAGGCTAATTACCATACGTGGTGGAAGATTGTAATCTCCAACAAA	TTTTTAACCAAG:TCTTCAAAGAAG	CT:CT	CT:CT	TACT:TACT	ACCTCCG:ACCTCCG	NA	CAAC:CAAC	CGAG:CGAG	CGAC:CGAC	CAAAAAGAGT:CAAAAAGAGT	CAAAAGAGT:CAAAAGAGT	CGAAAGAGT:CGAAAGAGT	AA:AA	AG:AG	GTTAC:GTTAC	ATTGA:ATGA	GGA:GGA	GATATATATC:GATATATATC	AC:AC	GAA:GAA	GAA:GAA	ATAAAATAG:ATAAAATAG	CA:CA	CG:CG	CAT:CAT	CCT:CCT	GGA:GGA	CAACT:CAAACT	TTTTTAACC:TCTTCAAAG	NA	TAAAAGAAGGT:TAAAAGAAGGT	ATCTTATAA:ATCTTATAA	AAACATACACAGCATGCGA:AAACATACACAGCATGCGA	TCCCCTTCTCTCTCCG:TCCCCTTCTCTCTCCG	ATTAAA:ATTAAA	TAAGAAGT:TAAGAAGT	G:G	A:A	A:A	A:A	A:A	G:G	A:A	G:G
A-1250-27	TAC:TAC	ACCCCCCA:ACTCCCCCA	ACCCCCCCA:ACTCCCCCA	TGCTAAAT:TGCTAAAT	TGCTAAATTGAAAGGCTAATTACCATACGTGGTGGAAGATTGTAATCTCCAACAAA:TGCTAAATTGAAAGGCTAATTACCATACGTGGTGGAAGATTGTAATCTCCAACAAA	TTTTTAACCAAG:TCTTCAAAGAAG	CT:CT	CT:CT	TACT:TACT	ACCTCCG:ACCTCCG	ACCTCCT:ACCTCCT	CAAC:CAAC	CGAG:CGAG	CGAC:CGAC	CAAAAAGAGT:CAAAAAGAGT	CAAAAGAGT:CAAAAGAGT	CGAAAGAGT:CGAAAGAGT	AA:AA	AG:AG	GTTAC:GTTAC	ATTGA:ATGA	GGA:GGA	GATATATATC:GATATATATC	AC:AC	GAA:GAA	GAA:GAA	ATAAAATAG:ATAAAATAG	CA:CA	CG:CG	CAT:CAT	CCT:CCT	GGA:GGA	CAACT:CAAACT	TTTTTAACC:TCTTCAAAG	NA	TAAAAGAAGGT:TAAAAGAAGGT	ATCTTATAA:ATCTTATAA	NA	TCCCCTTCTCTCTCCG:TCCCCTTCTCTCTCCG	ATTAAA:ATTAAA	TAAGAAGT:TAAGAAGT	G:G	A:A	A:A	A:G	T:A	G:G	A:A	G:G
A-1250-29	TAC:TAC	ACCCCCCA:ACTCCCCCA	ACCCCCCCA:ACTCCCCCA	TGCTAAAT:TGCTAAAT	TGCTAAATTGAAAGGCTAATTACCATACGTGGTGGAAGATTGTAATCTCCAACAAA:TGCTAAATTGAAAGGCTAATTACCATACGTGGTGGAAGATTGTAATCTCCAACAAA	TTTTTAACCAAG:TCTTCAAAGAAG	CT:CT	CT:CT	TACT:TACT	ACCTCCG:ACCTCCG	NA	CAAC:CAAC	CGAG:CGAG	CGAC:CGAC	CAAAAAGAGT:CAAAAAGAGT	CAAAAGAGT:CAAAAGAGT	CGAAAGAGT:CGAAAGAGT	AA:AA	AG:AG	GTTAC:GTTAC	ATTGA:ATGA	GGA:GGA	GATATATATC:GGTATATATC	AC:GT	GAA:GAA	GAA:GAA	ATAAAATAG:ATAAAATAG	CA:CA	CG:CG	CAT:CAT	CCT:CCT	GGA:GGA	CAACT:CAACT	TTTTTAACC:TCTTCAAAG	NA	TAAAAGAAGGT:TAAAAGAAGGT	ATCTTATAA:ATCTTATAA	AA	TCCCCTTCTCTCTCCG:TCCCCTTCTCTCTCCG	ATTAAA:ATTAAA	TAAGAAGT:TAAGAAGT	G:G	A:A	A:A	G:G	T:A	G:G	A:A	G:G
A-1250-30	TAC:TAC	ACCCCCCA:ACTCCCCCA	ACCCCCCCA:ACTCCCCCA	TGCTAAAT:TGCTAAAT	TGCTAAATTGAAAGGCTAATTACCATACGTGGTGGAAGATTGTAATCTCCAACAAA:TGCTAAATTGAAAGGCTAATTACCATACGTGGTGGAAGATTGTAATCTCCAACAAA	TCTTCAAAGAAG:TCTTCAAAGAAG	CT:CT	CT:CT	TACT:TACT	ACCTCCG:ACCTCCG	ACCTCCT:ACCTCCT	CAAC:CAAC	CGAG:CGAG	CGAC:CGAC	CAAAAAGAGT:CAAAAAGAGT	CAAAAGAGT:CAAAAGAGT	CGAAAGAGT:CGAAAGAGT	AA:AA	AG:AG	GTTAC:GTTAC	ATTGA:ATGA	GGA:GGA	GATATATATC:GGTATATATC	GT:GT	GAA:GAA	GAA:GAA	ATAAAATAG:ATAAAATAG	CA:CA	CG:CG	CAT:CAT	CCT:CCT	GGA:GGA	CAACT:CAACT	TCTTCAAAG:TCTTCAAAG	NA	TAAAAGAAGGT:TAAAAGAAGGT	ATCTTATAA:ATCTTATAA	AAACATACACAGCATGCGA:AAACATACACAGCATGCGA	TCCCCTTCTCTCTCCG:TCCCCTTCTCTCTCCG	ATTAAA:ATTAAA	TAAGAAGT:TAAGAAGT	G:G	A:A	A:A	A:G	T:A	G:G	A:A	NA
A-1250-31	TAC:TAC	ACCCCCCA:ACTCCCCCA	ACCCCCCCA:ACTCCCCCA	TGCTAAAT:TGCTAAAT	TGCTAAATTGAAAGGCTAATTACCATACGTGGTGGAAGATTGTAATCTCCAACAAA:TGCTAAATTGAAAGGCTAATTACCATACGTGGTGGAAGATTGTAATCTCCAACAAA	TTTTTAACCAAG:TCTTCAAAGAAG	CT:CT	CT:CT	TACT:TACT	ACCTCCG:ACCTCCG	NA	CAAC:CAAC	CGAG:CGAG	CGAC:CGAC	CAAAAAGAGT:CAAAAAGAGT	CAAAAGAGT:CAAAAGAGT	CGAAAGAGT:CGAAAGAGT	AA:CG	AG:AG	GTTAC:GTTAC	ATTGA:ATGA	GGA:GGA	GATATATATC:GGTATATATC	GT:GT	GAA:GAA	GAA:GAA	ATAAAATAG:ATAAAATAG	CA:CA	CG:CG	CAT:CAT	CCT:CCT	GGA:GGA	CAACT:CAAACT	TTTTTAACC:TCTTCAAAG	NA	TAAAAGAAGGT:TAAAAGAAGGT	ATCTTATAA:ATCTTATAA	AAACATACACAGCATGCGA:AAACATACACAGCATGCGA	TCCCCTTCTCTCTCCG:TCCCCTTCTCTCTCCG	ATTAAA:ATTAAA	TAAGAAGT:TAAGAAGT	G:G	A:A	A:A	A:G	T:A	G:G	A:A	G:G
A-1250-32	TAC:TAC	ACTCCCCCA:ACTCCCCCA	ACTCCCCCA:ACTCCCCCA	TGCTAAAT:TGCTAAAT	TGCTAAATTGAAAGGCTAATTACCATACGTGGTGGAAGATTGTAATCTCCAACAAA:TGCTAAATTGAAAGGCTAATTACCATACGTGGTGGAAGATTGTAATCTCCAACAAA	TTTTTAACCAAG:TCTTCAAAGAAG	CT:CT	CT:CT	TACT:TACT	ACCTCCG:ACCTCCG	ACCTCCT:ACCTCCT	CAAC:CAAC	CGAG:CGAG	CGAC:CGAC	CAAAAAGAGT:CAAAAAGAGT	CAAAAGAGT:CAAAAGAGT	CGAAAGAGT:CGAAAGAGT	AA:AA	AG:AG	GTTAC:GTTAC	ATTGA:ATGA	GGA:GGA	GATATATATC:GATATATATC	AC:AC	GAA:GAA	GAA:GAA	ATAAAATAG:ATAAAATAG	CA:CA	CG:CG	CAT:CAT	CCT:CCT	GGA:GGA	CAACT:CAAACT	TTTTTAACC:TCTTCAAAG	NA	TAAAAGAAGGT:TAAAAGAAGGT	ATCTTATAA:ATCTTATAA	AA	TCCCCTTCTCTCTCCG:TCCCCTTCTCTCTCCG	ATTAAA:ATTAAA	TAAGAAGT:TAAGAAGT	G:G	A:A	A:A	A:G	T:A	G:G	A:A	G:G
A-1250-33	TAC:TAC	ACCCCCCA:ACTCCCCCA	ACCCCCCCA:ACTCCCCCA	TGCTAAAT:TGCTAAAT	TGCTAAATTGAAAGGCTAATTACCATACGTGGTGGAAGATTGTAATCTCCAACAAA:TGCTAAATTGAAAGGCTAATTACCATACGTGGTGGAAGATTGTAATCTCCAACAAA	TTTTTAACCAAG:TCTTCAAAGAAG	CT:CT	CT:CT	TACT:TACT	ACCTCCG:ACCTCCG	NA	CAAC:CAAC	CGAG:CGAG	CGAC:CGAC	CAAAAAGAGT:CAAAAAGAGT	CAAAAGAGT:CAAAAGAGT	NA	AA:CG	AG:AG	GTTAC:GTTAC	ATTGA:ATGA	GGA:GGA	GATATATATC:GATATATATC	NA	GAA:GAA	GAA:GAA	ATAAAATAG:ATAAAATAG	CA:CA	CG:CG	CAT:CAT	CCT:CCT	GGA:GGA	CAACT:CAAACT	TTTTTAACC:TCTTCAAAG	NA	TAAAAGAAGGT:TAAAAGAAGGT	ATCTTATAA:ATCTTATAA	AA	TCCCCTTCTCTCTCCG:TCCCCTTCTCTCTCCG	ATTAAA:ATTAAA	TAAGAAGT:TAAGAAGT	G:G	A:A	A:A	G:G	T:A	G:G	A:A	G:G
A-1250-35	TAC:TAC	ACCCCCCA:ACTCCCCCA	ACCCCCCCA:ACTCCCCCA	TGCTAAAT:TGCTAAAT	TGCTAAATTGAAAGGCTAATTACCATACGTGGTGGAAGATTGTAATCTCCAACAAA:TGCTAAATTGAAAGGCTAATTACCATACGTGGTGGAAGATTGTAATCTCCAACAAA	TTTTTAACCAAG:TCTTCAAAGAAG	CT:CT	CT:CT	TACT:TACT	ACCTCCG:ACCTCCG	NA	CAAC:CAAC	CGAG:CGAG	CGAC:CGAC	CAAAAAGAGT:CAAAAAGAGT	CAAAAGAGT:CAAAAGAGT	CGAAAGAGT:CGAAAGAGT	AA:AA	AG:AG	GTTAC:GTTAC	ATTGA:ATGA	GGA:GGA	GATATATATC:GATATATATC	NA	GAA:GAA	GAA:GAA	ATAAAATAG:ATAAAATAG	CA:CA	CG:CG	CAT:CAT	CCT:CCT	GGA:GGA	CAACT:CAAACT	TTTTTAACC:TCTTCAAAG	NA	TAAAAGAAGGT:TAAAAGAAGGT	ATCTTATAA:ATCTTATAA	AAACATACACAGCATGCGA:AAACATACACAGCATGCGA	TCCCCTTCTCTCTCCG:TCCCCTTCTCTCTCCG	ATTAAA:ATTAAA	TAAGAAGT:TAAGAAGT	G:G	A:A	A:A	G:G	T:A	G:G	A:A	G:G
A-1250-36	TAC:TAC	ACCCCCCA:ACTCCCCCA	ACCCCCCCA:ACTCCCCCA	TGCTAAAT:TGCTAAAT	TGCTAAATTGAAAGGCTAATTACCATACGTGGTGGAAGATTGTAATCTCCAACAAA:TGCTAAATTGAAAGGCTAATTACCATACGTGGTGGAAGATTGTAATCTCCAACAAA	TTTTTAACCAAG:TCTTCAAAGAAG	CT:CT	CT:CT	TACT:TACT	ACCTCCG:ACCTCCG	GCCTTCA:GCCTTCA	CAAC:CAAC	CGAG:CGAG	CGAC:CGAC	CAAAAAGAGT:CAAAAAGAGT	CAAAAGAGT:CAAAAGAGT	CGAAAGAGT:CGAAAGAGT	AA:CG	AG:AG	GTTAC:GTTAC	ATTGA:ATGA	GGA:GGA	GATATATATC:GATATATATC	AC:AC	GAA:GAA	GAA:GAA	ATAAAATAG:ATAAAATAG	CA:CA	CG:CG	CAT:CAT	CCT:CCT	GGA:GGA	CAACT:CAAACT	TTTTTAACC:TCTTCAAAG	NA	TAAAAGAAGGT:TAAAAGAAGGT	ATCTTATAA:ATCTTATAA	AAACATACACAGCATGCGA:AAACATACACAGCATGCGA	TCCCCTTCTCTCTCCG:TCCCCTTCTCTCTCCG	ATTAAA:ATTAAA	TAAGAAGT:TAAGAAGT	G:G	A:A	A:A	G:G	T:A	G:G	A:A	G:G
A-1250-37	TAC:TAC	ACCCCCCA:ACTCCCCCA	ACCCCCCCA:ACTCCCCCA	TGCTAAAT:TGCTAAAT	TGCTAAATTGAAAGGCTAATTACCATACGTGGTGGAAGATTGTAATCTCCAACAAA:TGCTAAATTGAAAGGCTAATTACCATACGTGGTGGAAGATTGTAATCTCCAACAAA	TTTTTAACCAAG:TCTTCAAAGAAG	CT:CT	CT:CT	TACT:TACT	ACCTCCG:ACCTCCG	NA	CAAC:CAAC	CGAG:CGAG	CGAC:CGAC	CAAAAAGAGT:CAAAAAGAGT	CAAAAGAGT:CAAAAGAGT	CGAAAGAGT:CGAAAGAGT	AA:CG	AG:AG	GTTAC:GTTAC	ATTGA:ATGA	GGA:GGA	GATATATATC:GATATATATC	AC:AC	GAA:GAA	GAA:GAA	ATAAAATAG:ATAAAATAG	CA:CA	CG:CG	CAT:CAT	CCT:CCT	GGA:GGA	CAACT:CAAACT	TTTTTAACC:TCTTCAAAG	NA	TAAAAGAAGGT:TAAAAGAAGGT	ATCTTATAA:ATCTTATAA	AAACATACACAGCATGCGA:AAACATACACAGCATGCGA	TCCCCTTCTCTCTCCG:TCCCCTTCTCTCTCCG	ATTAAA:ATTAAA	TAAGAAGT:TAAGAAGT	G:G	A:A	A:A	G:G	T:A	G:G	A:A	G:G
A-1250-38	TAC:TAC	ACCCCCCA:ACTCCCCCA	ACCCCCCCA:ACTCCCCCA	TGCTAAAT:TGCTAAAT	TGCTAAATTGAAAGGCTAATTACCATACGTGGTGGAAGATTGTAATCTCCAACAAA:TGCTAAATTGAAAGGCTAATTACCATACGTGGTGGAAGATTGTAATCTCCAACAAA	TTTTTAACCAAG:TCTTCAAAGAAG	CT:CT	CT:CT	TACT:TACT	ACCTCCG:ACCTCCG	NA	CAAC:CAAC	CGAG:CGAG	CGAC:CGAC	CAAAAAGAGT:CAAAAAGAGT	CAAAAGAGT:CAAAAGAGT	CGAAAGAGT:CGAAAGAGT	AA:CG	AG:AG	GTTAC:GTTAC	ATTGA:ATGA	GGA:GGA	GATATATATC:GATATATATC	AC:AC	GAA:GAA	GAA:GAA	ATAAAATAG:ATAAAATAG	CA:CA	CG:CG	CAT:CAT	CCT:CCT	GGA:GGA	CAACT:CAAACT	TTTTTAACC:TCTTCAAAG	NA	TAAAAGAAGGT:TAAAAGAAGGT	ATCTTATAA:ATCTTATAA	AAACATACACAGCATGCGA:AAACATACACAGCATGCGA	TCCCCTTCTCTCTCCG:TCCCCTTCTCTCTCCG	ATTAAA:ATTAAA	TAAGAAGT:TAAGAAGT	G:G	A:A	A:A	G:G	T:A	G:G	A:A	G:G
A-1250-39	TAC:TAC	ACCCCCCA:ACTCCCCCA	ACCCCCCCA:ACTCCCCCA	TGCTAAAT:TGCTAAAT	TGCTAAATTGAAAGGCTAATTACCATACGTGGTGGAAGATTGTAATCTCCAACAAA:TGCTAAATTGAAAGGCTAATTACCATACGTGGTGGAAGATTGTAATCTCCAACAAA	TTTTTAACCAAG:TCTTCAAAGAAG	CT:CT	CT:CT	TACT:TACT	ACCTCCG:ACCTCCG	NA	CAAC:CAAC	CGAG:CGAG	CGAC:CGAC	CAAAAAGAGT:CAAAAAGAGT	CAAAAGAGT:CAAAAGAGT	CGAAAGAGT:CGAAAGAGT	AA:AA	AG:AG	GTTAC:GTTAC	ATTGA:ATGA	GGA:GGA	GATATATATC:GATATATATC	AC:AC	GAA:GAA	GAA:GAA	ATAAAATAG:ATAAAATAG	CA:CA	CG:CG	CAT:CAT	CCT:CCT	GGA:GGA	CAACT:CAAACT	TTTTTAACC:TCTTCAAAG	NA	TAAAAGAAGGT:TAAAAGAAGGT	ATCTTATAA:ATCTTATAA	AA	TCCCCTTCTCTCTCCG:TCCCCTTCTCTCTCCG	ATTAAA:ATTAAA	TAAGAAGT:TAAGAAGT	G:G	A:A	A:A	A:G	A:A	G:G	A:A	G:G
A-1250-40	TAC:TAC	ACCCCCCA:ACTCCCCCA	ACCCCCCCA:ACTCCCCCA	TGCTAAAT:TGCTAAAT	TGCTAAATTGAAAGGCTAATTACCATACGTGGTGGAAGATTGTAATCTCCAACAAA:TGCTAAATTGAAAGGCTAATTACCATACGTGGTGGAAGATTGTAATCTCCAACAAA	TTTTTAACCAAG:TCTTCAAAGAAG	CT:CT	CT:CT	TACT:TACT	ACCTCCG:ACCTCCG	NA	CAAC:CAAC	CGAG:CGAG	CGAC:CGAC	CAAAAAGAGT:CAAAAAGAGT	CAAAAGAGT:CAAAAGAGT	CGAAAGAGT:CGAAAGAGT	AA:CG	AG:AG	GTTAC:GTTAC	ATTGA:ATGA	GGA:GGA	GATATATATC:GGTATATATC	GT:GT	GAA:GAA	GAA:GAA	ATAAAATAG:ATAAAATAG	CA:CA	CG:CG	CAT:CAT	CCT:CCT	GGA:GGA	CAACT:CAACT	TTTTTAACC:TCTTCAAAG	NA	TAAAAGAAGGT:TAAAAGAAGGT	ATCTTATAA:ATCTTATAA	AA	TCCCCTTCTCTCTCCG:TCCCCTTCTCTCTCCG	ATTAAA:ATTAAA	TAAGAAGT:TAAGAAGT	G:G	A:A	A:A	A:G	A:A	G:G	A:A	G:G
A-1250-41	TAC:TAC	ACCCCCCA:ACTCCCCCA	ACCCCCCCA:ACTCCCCCA	TGCTAAAT:TGCTAAAT	TGCTAAATTGAAAGGCTAATTACCATACGTGGTGGAAGATTGTAATCTCCAACAAA:TGCTAAATTGAAAGGCTAATTACCATACGTGGTGGAAGATTGTAATCTCCAACAAA	TTTTTAACCAAG:TCTTCAAAGAAG	CT:CT	CT:CT	TACT:TACT	ACCTCCG:ACCTCCG	NA	CAAC:CAAC	CGAG:CGAG	CGAC:CGAC	CAAAAAGAGT:CAAAAAGAGT	CAAAAGAGT:CAAAAGAGT	CGAAAGAGT:CGAAAGAGT	AA:AA	AG:AG	GTTAC:GTTAC	ATTGA:ATGA	GGA:GGA	GATATATATC:GATATATATC	AC:AC	GAA:GAA	GAA:GAA	ATAAAATAG:ATAAAATAG	CA:CA	CG:CG	CAT:CAT	CCT:CCT	GGA:GGA	CAACT:CAAACT	TTTTTAACC:TCTTCAAAG	NA	TAAAAGAAGGT:TAAAAGAAGGT	ATCTTATAA:ATCTTATAA	AAACATACACAGCATGCGA:AAACATACACAGCATGCGA	TCCCCTTCTCTCTCCG:TCCCCTTCTCTCTCCG	ATTAAA:ATTAAA	TAAGAAGT:TAAGAAGT	G:G	A:A	A:A	A:G	A:A	G:G	A:A	G:G
A-1250-42	TAC:TAC	ACCCCCCA:ACTCCCCCA	ACCCCCCCA:ACTCCCCCA	TGCTAAAT:TGCTAAAT	TGCTAAATTGAAAGGCTAATTACCATACGTGGTGGAAGATTGTAATCTCCAACAAA:TGCTAAATTGAAAGGCTAATTACCATACGTGGTGGAAGATTGTAATCTCCAACAAA	TCTTCAAAGAAG:TCTTCAAAGAAG	CT:CT	CT:CT	TACT:TACT	ACCTCCG:ACCTCCG	NA	CAAC:CAAC	CGAG:CGAG	CGAC:CGAC	CAAAAAGAGT:CAAAAAGAGT	CAAAAGAGT:CAAAAGAGT	CGAAAGAGT:CGAAAGAGT	AA:AA	AG:AG	GTTAC:GTTAC	ATTGA:ATGA	GGA:GGA	GATATATATC:GATATATATC	NA	GAA:GAA	GAA:GAA	ATAAAATAG:ATAAAATAG	CA:CA	CG:CG	CAT:CAT	CCT:CCT	GGA:GGA	CAACT:CAAACT	TCTTCAAAG:TCTTCAAAG	NA	TAAAAGAAGGT:TAAAAGAAGGT	ATCTTATAA:ATCTTATAA	AA	TCCCCTTCTCTCTCCG:TCCCCTTCTCTCTCCG	ATTAAA:ATTAAA	TAAGAAGT:TAAGAAGT	G:G	A:A	A:A	A:A	T:A	G:G	A:A	G:G
A-1250-43	TAC:TAC	ACCCCCCA:ACTCCCCCA	ACCCCCCCA:ACTCCCCCA	TGCTAAAT:TGCTAAAT	TGCTAAATTGAAAGGCTAATTACCATACGTGGTGGAAGATTGTAATCTCCAACAAA:TGCTAAATTGAAAGGCTAATTACCATACGTGGTGGAAGATTGTAATCTCCAACAAA	TTTTTAACCAAG:TCTTCAAAGAAG	CT:CT	CT:CT	TACT:TACT	ACCTCCG:ACCTCCG	NA	CAAC:CAAC	CGAG:CGAG	CGAC:CGAC	CAAAAAGAGT:CAAAAAGAGT	CAAAAGAGT:CAAAAGAGT	CGAAAGAGT:CGAAAGAGT	AA:CG	AG:AG	GTTAC:GTTAC	ATTGA:ATGA	GGA:GGA	GATATATATC:GGTATATATC	GT:GT	GAA:GAA	GAA:GAA	ATAAAATAG:ATAAAATAG	CA:CA	CG:CG	CAT:CAT	CCT:CCT	GGA:GGA	CAACT:CAAACT	TTTTTAACC:TCTTCAAAG	NA	TAAAAGAAGGT:TAAAAGAAGGT	ATCTTATAA:ATCTTATAA	AAACATACACAGCATGCGA:AAACATACACAGCATGCGA	TCCCCTTCTCTCTCCG:TCCCCTTCTCTCTCCG	ATTAAA:ATTAAA	TAAGAAGT:TAAGAAGT	G:G	A:A	A:A	A:G	T:A	G:G	A:A	G:G
A-1250-52	TAC:TAC	ACCCCCCA:ACTCCCCCA	ACCCCCCCA:ACTCCCCCA	TGCTAAAT:TGCTAAAT	TGCTAAATTGAAAGGCTAATTACCATACGTGGTGGAAGATTGTAATCTCCAACAAA:TGCTAAATTGAAAGGCTAATTACCATACGTGGTGGAAGATTGTAATCTCCAACAAA	TTTTTAACCAAG:TCTTCAAAGAAG	NA	CT:CT	TACT:TACT	ACCTCCG:ACCTCCG	ACCTCCT:GCCTTCA	CAAC:CAAC	CGAG:CGAG	NA	CAAAAAGAGT:CAAAAAGAGT	CAAAAGAGT:CAAAAGAGT	NA	AA:CG	AG:AG	GTTAC:GTTAC	ATTGA:ATGA	GGA:GGA	GATATATATC:GATATATATC	AC:AC	GAA:GAA	GAA:GAA	ATAAAATAG:ATAAAATAG	CA:CA	CG:CG	NA	CCT:CCT	GGA:GGA	CAACT:CAAACT	TTTTTAACC:TCTTCAAAG	NA	TAAAAGAAGGT:TAAAAGAAGGT	ATCTTATAA:ATCTTATAA	AA	TCCCCTTCTCTCTCCG:TCCCCTTCTCTCTCCG	ATTAAA:ATTAAA	TAAGAAGT:TAAGAAGT	G:G	A:A	A:A	A:G	A:A	G:G	A:A	G:G
A-1253-1	TAC:TAC	ACTCCCCCA:ACTCCCCCA	ACTCCCCCA:ACTCCCCCA	TGCTAAAT:TGCTAAAT	TGCTAAATTGAAAGGCTAATTACCATACGTGGTGGAAGATTGTAATCTCCAACAAA:TGCTAAATTGAAAGGCTAATTACCATACGTGGTGGAAGATTGTAATCTCCAACAAA	TTTTTAACCAAG:TCTTCAAAGAAG	CT:CT	CT:CT	TACT:TACT	ACCTCCG:ACCTCCG	ACCTCCT:ACCTCCT	CAAC:CAAC	CGAG:CGAG	CGAC:CGAC	CAAAAAGAGT:CAAAAAGAGT	CAAAAGAGT:CAAAAGAGT	CGAAAGAGT:CGAAAGAGT	AA:CG	AG:AG	GTTAC:GTTAC	ATTGA:ATGA	GGA:GGA	GATATATATC:GATATATATC	AC:AC	GAA:GAA	GAA:GAA	ATAAAATAG:ATAAAATAG	CA:CA	CG:CG	CAT:CAT	CCT:CCT	GGA:GGA	CAACT:CAAACT	TTTTTAACC:TCTTCAAAG	NA	TAAAAGAAGGT:TAAAAGAAGGT	ATCTTATAA:ATCTTATAA	AA	TCCCCTTCTCTCTCCG:TCCCCTTCTCTCTCCG	ATTAAA:ATTAAA	NA	G:G	A:A	A:A	A:G	NA	G:G	A:A	G:C
A-1253-2	TAC:TAC	ACTCCCCCA:ACTCCCCCA	ACTCCCCCA:ACTCCCCCA	TGCTAAAT:TGCTAAAT	TGCTAAATTGAAAGGCTAATTACCATACGTGGTGGAAGATTGTAATCTCCAACAAA:TGCTAAATTGAAAGGCTAATTACCATACGTGGTGGAAGATTGTAATCTCCAACAAA	TTTTTAACCAAG:TCTTCAAAGAAG	CT:CT	CT:CT	TACT:TACT	ACCTCCG:ACCTCCG	ACCTCCT:ACCTCCT	CAAC:CAAC	CGAG:CGAG	CGAC:CGAC	CAAAAAGAGT:CAAAAAGAGT	CAAAAGAGT:CAAAAGAGT	CGAAAGAGT:CGAAAGAGT	AA:CG	AG:AG	GTTAC:GTTAC	ATTGA:ATGA	GGA:GGA	GATATATATC:GGTATATATC	AC:GT	GAA:GAA	GAA:GAA	ATAAAATAG:ATAAAATAG	CA:CA	CG:CG	CAT:CAT	CCT:CCT	GGA:GGA	CAACT:CAACT	TTTTTAACC:TCTTCAAAG	NA	TAAAAGAAGGT:TAAAAGAAGGT	ATCTTATAA:ATCTTATAA	AA	TCCCCTTCTCTCTCCG:TCCCCTTCTCTCTCCG	ATTAAA:ATTAAA	TAAGAAGT:TAAGAAGT	G:G	A:A	A:A	A:G	T:A	G:G	NA	G:G
A-1253-4	TAC:TAC	ACTCCCCCA:ACTCCCCCA	ACTCCCCCA:ACTCCCCCA	TGCTAAAT:TGCTAAAT	TGCTAAATTGAAAGGCTAATTACCATACGTGGTGGAAGATTGTAATCTCCAACAAA:TGCTAAATTGAAAGGCTAATTACCATACGTGGTGGAAGATTGTAATCTCCAACAAA	TTTTTAACCAAG:TCTTCAAAGAAG	CT:CT	CT:CT	TACT:TACT	ACCTCCG:ACCTCCG	ACCTCCT:ACCTCCT	CAAC:CAAC	CGAG:CGAG	CGAC:CGAC	CAAAAAGAGT:CAAAAAGAGT	CAAAAGAGT:CAAAAGAGT	NA	AA:CG	AG:AG	GTTAC:GTTAC	ATTGA:ATGA	GGA:GGA	GATATATATC:GGTATATATC	AC:GT	GAA:GAA	GAA:GAA	ATAAAATAG:ATAAAATAG	CA:CA	CG:CG	CAT:CAT	CCT:CCT	GGA:GGA	CAACT:CAAACT	TTTTTAACC:TCTTCAAAG	NA	TAAAAGAAGGT:TAAAAGAAGGT	ATCTTATAA:ATCTTATAA	AA	TCCCCTTCTCTCTCCG:TCCCCTTCTCTCTCCG	ATTAAA:ATTAAA	TAAGAAGT:TAAGAAGT	G:G	A:A	A:A	A:G	T:A	G:G	A:A	G:G
A-1253-6	TAC:TAC	ACTCCCCCA:ACTCCCCCA	ACTCCCCCA:ACTCCCCCA	TGCTAAAT:TGCTAAAT	TGCTAAATTGAAAGGCTAATTACCATACGTGGTGGAAGATTGTAATCTCCAACAAA:TGCTAAATTGAAAGGCTAATTACCATACGTGGTGGAAGATTGTAATCTCCAACAAA	TTTTTAACCAAG:TCTTCAAAGAAG	CT:CT	CT:CT	TACT:TACT	ACCTCCG:ACCTCCG	ACCTCCT:ACCTCCT	CAAC:CAAC	CGAG:CGAG	CGAC:CGAC	CAAAAAGAGT:CAAAAAGAGT	CAAAAGAGT:CAAAAGAGT	NA	AA:AA	AG:AG	GTTAC:GTTAC	ATTGA:ATGA	GGA:GGA	GATATATATC:GATATATATC	AC:AC	GAA:GAA	GAA:GAA	ATAAAATAG:ATAAAATAG	CA:CA	CG:CG	CAT:CAT	CCT:CCT	GGA:GGA	CAACT:CAAACT	Uncallable	NA	TAAAAGAAGGT:TAAAAGAAGGT	ATCTTATAA:ATCTTATAA	AA	TCCCCTTCTCTCTCCG:TCCCCTTCTCTCTCCG	ATTAAA:ATTAAA	TAAGAAGT:TAAGAAGT	G:G	A:A	A:A	A:A	NA	G:G	A:A	G:C
A-1253-8	TAC:TAC	ACTCCCCCA:ACTCCCCCA	ACTCCCCCA:ACTCCCCCA	TGCTAAAT:TGCTAAAT	TGCTAAATTGAAAGGCTAATTACCATACGTGGTGGAAGATTGTAATCTCCAACAAA:TGCTAAATTGAAAGGCTAATTACCATACGTGGTGGAAGATTGTAATCTCCAACAAA	TTTTTAACCAAG:TCTTCAAAGAAG	CT:CT	CT:CT	TACT:TACT	ACCTCCG:ACCTCCG	ACCTCCT:ACCTCCT	CAAC:CAAC	CGAG:CGAG	CGAC:CGAC	CAAAAAGAGT:CAAAAAGAGT	CAAAAGAGT:CAAAAGAGT	CGAAAGAGT:CGAAAGAGT	AA:CG	AG:AG	GTTAC:GTTAC	ATTGA:ATGA	GGA:GGA	GATATATATC:GGTATATATC	AC:GT	GAA:GAA	GAA:GAA	ATAAAATAG:ATAAAATAG	CA:CA	CG:CG	CAT:CAT	CCT:CCT	GGA:GGA	CAACT:CAAACT	TTTTTAACC:TCTTCAAAG	NA	TAAAAGAAGGT:TAAAAGAAGGT	ATCTTATAA:ATCTTATAA	AA	TCCCCTTCTCTCTCCG:TCCCCTTCTCTCTCCG	ATTAAA:ATTAAA	TAAGAAGT:TAGAAGT	G:G	A:A	A:A	A:G	T:A	G:G	A:A	G:G
A-1253-9	TAC:TAC	ACTCCCCCA:ACTCCCCCA	ACTCCCCCA:ACTCCCCCA	TGCTAAAT:TGCTAAAT	TGCTAAATTGAAAGGCTAATTACCATACGTGGTGGAAGATTGTAATCTCCAACAAA:TGCTAAATTGAAAGGCTAATTACCATACGTGGTGGAAGATTGTAATCTCCAACAAA	TTTTTAACCAAG:TCTTCAAAGAAG	CT:CT	CT:CT	TACT:TACT	ACCTCCG:ACCTCCG	ACCTCCT:ACCTCCT	CAAC:CAAC	CGAG:CGAG	CGAC:CGAC	CAAAAAGAGT:CAAAAAGAGT	CAAAAGAGT:CAAAAGAGT	NA	AA:CG	AG:AG	GTTAC:GTTAC	ATTGA:ATGA	GGA:GGA	GATATATATC:GGTATATATC	GT:GT	GAA:GAA	GAA:GAA	ATAAAATAG:ATAAAATAG	CA:CA	CG:CG	CAT:CAT	CCT:CCT	GGA:GGA	CAACT:CAACT	TTTTTAACC:TCTTCAAAG	NA	TAAAAGAAGGT:TAAAAGAAGGT	ATCTTATAA:ATCTTATAA	AA	TCCCCTTCTCTCTCCG:TCCCCTTCTCTCTCCG	ATTAAA:ATTAAA	TAAGAAGT:TAGAAGT	G:G	A:A	A:A	A:G	T:A	G:G	A:A	G:G
A-1253-10	TAC:TAC	ACTCCCCCA:ACTCCCCCA	ACTCCCCCA:ACTCCCCCA	TGCTAAAT:TGCTAAAT	TGCTAAATTGAAAGGCTAATTACCATACGTGGTGGAAGATTGTAATCTCCAACAAA:TGCTAAATTGAAAGGCTAATTACCATACGTGGTGGAAGATTGTAATCTCCAACAAA	TTTTTAACCAAG:TCTTCAAAGAAG	CT:CT	CT:CT	TACT:TACT	ACCTCCG:ACCTCCG	ACCTCCT:ACCTCCT	CAAC:CAAC	CGAG:CGAG	CGAC:CGAC	CAAAAAGAGT:CAAAAAGAGT	CAAAAGAGT:CAAAAGAGT	NA	AA:CG	AG:AG	GTTAC:GTTAC	ATTGA:ATGA	GGA:GGA	GATATATATC:GATATATATC	AC:AC	GAA:GAA	GAA:GAA	ATAAAATAG:ATAAAATAG	CA:CA	CG:CG	CAT:CAT	CCT:CCT	GGA:GGA	CAACT:CAAACT	TTTTTAACC:TCTTCAAAG	NA	TAAAAGAAGGT:TAAAAGAAGGT	ATCTTATAA:ATCTTATAA	AA	TCCCCTTCTCTCTCCG:TCCCCTTCTCTCTCCG	ATTAAA:ATTAAA	TAAGAAGT:TAAGAAGT	G:G	A:A	A:A	A:G	T:A	G:G	A:A	G:G
A-1253-11	TAC:TAC	ACTCCCCCA:ACTCCCCCA	ACTCCCCCA:ACTCCCCCA	TGCTAAAT:TGCTAAAT	TGCTAAATTGAAAGGCTAATTACCATACGTGGTGGAAGATTGTAATCTCCAACAAA:TGCTAAATTGAAAGGCTAATTACCATACGTGGTGGAAGATTGTAATCTCCAACAAA	TTTTTAACCAAG:TCTTCAAAGAAG	CT:CT	CT:CT	TACT:TACT	ACCTCCG:ACCTCCG	ACCTCCT:ACCTCCT	CAAC:CAAC	CGAG:CGAG	CGAC:CGAC	CAAAAAGAGT:CAAAAAGAGT	CAAAAGAGT:CAAAAGAGT	NA	AA:AA	AG:AG	GTTAC:GTTAC	ATTGA:ATGA	GGA:GGA	GATATATATC:GGTATATATC	AC:GT	GAA:GAA	GAA:GAA	ATAAAATAG:ATAAAATAG	CA:CA	CG:CG	CAT:CAT	CCT:CCT	GGA:GGA	CAACT:CAACT	TTTTTAACC:TCTTCAAAG	NA	TAAAAGAAGGT:TAAAAGAAGGT	ATCTTATAA:ATCTTATAA	AA	TCCCCTTCTCTCTCCG:TCCCCTTCTCTCTCCG	ATTAAA:ATTAAA	TAAGAAGT:TAGAAGT	G:G	A:A	A:A	A:G	A:A	G:G	A:A	G:G
A-1253-12	TAC:TAC	ACTCCCCCA:ACTCCCCCA	ACTCCCCCA:ACTCCCCCA	TGCTAAAT:TGCTAAAT	NA	TTTTTAACCAAG:TCTTCAAAGAAG	CT:CT	CT:CT	TACT:TACT	NA	GCCTTCA:GCCTTCA	CAAC:CAAC	CGAG:CGAG	CGAC:CGAC	CAAAAAGAGT:CAAAAAGAGT	CAAAAGAGT:CAAAAGAGT	CGAAAGAGT:CGAAAGAGT	AA:AA	AG:AG	GTTAC:GTTAC	ATTGA:ATGA	GGA:GGA	GATATATATC:GGTATATATC	AC:GT	GAA:GAA	GAA:GAA	ATAAAATAG:ATAAAATAG	CA:CA	CG:CG	CAT:CAT	CCT:CCT	GGA:GGA	CAACT:CAAACT	TTTTTAACC:TCTTCAAAG	GC:GC	TAAAAGAAGGT:TAAAAGAAGGT	ATCTTATAA:ATCTTATAA	AA	TCCCCTTCTCTCTCCG:TCCCCTTCTCTCTCCG	ATTAAA:ATTAAA	TAAGAAGT:TAAGAAGT	G:G	A:A	A:A	A:G	A:A	G:G	A:A	G:G
A-1253-13	TAC:TAC	ACTCCCCCA:ACTCCCCCA	ACTCCCCCA:ACTCCCCCA	TGCTAAAT:TGCTAAAT	TGCTAAATTGAAAGGCTAATTACCATACGTGGTGGAAGATTGTAATCTCCAACAAA:TGCTAAATTGAAAGGCTAATTACCATACGTGGTGGAAGATTGTAATCTCCAACAAA	TTTTTAACCAAG:TCTTCAAAGAAG	CT:CT	CT:CT	TACT:TACT	ACCTCCG:ACCTCCG	ACCTCCT:ACCTCCT	CAAC:CAAC	CGAG:CGAG	CGAC:CGAC	CAAAAAGAGT:CAAAAAGAGT	CAAAAGAGT:CAAAAGAGT	CGAAAGAGT:CGAAAGAGT	AA:AA	AG:AG	GTTAC:GTTAC	ATTGA:ATGA	GGA:GGA	GATATATATC:GGTATATATC	AC:GT	GAA:GAA	GAA:GAA	ATAAAATAG:ATAAAATAG	CA:CA	CG:CG	CAT:CAT	CCT:CCT	GGA:GGA	CAACT:CAACT	TTTTTAACC:TCTTCAAAG	NA	TAAAAGAAGGT:TAAAAGAAGGT	ATCTTATAA:ATCTTATAA	AA	TCCCCTTCTCTCTCCG:TCCCCTTCTCTCTCCG	ATTAAA:ATTAAA	TAAGAAGT:TAGAAGT	G:G	A:A	A:A	A:G	T:A	G:G	A:A	G:G
A-1253-14	TAC:TAC	ACTCCCCCA:ACTCCCCCA	ACTCCCCCA:ACTCCCCCA	TGCTAAAT:TGCTAAAT	TGCTAAATTGAAAGGCTAATTACCATACGTGGTGGAAGATTGTAATCTCCAACAAA:TGCTAAATTGAAAGGCTAATTACCATACGTGGTGGAAGATTGTAATCTCCAACAAA	TTTTTAACCAAG:TCTTCAAAGAAG	CT:CT	CT:CT	TACT:TACT	ACCTCCG:ACCTCCG	ACCTCCT:ACCTCCT	CAAC:CAAC	CGAG:CGAG	CGAC:CGAC	CAAAAAGAGT:CAAAAAGAGT	CAAAAGAGT:CAAAAGAGT	CGAAAGAGT:CGAAAGAGT	AA:CG	AG:AG	GTTAC:GTTAC	ATTGA:ATGA	GGA:GGA	GATATATATC:GATATATATC	AC:AC	GAA:GAA	GAA:GAA	NA	CA:CA	CG:CG	CAT:CAT	CCT:CCT	GGA:GGA	CAACT:CAACT	TTTTTAACC:TCTTCAAAG	NA	TAAAAGAAGGT:TAAAAGAAGGT	ATCTTATAA:ATCTTATAA	AA	TCCCCTTCTCTCTCCG:TCCCCTTCTCTCTCCG	ATTAAA:ATTAAA	TAAGAAGT:TAGAAGT	G:G	A:A	A:A	A:G	T:A	G:G	A:A	G:G
A-1253-15	TAC:TAC	ACTCCCCCA:ACTCCCCCA	ACTCCCCCA:ACTCCCCCA	TGCTAAAT:TGCTAAAT	TGCTAAATTGAAAGGCTAATTACCATACGTGGTGGAAGATTGTAATCTCCAACAAA:TGCTAAATTGAAAGGCTAATTACCATACGTGGTGGAAGATTGTAATCTCCAACAAA	TTTTTAACCAAG:TCTTCAAAGAAG	CT:CT	CT:CT	TACT:TACT	ACCTCCG:ACCTCCG	ACCTCCT:ACCTCCT	CAAC:CAAC	CGAG:CGAG	CGAC:CGAC	CAAAAAGAGT:CAAAAAGAGT	CAAAAGAGT:CAAAAGAGT	CGAAAGAGT:CGAAAGAGT	AA:AA	AG:AG	GTTAC:GTTAC	ATTGA:ATGA	GGA:GGA	GATATATATC:GATATATATC	AC:AC	GAA:GAA	GAA:GAA	ATAAAATAG:ATAAAATAG	CA:CA	CG:CG	CAT:CAT	CCT:CCT	GGA:GGA	CAACT:CAAACT	TTTTTAACC:TCTTCAAAG	NA	TAAAAGAAGGT:TAAAAGAAGGT	ATCTTATAA:ATCTTATAA	AA	TCCCCTTCTCTCTCCG:TCCCCTTCTCTCTCCG	ATTAAA:ATTAAA	TAAGAAGT:TAGAAGT	G:G	A:A	A:A	A:G	A:A	G:G	A:A	G:C
A-1253-17	TAC:TAC	ACTCCCCCA:ACTCCCCCA	ACTCCCCCA:ACTCCCCCA	TGCTAAAT:TGCTAAAT	TGCTAAATTGAAAGGCTAATTACCATACGTGGTGGAAGATTGTAATCTCCAACAAA:TGCTAAATTGAAAGGCTAATTACCATACGTGGTGGAAGATTGTAATCTCCAACAAA	TTTTTAACCAAG:TCTTCAAAGAAG	CT:CT	CT:CT	TACT:TACT	ACCTCCG:ACCTCCG	NA	CAAC:CAAC	CGAG:CGAG	NA	CAAAAAGAGT:CAAAAAGAGT	CAAAAGAGT:CAAAAGAGT	NA	AA:CG	AG:AG	GTTAC:GTTAC	ATTGA:ATGA	GGA:GGA	GATATATATC:GATATATATC	AC:AC	GAA:GAA	GAA:GAA	ATAAAATAG:ATAAAATAG	CA:CA	CG:CG	CAT:CAT	CCT:CCT	GGA:GGA	CAACT:CAACT	TTTTTAACC:TCTTCAAAG	NA	TAAAAGAAGGT:TAAAAGAAGGT	ATCTTATAA:ATCTTATAA	AA	TCCCCTTCTCTCTCCG:TCCCCTTCTCTCTCCG	ATTAAA:ATTAAA	TAAGAAGT:TAGAAGT	G:G	A:A	A:A	A:G	T:A	G:G	A:A	G:G
A-1253-19	TAC:TAC	ACTCCCCCA:ACTCCCCCA	ACTCCCCCA:ACTCCCCCA	TGCTAAAT:TGCTAAAT	TGCTAAATTGAAAGGCTAATTACCATACGTGGTGGAAGATTGTAATCTCCAACAAA:TGCTAAATTGAAAGGCTAATTACCATACGTGGTGGAAGATTGTAATCTCCAACAAA	TTTTTAACCAAG:TCTTCAAAGAAG	CT:CT	CT:CT	TACT:TACT	ACCTCCG:ACCTCCG	ACCTCCT:ACCTCCT	CAAC:CAAC	CGAG:CGAG	CGAC:CGAC	CAAAAAGAGT:CAAAAAGAGT	CAAAAGAGT:CAAAAGAGT	NA	AA:CG	AG:AG	GTTAC:GTTAC	ATTGA:ATGA	GGA:GGA	GATATATATC:GGTATATATC	AC:GT	GAA:GAA	GAA:GAA	ATAAAATAG:ATAAAATAG	CA:CA	CG:CG	CAT:CAT	CCT:CCT	GGA:GGA	CAACT:CAAACT	TTTTTAACC:TCTTCAAAG	NA	TAAAAGAAGGT:TAAAAGAAGGT	ATCTTATAA:ATCTTATAA	AA	TCCCCTTCTCTCTCCG:TCCCCTTCTCTCTCCG	ATTAAA:ATTAAA	TAAGAAGT:TAAGAAGT	G:G	A:A	A:A	A:A	T:A	G:G	A:A	G:G
A-1253-21	TAC:TAC	ACTCCCCCA:ACTCCCCCA	ACTCCCCCA:ACTCCCCCA	TGCTAAAT:TGCTAAAT	TGCTAAATTGAAAGGCTAATTACCATACGTGGTGGAAGATTGTAATCTCCAACAAA:TGCTAAATTGAAAGGCTAATTACCATACGTGGTGGAAGATTGTAATCTCCAACAAA	TTTTTAACCAAG:TCTTCAAAGAAG	CT:CT	CT:CT	TACT:TACT	ACCTCCG:ACCTCCG	ACCTCCT:ACCTCCT	CAAC:CAAC	CGAG:CGAG	CGAC:CGAC	CAAAAAGAGT:CAAAAAGAGT	CAAAAGAGT:CAAAAGAGT	NA	AA:AA	AG:AG	GTTAC:GTTAC	ATTGA:ATGA	GGA:GGA	GATATATATC:GGTATATATC	AC:GT	GAA:GAA	GAA:GAA	ATAAAATAG:ATAAAATAG	CA:CA	CG:CG	CAT:CAT	CCT:CCT	GGA:GGA	CAACT:CAAACT	TTTTTAACC:TCTTCAAAG	NA	TAAAAGAAGGT:TAAAAGAAGGT	ATCTTATAA:ATCTTATAA	AA	TCCCCTTCTCTCTCCG:TCCCCTTCTCTCTCCG	ATTAAA:ATTAAA	TAAGAAGT:TAGAAGT	G:G	A:A	A:A	A:G	A:A	G:G	A:A	G:G
A-1261-25	TAA:TAC	ACCCCCCA:ACTCCCCCA	ACCCCCCCA:ACTCCCCCA	NA	TGCTAAATTGAAAGGCTAATTACCATACGTGGTGGAAGATTGTAATCTCCAACAAA:TTTAG	TTTTTAACCAAG:TCTTCAAAGAAG	CT:CT	CT:CT	TACT:TACT	ACCTCCG:ACCTCCG	ACCTCCT:ACCTCCT	CAAC:CAAC	CGAG:CGAG	CGAC:CGAC	CAAAAAGAGT:CAAAAAGAGT	CAAAAGAGT:CAAAAGAGT	CGAAAGAGT:CGAAAGAGT	AA:CG	AG:AG	GTTAC:GTTAC	ATTGA:ATGA	GGA:GGA	GATATATATC:GATATATATC	AC:AC	GAA:GAA	GAA:GAA	ATAAAATAG:ATAAAATAG	CA:CA	CG:CG	CAT:CAT	CCT:CCT	GGA:GGA	CAACT:CAAACT	TTTTTAACC:TCTTCAAAG	GC:GC	TAAAAGAAGGT:TAAAAGAAGGT	ATCTTATAA:ATCTTATAA	AA	TCCCCTTCTCTCTCCG:TCCCCTTCTCTCTCCG	ATTAAA:ATTAAA	TAAGAAGT:TAAGAAGT	G:G	A:A	A:A	A:G	NA	G:G	A:A	G:G
A-1261-28	TAA:TAC	ACTCCCCCA:ACTCCCCCA	ACTCCCCCA:ACTCCCCCA	TT:TGCTAAAT	TGCTAAATTGAAAGGCTAATTACCATACGTGGTGGAAGATTGTAATCTCCAACAAA:TTTAG	TTTTTAACCAAG:TCTTCAAAGAAG	CT:CT	CT:CT	TACT:TACT	ACCTCCG:GCCTTCA	GCCTTCA:GCCTTCA	CAAC:CAAC	CGAG:CGAG	CGAC:CGAC	CAAAAAGAGT:CAAAAAGAGT	CAAAAGAGT:CAAAAGAGT	CGAAAGAGT:CGAAAGAGT	AA:CG	AG:AG	GTTAC:GTTAC	ATTGA:ATGA	GGA:GGA	GATATATATC:GGTATATATC	AC:GT	GAA:GAA	GAA:GAA	ATAAAATAG:ATAAAATAG	CA:CA	CG:CG	CAT:CAT	CCT:CCT	GGA:GGA	CAACT:CAAACT	TTTTTAACC:TCTTCAAAG	GC:GC	TAAAAGAAGGT:TAAAAGAAGGT	ATCTTATAA:ATCTTATAA	AA	TCCCCTTCTCTCTCCG:TCCCCTTCTCTCTCCG	ATTAAA:ATTAAA	TAAGAAGT:TAGAAGT	G:G	A:A	A:A	A:G	T:A	G:G	A:A	G:G
A-1261-29	TAC:TAC	ACCCCCCA:ACTCCCCCA	ACCCCCCCA:ACTCCCCCA	TGCTAAAT:TGCTAAAT	TGCTAAATTGAAAGGCTAATTACCATACGTGGTGGAAGATTGTAATCTCCAACAAA:TGCTAAATTGAAAGGCTAATTACCATACGTGGTGGAAGATTGTAATCTCCAACAAA	TTTTTAACCAAG:TCTTCAAAGAAG	CT:CT	CT:CT	TACT:TACT	ACCTCCG:ACCTCCG	NA	CAAC:CAAC	CGAG:CGAG	CGAC:CGAC	CAAAAAGAGT:CAAAAAGAGT	CAAAAGAGT:CAAAAGAGT	CGAAAGAGT:CGAAAGAGT	AA:CG	AG:AG	GTTAC:GTTAC	NA	GGA:GGA	GATATATATC:GGTATATATC	AC:GT	GAA:GAA	GAA:GAA	ATAAAATAG:ATAAAATAG	CA:CA	CG:CG	CAT:CAT	CCT:CCT	GGA:GGA	CAACT:CAAACT	TTTTTAACC:TCTTCAAAG	NA	TAAAAGAAGGT:TAAAAAGAAGGT	ATCTTATAA:ATCTTATAA	AA	TCCCCTTCTCTCTCCG:TCCCCTTCTCTCTCCG	ATTAAA:ATTAAA	TAAGAAGT:TAGAAGT	G:G	A:A	A:A	A:G	T:A	G:G	A:A	G:G
A-1261-30	TAA:TAC	ACCCCCCA:ACTCCCCCA	ACCCCCCCA:ACTCCCCCA	TT:TGCTAAAT	TGCTAAATTGAAAGGCTAATTACCATACGTGGTGGAAGATTGTAATCTCCAACAAA:TTTAG	TTTTTAACCAAG:TCTTCAAAGAAG	CT:CT	CT:CT	TACT:TACT	ACCTCCG:GCCTTCA	ACCTCCT:GCCTTCA	CAAC:CAAC	CGAG:CGAG	CGAC:CGAC	CAAAAAGAGT:CAAAAAGAGT	CAAAAGAGT:CAAAAGAGT	CGAAAGAGT:CGAAAGAGT	AA:CG	AG:AG	GTTAC:GTTAC	NA	GGA:GGA	GATATATATC:GATATATATC	NA	GAA:GAA	GAA:GAA	ATAAAATAG:ATAAAATAG	CA:CA	CG:CG	CAT:CAT	CCT:CCT	GGA:GGA	CAACT:CAAACT	TTTTTAACC:TCTTCAAAG	GC:GC	TAAAAGAAGGT:TAAAAAGAAGGT	ATCTTATAA:ATCTTATAA	AA	TCCCCTTCTCTCTCCG:TCCCCTTCTCTCTCCG	ATTAAA:ATTAAA	TAAGAAGT:TAGAAGT	G:G	A:A	A:A	A:G	T:A	G:G	A:A	G:G
A-1261-31	TAA:TAC	ACCCCCCA:ACTCCCCCA	ACCCCCCCA:ACTCCCCCA	TGCTAAAT:TGCTAAAT	TGCTAAATTGAAAGGCTAATTACCATACGTGGTGGAAGATTGTAATCTCCAACAAA:TGCTAAATTGAAAGGCTAATTACCATACGTGGTGGAAGATTGTAATCTCCAACAAA	TTTTTAACCAAG:TCTTCAAAGAAG	CT:CT	CT:CT	TACT:TACT	ACCTCCG:ACCTCCG	ACCTCCT:ACCTCCT	CAAC:CAAC	CGAG:CGAG	CGAC:CGAC	CAAAAAGAGT:CAAAAAGAGT	CAAAAGAGT:CAAAAGAGT	CGAAAGAGT:CGAAAGAGT	AA:CG	AG:AG	GTTAC:GTTAC	ATTGA:ATGA	GGA:GGA	GATATATATC:GGTATATATC	GT:GT	GAA:GAA	GAA:GAA	ATAAAATAG:ATAAAATAG	CA:CA	CG:CG	CAT:CAT	CCT:CCT	GGA:GGA	CAACT:CAAACT	TTTTTAACC:TCTTCAAAG	GC:GC	TAAAAGAAGGT:TAAAAGAAGGT	ATCTTATAA:ATCTTATAA	AA	TCCCCTTCTCTCTCCG:TCCCCTTCTCTCTCCG	ATTAAA:ATTAAA	TAAGAAGT:TAAGAAGT	G:G	A:A	A:A	A:G	T:A	G:G	A:A	G:G
A-1261-32	TAA:TAC	ACCCCCCA:ACTCCCCCA	ACCCCCCCA:ACTCCCCCA	NA	TGCTAAATTGAAAGGCTAATTACCATACGTGGTGGAAGATTGTAATCTCCAACAAA:TGCTAAATTGAAAGGCTAATTACCATACGTGGTGGAAGATTGTAATCTCCAACAAA	TTTTTAACCAAG:TCTTCAAAGAAG	CT:CT	CT:CT	TACT:TACT	GCCTTCA:GCCTTCA	ACCTCCT:GCCTTCA	CAAC:CAAC	CGAG:CGAG	CGAC:CGAC	CAAAAAGAGT:CAAAAAGAGT	CAAAAGAGT:CAAAAGAGT	CGAAAGAGT:CGAAAGAGT	AA:CG	AG:AG	GTTAC:GTTAC	ATTGA:ATGA	GGA:GGA	GATATATATC:GATATATATC	AC:AC	GAA:GAA	GAA:GAA	ATAAAATAG:ATAAAATAG	CA:CA	CG:CG	CAT:CAT	CCT:CCT	GGA:GGA	CAACT:CAAACT	TTTTTAACC:TCTTCAAAG	GC:GC	TAAAAGAAGGT:TAAAAGAAGGT	ATCTTATAA:ATCTTATAA	AA	TCCCCTTCTCTCTCCG:TCCCCTTCTCTCTCCG	ATTAAA:ATTAAA	TAAGAAGT:TAAGAAGT	G:G	A:A	A:A	A:G	T:A	G:G	A:A	G:G
A-1261-33	TAA:TAC	ACCCCCCA:ACTCCCCCA	ACCCCCCCA:ACTCCCCCA	TT:TGCTAAAT	TGCTAAATTGAAAGGCTAATTACCATACGTGGTGGAAGATTGTAATCTCCAACAAA:TTTAG	TTTTTAACCAAG:TTTTTAACCAAG	CT:CT	CT:CT	TACT:TACT	ACCTCCG:ACCTCCG	ACCTCCT:ACCTCCT	CAAC:CAAC	CGAG:CGAG	CGAC:CGAC	CAAAAAGAGT:CAAAAAGAGT	CAAAAGAGT:CAAAAGAGT	CGAAAGAGT:CGAAAGAGT	AA:CG	AG:AG	GTTAC:GTTAC	NA	GGA:GGA	GATATATATC:GGTATATATC	AC:GT	GAA:GAA	GAA:GAA	ATAAAATAG:ATAAAATAG	CA:CA	CG:CG	CAT:CAT	CCT:CCT	GGA:GGA	CAACT:CAAACT	TTTTTAACC:TTTTTAACC	GC:GC	TAAAAGAAGGT:TAAAAAGAAGGT	ATCTTATAA:ATCTTATAA	AA	TCCCCTTCTCTCTCCG:TCCCCTTCTCTCTCCG	ATTAAA:ATTAAA	TAAGAAGT:TAGAAGT	G:G	A:A	A:A	A:G	T:A	G:G	A:A	G:G
ORUS 4534B	TAA:TAA	ACTCCCCCA:ACTCCCCCA	ACTCCCCCA:ACTCCCCCA	TGCTAAAT:TGCTAAAT	TGCTAAATTGAAAGGCTAATTACCATACGTGGTGGAAGATTGTAATCTCCAACAAA:TGCTAAATTGAAAGGCTAATTACCATACGTGGTGGAAGATTGTAATCTCCAACAAA	TTTTTAACCAAG:TCTTCAAAGAAG	TC:CT	TT:CT	TAAA:TACT	ACCTCCG:GCCTTCA	ACCTCCT:GCCTTCA	CAAC:GGAG	CGAG:GGAG	CGAC:GGAG	CAAAAAGAGT:CAAAAAGAGT	CAAAGAGT:CAAAAGAGT	CGAAAGAGT:CGAAAGAGT	AA:CG	AG:AG	GTTAC:GTTAC	ATTGA:ATTGA	GGA:AGA	GATATATATC:GGTATATATC	AC:AC	GCA:GAA	GCG:GAA	ATAAAATAG:ATAAAATAG	CA:CA	CG:CG	CAT:CAT	CCT:CCT	GGAAATGGAAATAGA:GGAAATGGAAATAGA	CAACT:CAACT	TTTTTAACC:TCTTCAAAG	GC:GC	TAAAAGAAGGT:TAAAAAGAAGGT	ATTATAA:ATCTTATAA	AA	TCCCCTTCTCTCTCTG:TCCCCTTCTCTCTCTG	ATTAAA:ATTAAA	TAAGAAGT:TAAGAAGT	G:G	A:A	A:G	A:G	A:A	G:G	A:A	G:G
ORUS 4534C	TAA:TAA	ACTCCCCCA:ACTCCCCCA	ACTCCCCCA:ACTCCCCCA	TGCTAAAT:TGCTAAAT	TGCTAAATTGAAAGGCTAATTACCATACGTGGTGGAAGATTGTAATCTCCAACAAA:TGCTAAATTGAAAGGCTAATTACCATACGTGGTGGAAGATTGTAATCTCCAACAAA	TTTTTAACCAAG:TCTTCAAAGAAG	TC:CT	TT:CT	TAAA:TACT	ACCTCCG:GCCTTCA	ACCTCCT:GCCTTCA	CAAC:GGAG	CGAG:GGAG	CGAC:GGAG	CAAAAAGAGT:CAAAAAGAGT	CAAAGAGT:CAAAAGAGT	CGAAAGAGT:CGAAAGAGT	AA:CG	AG:CG	Bad	ATTGA:ATTGA	GGA:AGA	GATATATATC:GGTATATATC	AC:AC	GCA:GAA	GCG:GAA	ATAAAATAG:ATGAAATAG	CA:TG	CG:TG	CAT:GAA	CCT:GAA	GGA:GGAAATGGAAATAGA	CAACT:CAACT	TTTTTAACC:TCTTCAAAG	GC:GCTTTGCC	TAAAAGAAGGT:TAAAAAGAAGGT	ATTATAA:ATCTTATAA	AAACATACACAGCATGCGA:AAACATACACAGCATGCGA	TCCCCTTCTCTCTCTG:TCCCCTTCTCTCTCTG	ATTAAA:ATTAAA	TAAGAAGT:TAAGAAGT	G:G	A:A	A:G	A:G	A:A	G:G	A:A	G:G
ORUS 4534E	TAA:TAA	ACTCCCCCA:ACTCCCCCA	ACTCCCCCA:ACTCCCCCA	TGCTAAAT:TGCTAAAT	TGCTAAATTGAAAGGCTAATTACCATACGTGGTGGAAGATTGTAATCTCCAACAAA:TGCTAAATTGAAAGGCTAATTACCATACGTGGTGGAAGATTGTAATCTCCAACAAA	TTTTTAACCAAG:TCTTCAAAGAAG	TC:CT	TT:CT	TAAA:TACT	ACCTCCG:GCCTTCA	ACCTCCT:GCCTTCA	CAAC:GGAG	CGAG:GGAG	CGAC:GGAG	CAAAAAGAGT:CAAAAAGAGT	CAAAAGAGT:CAAAAGAGT	CGAAAGAGT:CGAAAGAGT	AA:CG	AG:CG	GTTAC:GTTAC	ATTGA:ATTGA	GGA:AGA	GATATATATC:GGTATATATC	NA	GCA:GAA	GCG:GAA	ATAAAATAG:ATGAAATAG	CA:TG	CG:TG	CAT:GAA	CCT:GAA	GGA:GGAAATGGAAATAGA	CAACT:CAACT	TTTTTAACC:TCTTCAAAG	GC:GCTTTGCC	TAAAAGAAGGT:TAAAAGAAGGT	ATTATAA:ATCTTATAA	AA	TCCCCTTCTCTCTCCG:TCCCCTTCTCTCTCCG	ATTAAA:ATTAAA	TAAGAAGT:TAAGAAGT	G:G	A:A	A:G	A:G	A:A	G:G	A:A	G:G
ORUS 4534F	TAA:TAA	ACTCCCCCA:ACTCCCCCA	ACTCCCCCA:ACTCCCCCA	TGCTAAAT:TGCTAAAT	TGCTAAATTGAAAGGCTAATTACCATACGTGGTGGAAGATTGTAATCTCCAACAAA:TGCTAAATTGAAAGGCTAATTACCATACGTGGTGGAAGATTGTAATCTCCAACAAA	TTTTTAACCAAG:TCTTCAAAGAAG	TC:CT	TT:CT	TAAA:TACT	ACCTCCG:GCCTTCA	ACCTCCT:GCCTTCA	CAAC:CAAC	CGAG:CGAG	CGAC:CGAC	CAAAAAGAGT:CAAAAAGAGT	CAAAGAGT:CAAAAGAGT	CGAAAGAGT:CGAAAGAGT	AA:CG	AG:CG	GTTAC:GTTAC	ATTGA:ATTGA	GGA:AGA	GATATATATC:GGTATATATC	AC:AC	GCA:GAA	GCG:GAA	ATAAAATAG:ATGAAATAG	CA:TG	CG:TG	CAT:GAA	CCT:GAA	GGA:GGAAATGGAAATAGA	CAACT:CAACT	TTTTTAACC:TCTTCAAAG	GC:GC	TAAAAGAAGGT:TAAAAAGAAGGT	ATTATAA:ATCTTATAA	AA	TCCCCTTCTCTCTCTG:TCCCCTTCTCTCTCTG	ATTAAA:ATTAAA	TAAGAAGT:TAAGAAGT	G:G	A:A	A:G	A:G	A:A	G:G	A:A	G:G
ORUS 4534G	TAA:TAA	ACTCCCCCA:ACTCCCCCA	ACTCCCCCA:ACTCCCCCA	TGCTAAAT:TGCTAAAT	TGCTAAATTGAAAGGCTAATTACCATACGTGGTGGAAGATTGTAATCTCCAACAAA:TGCTAAATTGAAAGGCTAATTACCATACGTGGTGGAAGATTGTAATCTCCAACAAA	TTTTTAACCAAG:TCTTCAAAGAAG	TC:CT	TT:CT	TAAA:TACT	ACCTCCG:GCCTTCA	ACCTCCT:GCCTTCA	CAAC:GGAG	CGAG:GGAG	CGAC:GGAG	CAAAAAGAGT:CAAAAAGAGT	CAAAGAGT:CAAAAGAGT	CGAAAGAGT:CGAAAGAGT	AA:CG	AG:CG	GTTAC:GTTAC	ATTGA:ATTGA	NA	GATATATATC:GGTATATATC	AC:AC	GCA:GAA	GCG:GAA	ATAAAATAG:ATGAAATAG	CA:TG	CG:TG	CAT:GAA	CCT:GAA	GGA:GGAAATGGAAATAGA	CAACT:CAACT	TTTTTAACC:TCTTCAAAG	GC:GC	TAAAAGAAGGT:TAAAAAGAAGGT	ATTATAA:ATCTTATAA	AA	TCCCCTTCTCTCTCCG:TCCCCTTCTCTCTCCG	ATTAAA:ATTAAA	TAAGAAGT:TAAGAAGT	G:G	A:A	A:G	A:G	A:A	G:G	A:A	G:G
ORUS 4534J	TAA:TAA	ACTCCCCCA:ACTCCCCCA	ACTCCCCCA:ACTCCCCCA	TGCTAAAT:TGCTAAAT	TGCTAAATTGAAAGGCTAATTACCATACGTGGTGGAAGATTGTAATCTCCAACAAA:TGCTAAATTGAAAGGCTAATTACCATACGTGGTGGAAGATTGTAATCTCCAACAAA	TTTTTAACCAAG:TCTTCAAAGAAG	TC:CT	TT:CT	TAAA:TACT	ACCTCCG:GCCTTCA	ACCTCCT:GCCTTCA	CAAC:GGAG	CGAG:GGAG	CGAC:GGAG	CAAAAAGAGT:CAAAAAGAGT	CAAAGAGT:CAAAAGAGT	CGAAAGAGT:CGAAAGAGT	AA:CG	AG:CG	GTTAC:GTTAC	ATTGA:ATTGA	GGA:AGA	GATATATATC:GGTATATATC	AC:AC	GCA:GAA	GCG:GAA	ATAAAATAG:ATGAAATAG	CA:TG	CG:TG	CAT:GAA	CCT:GAA	GGA:GGAAATGGAAATAGA	CAACT:CAACT	TTTTTAACC:TCTTCAAAG	GC:GC	TAAAAGAAGGT:TAAAAAGAAGGT	ATTATAA:ATCTTATAA	AA	TCCCCTTCTCTCTCCG:TCCCCTTCTCTCTCCG	ATTAAA:ATTAAA	TAAGAAGT:TAAGAAGT	G:G	A:A	A:G	A:G	A:A	G:G	A:A	G:G
ORUS 4534N	TAA:TAA	ACTCCCCCA:ACTCCCCCA	ACTCCCCCA:ACTCCCCCA	TGCTAAAT:TGCTAAAT	TGCTAAATTGAAAGGCTAATTACCATACGTGGTGGAAGATTGTAATCTCCAACAAA:TGCTAAATTGAAAGGCTAATTACCATACGTGGTGGAAGATTGTAATCTCCAACAAA	TTTTTAACCAAG:TCTTCAAAGAAG	TC:CT	TT:CT	TAAA:TACT	ACCTCCG:GCCTTCA	ACCTCCT:GCCTTCA	CAAC:GGAG	CGAG:GGAG	CGAC:GGAG	CAAAAAGAGT:CAAAAAGAGT	CAAAGAGT:CAAAAGAGT	CGAAAGAGT:CGAAAGAGT	AA:CG	CG:CG	GTTAC:GTTAC	ATTGA:ATTGA	GGA:AGA	GATATATATC:GGTATATATC	AC:AC	GCA:GAA	GCG:GAA	ATAAAATAG:ATGAAATAG	CA:TG	CG:TG	CAT:GAA	CCT:GAA	GGA:GGAAATGGAAATAGA	CAACT:CAACT	TTTTTAACC:TCTTCAAAG	GC:GCTTTGCC	TAAAAGAAGGT:TAAAAGAAGGT	ATTATAA:ATCTTATAA	AA	TCCCCTTCTCTCTCCG:TCCCCTTCTCTCTCCG	ATTAAA:ATTAAA	TAAGAAGT:TAAGAAGT	G:G	A:A	A:G	A:G	A:A	G:G	A:A	G:G
ORUS 4534Q	TAA:TAA	ACTCCCCCA:ACTCCCCCA	ACTCCCCCA:ACTCCCCCA	NA	TGCTAAATTGAAAGGCTAATTACCATACGTGGTGGAAGATTGTAATCTCCAACAAA:TGCTAAATTGAAAGGCTAATTACCATACGTGGTGGAAGATTGTAATCTCCAACAAA	TTTTTAACCAAG:TCTTCAAAGAAG	TC:CT	TT:CT	TAAA:TACT	ACCTCCG:GCCTTCA	ACCTCCT:GCCTTCA	CAAC:GGAG	CGAG:GGAG	CGAC:GGAG	CAAAAAGAGT:CAAAAAGAGT	CAAAGAGT:CAAAAGAGT	NA	AA:CG	AG:CG	GTTAC:GTTAC	ATTGA:ATTGA	GGA:AGA	GATATATATC:GGTATATATC	AC:AC	GCA:GAA	GCG:GAA	NA	CA:TG	CG:TG	CAT:GAA	CCT:GAA	GGA:GGAAATGGAAATAGA	CAACT:CAACT	TTTTTAACC:TCTTCAAAG	GC:GC	NA	ATTATAA:ATCTTATAA	AA	TCCCCTTCTCTCTCTG:TCCCCTTCTCTCTCTG	ATTAAA:ATTAAA	TAAGAAGT:TAAGAAGT	G:G	A:A	NA	A:G	A:A	G:G	A:A	G:G
ORUS 4534R	TAA:TAA	ACTCCCCCA:ACTCCCCCA	ACTCCCCCA:ACTCCCCCA	TGCTAAAT:TGCTAAAT	TGCTAAATTGAAAGGCTAATTACCATACGTGGTGGAAGATTGTAATCTCCAACAAA:TGCTAAATTGAAAGGCTAATTACCATACGTGGTGGAAGATTGTAATCTCCAACAAA	TTTTTAACCAAG:TCTTCAAAGAAG	TC:CT	TT:CT	TACT:TACT	ACCTCCG:GCCTTCA	ACCTCCT:GCCTTCA	CAAC:GGAG	CGAG:GGAG	CGAC:GGAG	CAAAAAGAGT:CAAAAAGAGT	CAAAGAGT:CAAAAGAGT	CGAAAGAGT:CGAAAGAGT	CG:CG	CG:CG	GTTAC:GTTAC	ATTGA:ATTGA	GGA:AGA	GATATATATC:GGTATATATC	AC:AC	GCA:GAA	GCG:GAA	ATAAAATAG:ATGAAATAG	CA:TG	NA	CAT:GAA	CCT:GAA	GGA:GGAAATGGAAATAGA	CAACT:CAACT	TTTTTAACC:TCTTCAAAG	GC:GCTTTGCC	TAAAAGAAGGT:TAAAAAGAAGGT	ATTATAA:ATCTTATAA	AA	TCCCCTTCTCTCTCCG:TCCCCTTCTCTCTCCG	ATTAAA:ATTAAA	TAAGAAGT:TAAGAAGT	G:G	A:A	A:G	A:G	A:A	G:G	A:A	G:G
ORUS 4534V	TAA:TAA	ACTCCCCCA:ACTCCCCCA	ACTCCCCCA:ACTCCCCCA	TGCTAAAT:TGCTAAAT	TGCTAAATTGAAAGGCTAATTACCATACGTGGTGGAAGATTGTAATCTCCAACAAA:TGCTAAATTGAAAGGCTAATTACCATACGTGGTGGAAGATTGTAATCTCCAACAAA	TTTTTAACCAAG:TCTTCAAAGAAG	TC:CT	TT:CT	TAAA:TACT	ACCTCCG:GCCTTCA	NA	CAAC:GGAG	CGAG:GGAG	CGAC:GGAG	CAAAAAGAGT:CAAAAAGAGT	NA	CGAAAGAGT:CGAAAGAGT	AA:CG	AG:CG	GTTAC:GTTAC	ATTGA:ATTGA	GGA:AGA	GATATATATC:GGTATATATC	AC:AC	GCA:GAA	GCG:GAA	ATAAAATAG:ATGAAATAG	CA:TG	CG:TG	CAT:GAA	CCT:GAA	GGA:GGAAATGGAAATAGA	CAACT:CAACT	TTTTTAACC:TCTTCAAAG	GC:GCTTTGCC	TAAAAGAAGGT:TAAAAAGAAGGT	ATTATAA:ATCTTATAA	AA	TCCCCTTCTCTCTCCG:TCCCCTTCTCTCTCCG	ATTAAA:ATTAAA	TAAGAAGT:TAAGAAGT	G:G	A:A	A:G	A:G	A:A	G:G	A:A	G:G
ORUS 4534W	TAA:TAA	ACTCCCCCA:ACTCCCCCA	ACTCCCCCA:ACTCCCCCA	TGCTAAAT:TGCTAAAT	TGCTAAATTGAAAGGCTAATTACCATACGTGGTGGAAGATTGTAATCTCCAACAAA:TGCTAAATTGAAAGGCTAATTACCATACGTGGTGGAAGATTGTAATCTCCAACAAA	TTTTTAACCAAG:TCTTCAAAGAAG	TC:CT	TT:CT	TACT:TACT	ACCTCCG:GCCTTCA	ACCTCCT:GCCTTCA	CAAC:GGAG	CGAG:GGAG	CGAC:GGAG	CAAAAAGAGT:CAAAAAGAGT	CAAAAGAGT:CAAAAGAGT	CGAAAGAGT:CGAAAGAGT	AA:CG	AG:CG	GTTAC:GTTAC	ATTGA:ATTGA	GGA:AGA	GATATATATC:GGTATATATC	AC:AC	GCA:GAA	GCG:GAA	ATAAAATAG:ATGAAATAG	CA:TG	CG:TG	CAT:GAA	CCT:GAA	GGA:GGAAATGGAAATAGA	CAACT:CAACT	TTTTTAACC:TCTTCAAAG	GC:GC	TAAAAGAAGGT:TAAAAGAAGGT	ATTATAA:ATCTTATAA	AA	TCCCCTTCTCTCTCCG:TCCCCTTCTCTCTCCG	ATTAAA:ATTAAA	TAAGAAGT:TAAGAAGT	G:G	A:A	A:G	A:G	A:A	G:G	A:A	G:G
ORUS 4540A	TAA:TAC	ACCCCCCA:ACTCCCCCA	ACCCCCCCA:ACTCCCCCA	TGCTAAAT:TGCTAAAT	TGCTAAATTGAAAGGCTAATTACCATACGTGGTGGAAGATTGTAATCTCCAACAAA:TGCTAAATTGAAAGGCTAATTACCATACGTGGTGGAAGATTGTAATCTCCAACAAA	TTTTTAACCAAG:TCTTCAAAGAAG	CT:CT	CT:CT	TACT:TACT	ACCTCCG:GCCTTCA	GCCTTCA:GCCTTCA	CAAC:CAAC	CGAG:CGAG	CGAC:CGAC	CAAAAAGAGT:CAAAAAGAGT	CAAAAGAGT:CAAAAGAGT	CGAAAGAGT:CGAAAGAGT	AA:CG	AG:AG	GTTAC:GTTAC	ATTGA:ATGA	GGA:GGA	GATATATATC:GGTATATATC	AC:GT	GAA:GAA	GAA:GAA	ATAAAATAG:ATAAAATAG	CA:CA	CG:CG	CAT:CAT	CCT:CCT	GGA:GGA	CAACT:CAACT	TTTTTAACC:TCTTCAAAG	GC:GCTTTGCC	TAAAAGAAGGT:TAAAAAGAAGGT	ATCTTATAA:ATCTTATAA	AA	TCCCCTTCTCTCTCCG:TCCCCTTCTCTCTCCG	ATTAAA:ATTAAA	TAAGAAGT:TAAGAAGT	G:G	A:A	NA	G:G	A:A	G:G	A:A	G:G
ORUS 4540D	TAA:TAC	ACCCCCCA:ACTCCCCCA	ACCCCCCCA:ACTCCCCCA	TGCTAAAT:TGCTAAAT	TGCTAAATTGAAAGGCTAATTACCATACGTGGTGGAAGATTGTAATCTCCAACAAA:TGCTAAATTGAAAGGCTAATTACCATACGTGGTGGAAGATTGTAATCTCCAACAAA	TTTTTAACCAAG:TCTTCAAAGAAG	NA	CT:CT	TACT:TACT	ACCTCCG:ACCTCCG	NA	CAAC:CAAC	CGAG:CGAG	CGAC:CGAC	CAAAAAGAGT:CAAAAAGAGT	CAAAAGAGT:CAAAAGAGT	CGAAAGAGT:CGAAAGAGT	AA:CG	AG:AG	GTTAC:GTTAC	ATTGA:ATGA	GGA:GGA	GATATATATC:GATATATATC	AC:AC	GAA:GAA	GAA:GAA	ATAAAATAG:ATAAAATAG	CA:CA	CG:CG	CAT:CAT	CCT:CCT	GGA:GGA	CAACT:CAACT	TTTTTAACC:TCTTCAAAG	GC:GCTTTGCC	TAAAAGAAGGT:TAAAAGAAGGT	ATCTTATAA:ATCTTATAA	AA	TCCCCTTCTCTCTCCG:TCCCCTTCTCTCTCCG	ATTAAA:ATTAAA	TAAGAAGT:TAAGAAGT	G:G	A:A	A:A	A:G	A:A	G:G	A:A	G:G
ORUS 4540F	TAA:TAC	ACCCCCCA:ACTCCCCCA	ACCCCCCCA:ACTCCCCCA	TGCTAAAT:TGCTAAAT	TGCTAAATTGAAAGGCTAATTACCATACGTGGTGGAAGATTGTAATCTCCAACAAA:TGCTAAATTGAAAGGCTAATTACCATACGTGGTGGAAGATTGTAATCTCCAACAAA	TTTTTAACCAAG:TCTTCAAAGAAG	CT:CT	CT:CT	TACT:TACT	ACCTCCG:GCCTTCA	ACCTCCT:GCCTTCA	CAAC:CAAC	CGAG:CGAG	CGAC:CGAC	CAAAAAGAGT:CAAAAAGAGT	CAAAAGAGT:CAAAAGAGT	NA	AA:AA	AG:AG	GTTAC:GTTAC	ATTGA:ATGA	GGA:GGA	GATATATATC:GGTATATATC	AC:GT	GAA:GAA	GAA:GAA	ATAAAATAG:ATAAAATAG	CA:CA	CG:CG	CAT:CAT	CCT:CCT	GGA:GGA	CAACT:CAAACT	TTTTTAACC:TCTTCAAAG	GC:GC	TAAAAGAAGGT:TAAAAAGAAGGT	ATCTTATAA:ATCTTATAA	AA	TCCCCTTCTCTCTCCG:TCCCCTTCTCTCTCCG	ATTAAA:ATTAAA	TAAGAAGT:TAAGAAGT	G:G	A:A	A:A	G:G	A:A	G:G	A:A	G:G
ORUS 4540G	TAA:TAC	ACCCCCCA:ACTCCCCCA	ACCCCCCCA:ACTCCCCCA	TGCTAAAT:TGCTAAAT	TGCTAAATTGAAAGGCTAATTACCATACGTGGTGGAAGATTGTAATCTCCAACAAA:TGCTAAATTGAAAGGCTAATTACCATACGTGGTGGAAGATTGTAATCTCCAACAAA	TTTTTAACCAAG:TCTTCAAAGAAG	CT:CT	CT:CT	TACT:TACT	ACCTCCG:ACCTCCG	GCCTTCA:GCCTTCA	CAAC:CAAC	CGAG:CGAG	CGAC:CGAC	CAAAAAGAGT:CAAAAAGAGT	CAAAAGAGT:CAAAAGAGT	NA	AA:CG	AG:AG	GTTAC:GTTAC	ATTGA:ATGA	GGA:GGA	GATATATATC:GGTATATATC	AC:GT	GAA:GAA	GAA:GAA	ATAAAATAG:ATAAAATAG	CA:CA	CG:CG	CAT:CAT	CCT:CCT	GGA:GGA	CAACT:CAACT	TTTTTAACC:TCTTCAAAG	GC:GC	TAAAAGAAGGT:TAAAAAGAAGGT	ATCTTATAA:ATCTTATAA	AA	TCCCCTTCTCTCTCCG:TCCCCTTCTCTCTCCG	ATTAAA:ATTAAA	TAAGAAGT:TAAGAAGT	G:G	A:A	A:A	A:G	A:A	G:G	A:A	G:G
ORUS 4540H	TAA:TAC	ACCCCCCA:ACTCCCCCA	ACCCCCCCA:ACTCCCCCA	TGCTAAAT:TGCTAAAT	TGCTAAATTGAAAGGCTAATTACCATACGTGGTGGAAGATTGTAATCTCCAACAAA:TGCTAAATTGAAAGGCTAATTACCATACGTGGTGGAAGATTGTAATCTCCAACAAA	TTTTTAACCAAG:TCTTCAAAGAAG	CT:CT	CT:CT	TACT:TACT	ACCTCCG:GCCTTCA	ACCTCCT:GCCTTCA	CAAC:CAAC	CGAG:CGAG	CGAC:CGAC	CAAAAAGAGT:CAAAAAGAGT	CAAAAGAGT:CAAAAGAGT	CGAAAGAGT:CGAAAGAGT	AA:CG	AG:AG	GTTAC:GTTAC	ATTGA:ATGA	GGA:GGA	GATATATATC:GATATATATC	AC:AC	GAA:GAA	GAA:GAA	ATAAAATAG:ATAAAATAG	CA:CA	CG:CG	CAT:CAT	CCT:CCT	GGA:GGA	CAACT:CAACT	TTTTTAACC:TCTTCAAAG	GC:GC	TAAAAGAAGGT:TAAAAAGAAGGT	ATCTTATAA:ATCTTATAA	AA	TCCCCTTCTCTCTCCG:TCCCCTTCTCTCTCCG	ATTAAA:ATTAAA	TAAGAAGT:TAAGAAGT	G:G	A:A	A:A	A:G	A:A	G:G	A:A	G:G
ORUS 4540I	TAA:TAC	ACCCCCCA:ACTCCCCCA	ACCCCCCCA:ACTCCCCCA	NA	TGCTAAATTGAAAGGCTAATTACCATACGTGGTGGAAGATTGTAATCTCCAACAAA:TTTAG	TTTTTAACCAAG:TCTTCAAAGAAG	CT:CT	CT:CT	TACT:TACT	ACCTCCG:ACCTCCG	ACCTCCT:GCCTTCA	CAAC:CAAC	CGAG:CGAG	CGAC:CGAC	CAAAAAGAGT:CAAAAAGAGT	CAAAAGAGT:CAAAAGAGT	CGAAAGAGT:CGAAAGAGT	AA:CG	AG:AG	GTTAC:GTTAC	ATTGA:ATGA	GGA:GGA	GATATATATC:GGTATATATC	NA	GAA:GAA	GAA:GAA	ATAAAATAG:ATAAAATAG	CA:CA	CG:CG	CAT:CAT	CCT:CCT	GGA:GGA	CAACT:CAACT	TTTTTAACC:TCTTCAAAG	GC:GC	TAAAAGAAGGT:TAAAAGAAGGT	ATCTTATAA:ATCTTATAA	AA	TCCCCTTCTCTCTCCG:TCCCCTTCTCTCTCCG	NA	TAAGAAGT:TAAGAAGT	G:G	A:A	A:A	G:G	T:A	NA	NA	G:G
ORUS 4540K	TAA:TAC	ACCCCCCA:ACTCCCCCA	ACCCCCCCA:ACTCCCCCA	TGCTAAAT:TGCTAAAT	TGCTAAATTGAAAGGCTAATTACCATACGTGGTGGAAGATTGTAATCTCCAACAAA:TGCTAAATTGAAAGGCTAATTACCATACGTGGTGGAAGATTGTAATCTCCAACAAA	TTTTTAACCAAG:TTTTTAACCAAG	CT:CT	CT:CT	TACT:TACT	ACCTCCG:ACCTCCG	NA	CAAC:CAAC	CGAG:CGAG	CGAC:CGAC	CAAAAAGAGT:CAAAAAGAGT	NA	CGAAAGAGT:CGAAAGAGT	AA:CG	AG:AG	GTTAC:GTTAC	ATTGA:ATGA	GGA:GGA	GATATATATC:GATATATATC	AC:AC	GAA:GAA	GAA:GAA	ATAAAATAG:ATAAAATAG	CA:CA	CG:CG	CAT:CAT	CCT:CCT	GGA:GGA	CAACT:CAACT	TTTTTAACC:TTTTTAACC	GCTTTGCC:GCTTTGCC	TAAAAGAAGGT:TAAAAGAAGGT	ATCTTATAA:ATCTTATAA	AA	TCCCCTTCTCTCTCCG:TCCCCTTCTCTCTCCG	ATTAAA:ATTAAA	TAAGAAGT:TAAGAAGT	G:G	A:A	A:A	G:G	A:A	G:G	A:A	G:G
ORUS 4540L	TAA:TAC	ACCCCCCA:ACTCCCCCA	ACCCCCCCA:ACTCCCCCA	TGCTAAAT:TGCTAAAT	TGCTAAATTGAAAGGCTAATTACCATACGTGGTGGAAGATTGTAATCTCCAACAAA:TGCTAAATTGAAAGGCTAATTACCATACGTGGTGGAAGATTGTAATCTCCAACAAA	TTTTTAACCAAG:TCTTCAAAGAAG	CT:CT	CT:CT	TACT:TACT	ACCTCCG:GCCTTCA	ACCTCCT:GCCTTCA	CAAC:CAAC	CGAG:CGAG	CGAC:CGAC	CAAAAAGAGT:CAAAAAGAGT	CAAAAGAGT:CAAAAGAGT	NA	AA:CG	AG:AG	GTTAC:GTTAC	ATTGA:ATGA	GGA:GGA	GATATATATC:GGTATATATC	AC:GT	GAA:GAA	GAA:GAA	ATAAAATAG:ATAAAATAG	CA:CA	CG:CG	CAT:CAT	CCT:CCT	GGA:GGA	CAACT:CAACT	TTTTTAACC:TCTTCAAAG	GC:GC	TAAAAGAAGGT:TAAAAAGAAGGT	ATCTTATAA:ATCTTATAA	AA	TCCCCTTCTCTCTCCG:TCCCCTTCTCTCTCCG	ATTAAA:ATTAAA	TAAGAAGT:TAAGAAGT	G:G	A:A	A:A	A:G	A:A	G:G	A:A	G:G
ORUS 4540M	NA	ACCCCCCA:ACTCCCCCA	ACCCCCCCA:ACTCCCCCA	TGCTAAAT:TGCTAAAT	TGCTAAATTGAAAGGCTAATTACCATACGTGGTGGAAGATTGTAATCTCCAACAAA:TGCTAAATTGAAAGGCTAATTACCATACGTGGTGGAAGATTGTAATCTCCAACAAA	TTTTTAACCAAG:TCTTCAAAGAAG	CT:CT	CT:CT	TACT:TACT	ACCTCCG:GCCTTCA	ACCTCCT:GCCTTCA	CAAC:CAAC	CGAG:CGAG	CGAC:CGAC	CAAAAAGAGT:CAAAAAGAGT	CAAAAGAGT:CAAAAGAGT	CGAAAGAGT:CGAAAGAGT	AA:CG	AG:AG	GTTAC:GTTAC	ATTGA:ATGA	GGA:GGA	GATATATATC:GATATATATC	AC:AC	GAA:GAA	GAA:GAA	ATAAAATAG:ATAAAATAG	CA:CA	CG:CG	CAT:CAT	CCT:CCT	GGA:GGA	CAACT:CAACT	TTTTTAACC:TCTTCAAAG	GC:GC	TAAAAGAAGGT:TAAAAAGAAGGT	ATCTTATAA:ATCTTATAA	AA	TCCCCTTCTCTCTCCG:TCCCCTTCTCTCTCCG	ATTAAA:ATTAAA	TAAGAAGT:TAAGAAGT	G:G	A:A	NA	A:G	A:A	G:G	A:A	G:G
ORUS 4540P	TAA:TAC	ACCCCCCA:ACTCCCCCA	ACCCCCCCA:ACTCCCCCA	TGCTAAAT:TGCTAAAT	TGCTAAATTGAAAGGCTAATTACCATACGTGGTGGAAGATTGTAATCTCCAACAAA:TGCTAAATTGAAAGGCTAATTACCATACGTGGTGGAAGATTGTAATCTCCAACAAA	TTTTTAACCAAG:TCTTCAAAGAAG	CT:CT	CT:CT	TACT:TACT	ACCTCCG:ACCTCCG	NA	CAAC:CAAC	CGAG:CGAG	CGAC:CGAC	CAAAAAGAGT:CAAAAAGAGT	CAAAAGAGT:CAAAAGAGT	CGAAAGAGT:CGAAAGAGT	AA:CG	AG:AG	GTTAC:GTTAC	ATTGA:ATGA	GGA:GGA	GATATATATC:GGTATATATC	AC:GT	GAA:GAA	GAA:GAA	ATAAAATAG:ATAAAATAG	CA:CA	CG:CG	CAT:CAT	CCT:CCT	GGA:GGA	CAACT:CAACT	TTTTTAACC:TCTTCAAAG	GC:GCTTTGCC	TAAAAGAAGGT:TAAAAAGAAGGT	ATCTTATAA:ATCTTATAA	AA	TCCCCTTCTCTCTCCG:TCCCCTTCTCTCTCCG	ATTAAA:ATTAAA	TAAGAAGT:TAAGAAGT	G:G	A:A	A:A	G:G	A:A	G:G	A:A	G:G
ORUS 4540R	TAA:TAC	ACCCCCCA:ACTCCCCCA	ACCCCCCCA:ACTCCCCCA	TGCTAAAT:TGCTAAAT	TGCTAAATTGAAAGGCTAATTACCATACGTGGTGGAAGATTGTAATCTCCAACAAA:TGCTAAATTGAAAGGCTAATTACCATACGTGGTGGAAGATTGTAATCTCCAACAAA	TTTTTAACCAAG:TCTTCAAAGAAG	CT:CT	CT:CT	TACT:TACT	ACCTCCG:GCCTTCA	GCCTTCA:GCCTTCA	CAAC:CAAC	CGAG:CGAG	CGAC:CGAC	CAAAAAGAGT:CAAAAAGAGT	CAAAAGAGT:CAAAAGAGT	CGAAAGAGT:CGAAAGAGT	AA:CG	AG:AG	GTTAC:GTTAC	ATTGA:ATGA	GGA:GGA	GATATATATC:GGTATATATC	AC:GT	GAA:GAA	GAA:GAA	ATAAAATAG:ATAAAATAG	CA:CA	CG:CG	CAT:CAT	CCT:CCT	GGA:GGA	CAACT:CAAACT	TTTTTAACC:TCTTCAAAG	GC:GC	TAAAAGAAGGT:TAAAAGAAGGT	ATCTTATAA:ATCTTATAA	AA	TCCCCTTCTCTCTCCG:TCCCCTTCTCTCTCCG	ATTAAA:ATTAAA	TAAGAAGT:TAAGAAGT	G:G	A:A	A:A	A:G	A:A	G:G	A:A	G:G
ORUS 4540W	TAA:TAC	ACCCCCCA:ACTCCCCCA	ACCCCCCCA:ACTCCCCCA	TGCTAAAT:TGCTAAAT	TGCTAAATTGAAAGGCTAATTACCATACGTGGTGGAAGATTGTAATCTCCAACAAA:TGCTAAATTGAAAGGCTAATTACCATACGTGGTGGAAGATTGTAATCTCCAACAAA	TTTTTAACCAAG:TCTTCAAAGAAG	CT:CT	CT:CT	TACT:TACT	ACCTCCG:ACCTCCG	NA	CAAC:CAAC	CGAG:CGAG	CGAC:CGAC	CAAAAAGAGT:CAAAAAGAGT	CAAAAGAGT:CAAAAGAGT	CGAAAGAGT:CGAAAGAGT	AA:CG	AG:AG	GTTAC:GTTAC	ATTGA:ATGA	GGA:GGA	GATATATATC:GGTATATATC	AC:GT	GAA:GAA	GAA:GAA	ATAAAATAG:ATAAAATAG	CA:CA	CG:CG	CAT:CAT	CCT:CCT	GGA:GGA	CAACT:CAACT	TTTTTAACC:TCTTCAAAG	GC:GC	TAAAAGAAGGT:TAAAAAGAAGGT	ATCTTATAA:ATCTTATAA	AA	TCCCCTTCTCTCTCCG:TCCCCTTCTCTCTCCG	ATTAAA:ATTAAA	TAAGAAGT:TAAGAAGT	G:G	A:A	A:A	G:G	A:A	G:G	A:A	G:G
ORUS 4647C	TAA:TAA	ACTCCCCCA:ACTCCCCCA	ACTCCCCCA:ACTCCCCCA	TGCTAAAT:TGCTAAAT	TGCTAAATTGAAAGGCTAATTACCATACGTGGTGGAAGATTGTAATCTCCAACAAA:TGCTAAATTGAAAGGCTAATTACCATACGTGGTGGAAGATTGTAATCTCCAACAAA	TTTTTAACCAAG:TCTTCAAAGAAG	TC:CT	TT:CT	TACT:TACT	ACCTCCG:GCCTTCA	NA	CAAC:GGAG	CGAG:GGAG	CGAC:GGAG	CAAAAAGAGT:CAAAAAGAGT	CAAAAGAGT:CAAAAGAGT	NA	AA:CG	AG:AG	GTTAC:GTAAC	ATTGA:ATTGA	GGA:AGA	GATATATATC:GGTATATATC	AC:AC	GCA:GAA	GCG:GAA	ATAAAATAG:ATGAAATAG	CA:TG	CG:TG	CAT:GAA	CCT:GAA	GGA:GGAAATGGAAATAGA	CAACT:CAACT	TTTTTAACC:TCTTCAAAG	GC:GC	TAAAAGAAGGT:TAAAAAGAAGGT	ATTATAA:ATCTTATAA	AA	TCCCCTTCTCTCTCTG:TCCCCTTCTCTCTCTG	ATTAAA:ATTAAA	TAAGAAGT:TAAGAAGT	G:T	T:T	A:G	G:G	A:A	G:G	A:A	G:C
ORUS 4647D	TAA:TAA	ACTCCCCCA:ACTCCCCCA	ACTCCCCCA:ACTCCCCCA	TGCTAAAT:TGCTAAAT	TGCTAAATTGAAAGGCTAATTACCATACGTGGTGGAAGATTGTAATCTCCAACAAA:TGCTAAATTGAAAGGCTAATTACCATACGTGGTGGAAGATTGTAATCTCCAACAAA	TTTTTAACCAAG:TCTTCAAAGAAG	TC:CT	TT:CT	TACT:TACT	ACCTCCG:GCCTTCA	ACCTCCT:GCCTTCA	CAAC:GGAG	CGAG:GGAG	CGAC:GGAG	CAAAAAGAGT:CAAAAAGAGT	CAAAAGAGT:CAAAAGAGT	CGAAAGAGT:CGAAAGAGT	AA:CG	AG:AG	GTTAC:GTAAC	ATTGA:ATTGA	GGA:AGA	GATATATATC:GATATATATC	AC:AC	GCA:GAA	GCG:GAA	ATAAAATAG:ATGAAATAG	CA:TG	CG:TG	CAT:GAA	CCT:GAA	GGA:GGAAATGGAAATAGA	CAACT:CAACT	TTTTTAACC:TCTTCAAAG	GC:GC	TAAAAGAAGGT:TAAAAAGAAGGT	ATTATAA:ATCTTATAA	AA	TCCCCTTCTCTCTCTG:TCCCCTTCTCTCTCTG	ATTAAA:ATTAAA	TAAGAAGT:TAAGAAGT	G:T	T:T	A:G	G:G	A:A	G:G	A:A	G:G
ORUS 4647F	TAA:TAA	ACTCCCCCA:ACTCCCCCA	ACTCCCCCA:ACTCCCCCA	TGCTAAAT:TGCTAAAT	TGCTAAATTGAAAGGCTAATTACCATACGTGGTGGAAGATTGTAATCTCCAACAAA:TGCTAAATTGAAAGGCTAATTACCATACGTGGTGGAAGATTGTAATCTCCAACAAA	TTTTTAACCAAG:TCTTCAAAGAAG	TC:CT	TT:CT	TACT:TACT	GCCTTCA:GCCTTCA	ACCTCCT:GCCTTCA	CAAC:GGAG	CGAG:GGAG	CGAC:GGAG	CAAAAAGAGT:CAAAAAGAGT	CAAAAGAGT:CAAAAGAGT	CGAAAGAGT:CGAAAGAGT	AA:CG	AG:AG	GTTAC:GTAAC	ATTGA:ATTGA	GGA:AGA	GATATATATC:GGTATATATC	AC:AC	GCA:GAA	GCG:GAA	ATAAAATAG:ATGAAATAG	CA:TG	CG:TG	CAT:GAA	CCT:GAA	GGA:GGAAATGGAAATAGA	CAACT:CAACT	TTTTTAACC:TCTTCAAAG	GC:GC	TAAAAGAAGGT:TAAAAAGAAGGT	ATTATAA:ATCTTATAA	AA	TCCCCTTCTCTCTCTG:TCCCCTTCTCTCTCTG	ATTAAA:ATTAAA	TAAGAAGT:TAAGAAGT	G:T	T:T	A:G	A:G	A:A	G:G	A:A	G:C
ORUS 4647G	TAA:TAA	ACTCCCCCA:ACTCCCCCA	ACTCCCCCA:ACTCCCCCA	TGCTAAAT:TGCTAAAT	TGCTAAATTGAAAGGCTAATTACCATACGTGGTGGAAGATTGTAATCTCCAACAAA:TGCTAAATTGAAAGGCTAATTACCATACGTGGTGGAAGATTGTAATCTCCAACAAA	TTTTTAACCAAG:TCTTCAAAGAAG	TC:CT	TT:CT	TACT:TACT	ACCTCCG:GCCTTCA	GCCTTCA:GCCTTCA	CAAC:GGAG	CGAG:GGAG	CGAC:GGAG	CAAAAAGAGT:CAAAAAGAGT	CAAAAGAGT:CAAAAGAGT	CGAAAGAGT:CGAAAGAGT	CG:CG	AG:CG	GTTAC:GTAAC	ATTGA:ATTGA	GGA:AGA	GATATATATC:GATATATATC	AC:AC	GCA:GAA	GCG:GAA	ATAAAATAG:ATGAAATAG	CA:TG	CG:TG	CAT:GAA	CCT:GAA	GGA:GGAAATGGAAATAGA	CAACT:CAACT	TTTTTAACC:TCTTCAAAG	GC:GC	TAAAAGAAGGT:TAAAAAGAAGGT	ATTATAA:ATCTTATAA	AA	TCCCCTTCTCTCTCTG:TCCCCTTCTCTCTCTG	ATTAAA:ATTAAA	TAAGAAGT:TAAGAAGT	G:T	T:T	A:G	G:G	A:A	G:G	A:A	G:C
ORUS 4647H	TAA:TAA	ACTCCCCCA:ACTCCCCCA	ACTCCCCCA:ACTCCCCCA	TGCTAAAT:TGCTAAAT	TGCTAAATTGAAAGGCTAATTACCATACGTGGTGGAAGATTGTAATCTCCAACAAA:TGCTAAATTGAAAGGCTAATTACCATACGTGGTGGAAGATTGTAATCTCCAACAAA	TTTTTAACCAAG:TCTTCAAAGAAG	TC:CT	TT:CT	TACT:TACT	ACCTCCG:GCCTTCA	ACCTCCT:GCCTTCA	CAAC:GGAG	CGAG:GGAG	CGAC:GGAG	CAAAAAGAGT:CAAAAAGAGT	CAAAAGAGT:CAAAAGAGT	NA	AA:CG	AG:AG	GTTAC:GTAAC	ATTGA:ATTGA	GGA:AGA	GATATATATC:GGTATATATC	AC:AC	NA	GCG:GAA	ATAAAATAG:ATGAAATAG	CA:TG	CG:TG	CAT:GAA	CCT:GAA	GGA:GGAAATGGAAATAGA	CAACT:CAACT	TTTTTAACC:TCTTCAAAG	GC:GC	TAAAAGAAGGT:TAAAAAGAAGGT	ATTATAA:ATCTTATAA	AA	TCCCCTTCTCTCTCTG:TCCCCTTCTCTCTCTG	ATTAAA:ATTAAA	TAAGAAGT:TAAGAAGT	G:T	T:T	A:G	G:G	A:A	G:G	A:A	G:G
ORUS 4647I	TAA:TAA	ACTCCCCCA:ACTCCCCCA	ACTCCCCCA:ACTCCCCCA	TGCTAAAT:TGCTAAAT	TGCTAAATTGAAAGGCTAATTACCATACGTGGTGGAAGATTGTAATCTCCAACAAA:TGCTAAATTGAAAGGCTAATTACCATACGTGGTGGAAGATTGTAATCTCCAACAAA	TTTTTAACCAAG:TCTTCAAAGAAG	TC:CT	TT:CT	TACT:TACT	ACCTCCG:GCCTTCA	ACCTCCT:GCCTTCA	CAAC:GGAG	CGAG:GGAG	CGAC:GGAG	NA	CAAAAGAGT:CAAAAGAGT	CGAAAGAGT:CGAAAGAGT	AA:CG	AG:AG	GTTAC:GTAAC	ATTGA:ATTGA	GGA:AGA	GATATATATC:GGTATATATC	AC:AC	GCA:GAA	GCG:GAA	ATAAAATAG:ATGAAATAG	CA:TG	CG:TG	CAT:GAA	CCT:GAA	GGA:GGAAATGGAAATAGA	CAACT:CAACT	TTTTTAACC:TCTTCAAAG	GC:GCTTTGCC	TAAAAGAAGGT:TAAAAAGAAGGT	ATTATAA:ATCTTATAA	AA	TCCCCTTCTCTCTCTG:TCCCCTTCTCTCTCTG	ATTAAA:ATTAAA	TAAGAAGT:TAAGAAGT	G:T	T:T	A:A	G:G	A:A	G:G	A:A	G:C
ORUS 4647K	TAA:TAA	ACTCCCCCA:ACTCCCCCA	ACTCCCCCA:ACTCCCCCA	TGCTAAAT:TGCTAAAT	TGCTAAATTGAAAGGCTAATTACCATACGTGGTGGAAGATTGTAATCTCCAACAAA:TGCTAAATTGAAAGGCTAATTACCATACGTGGTGGAAGATTGTAATCTCCAACAAA	TTTTTAACCAAG:TCTTCAAAGAAG	TC:CT	TT:CT	TACT:TACT	ACCTCCG:GCCTTCA	GCCTTCA:GCCTTCA	CAAC:GGAG	CGAG:GGAG	CGAC:GGAG	CAAAAAGAGT:CAAAAAGAGT	CAAAAGAGT:CAAAAGAGT	CGAAAGAGT:CGAAAGAGT	AA:CG	AG:CG	NA	ATTGA:ATTGA	GGA:AGA	GATATATATC:GATATATATC	AC:AC	GCA:GAA	GCG:GAA	ATAAAATAG:ATGAAATAG	CA:TG	CG:TG	CAT:GAA	CCT:GAA	GGA:GGAAATGGAAATAGA	CAACT:CAACT	TTTTTAACC:TCTTCAAAG	GC:GCTTTGCC	TAAAAGAAGGT:TAAAAAGAAGGT	ATTATAA:ATCTTATAA	AA	TCCCCTTCTCTCTCTG:TCCCCTTCTCTCTCTG	ATTAAA:ATTAAA	TAAGAAGT:TAAGAAGT	G:T	T:T	NA	A:G	A:A	G:G	A:A	NA
ORUS 4647L	TAA:TAA	ACTCCCCCA:ACTCCCCCA	ACTCCCCCA:ACTCCCCCA	TGCTAAAT:TGCTAAAT	TGCTAAATTGAAAGGCTAATTACCATACGTGGTGGAAGATTGTAATCTCCAACAAA:TGCTAAATTGAAAGGCTAATTACCATACGTGGTGGAAGATTGTAATCTCCAACAAA	TTTTTAACCAAG:TCTTCAAAGAAG	TC:CT	TT:CT	TACT:TACT	ACCTCCG:GCCTTCA	GCCTTCA:GCCTTCA	CAAC:GGAG	CGAG:GGAG	CGAC:GGAG	CAAAAAGAGT:CAAAAAGAGT	CAAAAGAGT:CAAAAGAGT	CGAAAGAGT:CGAAAGAGT	AA:CG	AG:AG	GTTAC:GTAAC	ATTGA:ATTGA	GGA:AGA	GATATATATC:GGTATATATC	AC:AC	GCA:GAA	GCG:GAA	ATAAAATAG:ATGAAATAG	CA:TG	CG:TG	CAT:GAA	CCT:GAA	GGA:GGAAATGGAAATAGA	CAACT:CAACT	TTTTTAACC:TCTTCAAAG	GC:GC	TAAAAGAAGGT:TAAAAAGAAGGT	ATTATAA:ATCTTATAA	AA	TCCCCTTCTCTCTCTG:TCCCCTTCTCTCTCTG	ATTAAA:ATTAAA	TAAGAAGT:TAAGAAGT	G:T	T:T	A:G	G:G	A:A	G:G	A:A	G:G
ORUS 4647M	TAA:TAA	ACTCCCCCA:ACTCCCCCA	ACTCCCCCA:ACTCCCCCA	TGCTAAAT:TGCTAAAT	TGCTAAATTGAAAGGCTAATTACCATACGTGGTGGAAGATTGTAATCTCCAACAAA:TGCTAAATTGAAAGGCTAATTACCATACGTGGTGGAAGATTGTAATCTCCAACAAA	TTTTTAACCAAG:TCTTCAAAGAAG	TC:CT	TT:CT	TACT:TACT	ACCTCCG:GCCTTCA	ACCTCCT:GCCTTCA	CAAC:GGAG	CGAG:GGAG	CGAC:GGAG	CAAAAAGAGT:CAAAAAGAGT	CAAAAGAGT:CAAAAGAGT	CGAAAGAGT:CGAAAGAGT	AA:CG	AG:CG	GTTAC:GTAAC	ATTGA:ATTGA	GGA:AGA	GATATATATC:GATATATATC	AC:AC	GCA:GAA	GCG:GAA	ATAAAATAG:ATGAAATAG	CA:TG	CG:TG	CAT:GAA	CCT:GAA	GGA:GGAAATGGAAATAGA	CAACT:CAACT	TTTTTAACC:TCTTCAAAG	GC:GC	TAAAAGAAGGT:TAAAAAGAAGGT	ATTATAA:ATCTTATAA	AA	TCCCCTTCTCTCTCTG:TCCCCTTCTCTCTCTG	ATTAAA:ATTAAA	TAAGAAGT:TAAGAAGT	G:T	T:T	A:G	G:G	A:A	G:G	A:A	G:C
ORUS 4647O	TAA:TAA	ACTCCCCCA:ACTCCCCCA	ACTCCCCCA:ACTCCCCCA	TGCTAAAT:TGCTAAAT	TGCTAAATTGAAAGGCTAATTACCATACGTGGTGGAAGATTGTAATCTCCAACAAA:TGCTAAATTGAAAGGCTAATTACCATACGTGGTGGAAGATTGTAATCTCCAACAAA	TTTTTAACCAAG:TCTTCAAAGAAG	TC:CT	TT:CT	TACT:TACT	ACCTCCG:GCCTTCA	ACCTCCT:GCCTTCA	CAAC:GGAG	CGAG:GGAG	CGAC:GGAG	CAAAAAGAGT:CAAAAAGAGT	CAAAAGAGT:CAAAAGAGT	CGAAAGAGT:CGAAAGAGT	AA:CG	AG:CG	GTTAC:GTTAC	ATTGA:ATTGA	GGA:AGA	GATATATATC:GGTATATATC	AC:AC	GCA:GAA	GCG:GAA	ATAAAATAG:ATGAAATAG	CA:TG	CG:TG	CAT:GAA	CCT:GAA	GGA:GGAAATGGAAATAGA	CAACT:CAACT	TTTTTAACC:TCTTCAAAG	GC:GCTTTGCC	TAAAAGAAGGT:TAAAAAGAAGGT	ATTATAA:ATCTTATAA	AA	TCCCCTTCTCTCTCTG:TCCCCTTCTCTCTCTG	ATTAAA:ATTAAA	TAAGAAGT:TAAGAAGT	G:T	T:T	A:G	A:G	A:A	G:G	A:A	G:C
ORUS 4647P	TAA:TAA	ACTCCCCCA:ACTCCCCCA	ACTCCCCCA:ACTCCCCCA	TGCTAAAT:TGCTAAAT	TGCTAAATTGAAAGGCTAATTACCATACGTGGTGGAAGATTGTAATCTCCAACAAA:TGCTAAATTGAAAGGCTAATTACCATACGTGGTGGAAGATTGTAATCTCCAACAAA	TTTTTAACCAAG:TCTTCAAAGAAG	TC:CT	TT:CT	TACT:TACT	ACCTCCG:GCCTTCA	ACCTCCT:GCCTTCA	CAAC:GGAG	CGAG:GGAG	CGAC:GGAG	CAAAAAGAGT:CAAAAAGAGT	CAAAAGAGT:CAAAAGAGT	CGAAAGAGT:CGAAAGAGT	AA:CG	AG:AG	GTTAC:GTAAC	ATTGA:ATTGA	GGA:GGA	GATATATATC:GATATATATC	AC:AC	GCA:GAA	GCG:GAA	ATAAAATAG:ATGAAATAG	CA:TG	CG:TG	CAT:GAA	CCT:GAA	GGA:GGA	CAACT:CAACT	TTTTTAACC:TCTTCAAAG	GC:GCTTTGCC	TAAAAGAAGGT:TAAAAAGAAGGT	ATTATAA:ATCTTATAA	AA	TCCCCTTCTCTCTCTG:TCCCCTTCTCTCTCTG	ATTAAA:ATTAAA	TAAGAAGT:TAAGAAGT	G:T	T:T	A:G	G:G	A:A	G:G	A:A	G:C
ORUS 4647R	TAA:TAA	ACTCCCCCA:ACTCCCCCA	ACTCCCCCA:ACTCCCCCA	NA	TGCTAAATTGAAAGGCTAATTACCATACGTGGTGGAAGATTGTAATCTCCAACAAA:TGCTAAATTGAAAGGCTAATTACCATACGTGGTGGAAGATTGTAATCTCCAACAAA	TTTTTAACCAAG:TCTTCAAAGAAG	TC:CT	TT:CT	TACT:TACT	ACCTCCG:GCCTTCA	ACCTCCT:GCCTTCA	CAAC:GGAG	CGAG:GGAG	CGAC:GGAG	CAAAAAGAGT:CAAAAAGAGT	CAAAAGAGT:CAAAAGAGT	CGAAAGAGT:CGAAAGAGT	AA:CG	AG:CG	NA	ATTGA:ATTGA	GGA:AGA	GATATATATC:GGTATATATC	AC:AC	GCA:GAA	GCG:GAA	ATAAAATAG:ATGAAATAG	CA:TG	CG:TG	CAT:GAA	CCT:GAA	GGA:GGAAATGGAAATAGA	CAACT:CAACT	TTTTTAACC:TCTTCAAAG	GC:GC	TAAAAGAAGGT:TAAAAAGAAGGT	NA	AA	TCCCCTTCTCTCTCTG:TCCCCTTCTCTCTCTG	ATTAAA:ATTAAA	TAAGAAGT:TAAGAAGT	G:T	T:T	A:G	G:G	A:A	G:G	A:A	G:C
ORUS 4647S	TAA:TAA	ACTCCCCCA:ACTCCCCCA	ACTCCCCCA:ACTCCCCCA	TGCTAAAT:TGCTAAAT	TGCTAAATTGAAAGGCTAATTACCATACGTGGTGGAAGATTGTAATCTCCAACAAA:TGCTAAATTGAAAGGCTAATTACCATACGTGGTGGAAGATTGTAATCTCCAACAAA	TTTTTAACCAAG:TCTTCAAAGAAG	TC:CT	TT:CT	TACT:TACT	ACCTCCG:GCCTTCA	GCCTTCA:GCCTTCA	CAAC:GGAG	CGAG:GGAG	CGAC:GGAG	CAAAAAGAGT:CAAAAAGAGT	CAAAAGAGT:CAAAAGAGT	CGAAAGAGT:CGAAAGAGT	AA:CG	AG:CG	GTTAC:GTAAC	ATTGA:ATTGA	GGA:AGA	GATATATATC:GGTATATATC	AC:AC	GCA:GAA	GCG:GAA	ATAAAATAG:ATGAAATAG	CA:TG	CG:TG	CAT:GAA	CCT:GAA	GGA:GGAAATGGAAATAGA	CAACT:CAACT	TTTTTAACC:TCTTCAAAG	GC:GC	TAAAAGAAGGT:TAAAAAGAAGGT	ATTATAA:ATCTTATAA	AA	TCCCCTTCTCTCTCTG:TCCCCTTCTCTCTCTG	NA	TAAGAAGT:TAAGAAGT	G:T	T:T	A:G	G:G	A:A	G:G	A:A	G:G
ORUS 4647T	TAA:TAA	ACTCCCCCA:ACTCCCCCA	ACTCCCCCA:ACTCCCCCA	TGCTAAAT:TGCTAAAT	TGCTAAATTGAAAGGCTAATTACCATACGTGGTGGAAGATTGTAATCTCCAACAAA:TGCTAAATTGAAAGGCTAATTACCATACGTGGTGGAAGATTGTAATCTCCAACAAA	TTTTTAACCAAG:TCTTCAAAGAAG	TC:CT	TT:CT	TACT:TACT	ACCTCCG:GCCTTCA	ACCTCCT:GCCTTCA	CAAC:GGAG	CGAG:GGAG	CGAC:GGAG	CAAAAAGAGT:CAAAAAGAGT	CAAAAGAGT:CAAAAGAGT	CGAAAGAGT:CGAAAGAGT	AA:CG	AG:AG	GTTAC:GTAAC	ATTGA:ATTGA	GGA:AGA	GATATATATC:GGTATATATC	AC:AC	GCA:GAA	GCG:GAA	ATAAAATAG:ATGAAATAG	CA:TG	CG:TG	CAT:GAA	CCT:GAA	GGA:GGAAATGGAAATAGA	CAACT:CAACT	TTTTTAACC:TCTTCAAAG	GC:GCTTTGCC	TAAAAGAAGGT:TAAAAAGAAGGT	ATTATAA:ATCTTATAA	AA	TCCCCTTCTCTCTCTG:TCCCCTTCTCTCTCTG	ATTAAA:ATTAAA	TAAGAAGT:TAAGAAGT	G:T	T:T	A:A	G:G	A:A	G:G	A:A	G:C
ORUS 4647U	TAA:TAA	ACTCCCCCA:ACTCCCCCA	ACTCCCCCA:ACTCCCCCA	TGCTAAAT:TGCTAAAT	TGCTAAATTGAAAGGCTAATTACCATACGTGGTGGAAGATTGTAATCTCCAACAAA:TGCTAAATTGAAAGGCTAATTACCATACGTGGTGGAAGATTGTAATCTCCAACAAA	TTTTTAACCAAG:TCTTCAAAGAAG	TC:CT	TT:CT	TACT:TACT	ACCTCCG:GCCTTCA	GCCTTCA:GCCTTCA	CAAC:GGAG	CGAG:GGAG	CGAC:GGAG	CAAAAAGAGT:CAAAAAGAGT	CAAAAGAGT:CAAAAGAGT	CGAAAGAGT:CGAAAGAGT	AA:CG	AG:AG	GTTAC:GTAAC	ATTGA:ATTGA	GGA:AGA	GATATATATC:GGTATATATC	AC:AC	GCA:GAA	GCG:GAA	ATAAAATAG:ATGAAATAG	CA:TG	CG:TG	CAT:GAA	CCT:GAA	GGA:GGAAATGGAAATAGA	CAACT:CAACT	TTTTTAACC:TCTTCAAAG	GC:GC	TAAAAGAAGGT:TAAAAAGAAGGT	ATTATAA:ATCTTATAA	AA	TCCCCTTCTCTCTCTG:TCCCCTTCTCTCTCTG	ATTAAA:ATTAAA	TAAGAAGT:TAAGAAGT	G:T	T:T	A:G	G:G	A:A	G:G	A:A	G:G
ORUS 4647V	TAA:TAA	ACTCCCCCA:ACTCCCCCA	ACTCCCCCA:ACTCCCCCA	TGCTAAAT:TGCTAAAT	TGCTAAATTGAAAGGCTAATTACCATACGTGGTGGAAGATTGTAATCTCCAACAAA:TGCTAAATTGAAAGGCTAATTACCATACGTGGTGGAAGATTGTAATCTCCAACAAA	TTTTTAACCAAG:TCTTCAAAGAAG	TC:CT	TT:CT	TACT:TACT	ACCTCCG:GCCTTCA	ACCTCCT:GCCTTCA	CAAC:GGAG	CGAG:GGAG	CGAC:GGAG	CAAAAAGAGT:CAAAAAGAGT	CAAAAGAGT:CAAAAGAGT	CGAAAGAGT:CGAAAGAGT	AA:CG	AG:AG	GTTAC:GTAAC	ATTGA:ATTGA	NA	GATATATATC:GGTATATATC	AC:AC	GCA:GAA	GCG:GAA	ATAAAATAG:ATGAAATAG	CA:TG	CG:TG	CAT:GAA	CCT:GAA	GGA:GGAAATGGAAATAGA	CAACT:CAACT	TTTTTAACC:TCTTCAAAG	GC:GCTTTGCC	TAAAAGAAGGT:TAAAAGAAGGT	ATTATAA:ATCTTATAA	AA	TCCCCTTCTCTCTCTG:TCCCCTTCTCTCTCTG	ATTAAA:ATTAAA	TAAGAAGT:TAAGAAGT	G:T	T:T	A:G	G:G	A:A	G:G	A:A	G:G
ORUS 4647W	TAA:TAA	ACTCCCCCA:ACTCCCCCA	ACTCCCCCA:ACTCCCCCA	TGCTAAAT:TGCTAAAT	TGCTAAATTGAAAGGCTAATTACCATACGTGGTGGAAGATTGTAATCTCCAACAAA:TGCTAAATTGAAAGGCTAATTACCATACGTGGTGGAAGATTGTAATCTCCAACAAA	TTTTTAACCAAG:TCTTCAAAGAAG	TC:CT	TT:CT	TACT:TACT	ACCTCCG:GCCTTCA	GCCTTCA:GCCTTCA	CAAC:GGAG	CGAG:GGAG	CGAC:GGAG	CAAAAAGAGT:CAAAAAGAGT	CAAAAGAGT:CAAAAGAGT	CGAAAGAGT:CGAAAGAGT	AA:CG	AG:CG	GTTAC:GTAAC	ATTGA:ATTGA	GGA:AGA	GATATATATC:GGTATATATC	AC:AC	GCA:GAA	GCG:GAA	ATAAAATAG:ATGAAATAG	CA:TG	CG:TG	CAT:GAA	CCT:GAA	GGA:GGAAATGGAAATAGA	CAACT:CAACT	TTTTTAACC:TCTTCAAAG	GC:GC	TAAAAGAAGGT:TAAAAAGAAGGT	ATTATAA:ATCTTATAA	AA	TCCCCTTCTCTCTCTG:TCCCCTTCTCTCTCTG	ATTAAA:ATTAAA	TAAGAAGT:TAAGAAGT	G:T	T:T	NA	A:G	A:A	G:G	A:A	G:C
ORUS 4650G	TAA:TAA	ACTCCCCCA:ACTCCCCCA	ACTCCCCCA:ACTCCCCCA	TGCTAAAT:TGCTAAAT	TGCTAAATTGAAAGGCTAATTACCATACGTGGTGGAAGATTGTAATCTCCAACAAA:TGCTAAATTGAAAGGCTAATTACCATACGTGGTGGAAGATTGTAATCTCCAACAAA	TTTTTAACCAAG:TCTTCAAAGAAG	NA	TT:CT	TACT:TACT	ACCTCCG:ACCTCCG	ACCTCCT:ACCTCCT	CAAC:CAAC	CGAG:CGAG	CGAC:CGAC	CAAAAAGAGT:CAAAAAGAGT	CAAAGAGT:CAAAAGAGT	NA	AA:CG	AG:CG	NA	ATTGA:ATTGA	NA	GATATATATC:GGTATATATC	NA	GCA:GAA	GCG:GAA	ATAAAATAG:ATGAAATAG	CA:TG	CG:TG	CAT:GAA	CCT:GAA	NA	CAACT:CAACT	TTTTTAACC:TCTTCAAAG	GC:GC	TAAAAGAAGGT:TAAAAAGAAGGT	ATTATAA:ATCTTATAA	NA	TCCCCTTCTCTCTCTG:TCCCCTTCTCTCTCTG	ATTAAA:ATTAAA	TAAGAAGT:TAAGAAGT	G:G	A:A	A:G	G:G	A:A	G:G	A:A	G:G
ORUS 4650H	NA	NA	NA	NA	NA	NA	NA	NA	NA	NA	NA	NA	NA	NA	NA	NA	NA	NA	NA	NA	NA	NA	NA	NA	NA	NA	NA	NA	NA	NA	NA	NA	NA	NA	NA	NA	NA	NA	NA	NA	TAAGAAGT:TAAGAAGT	NA	NA	NA	NA	NA	NA	NA	G:G
ORUS 4650J	TAA:TAA	ACTCCCCCA:ACTCCCCCA	ACTCCCCCA:ACTCCCCCA	TGCTAAAT:TGCTAAAT	TGCTAAATTGAAAGGCTAATTACCATACGTGGTGGAAGATTGTAATCTCCAACAAA:TGCTAAATTGAAAGGCTAATTACCATACGTGGTGGAAGATTGTAATCTCCAACAAA	TTTTTAACCAAG:TCTTCAAAGAAG	TC:CT	TT:CT	TACT:TACT	ACCTCCG:ACCTCCG	ACCTCCT:ACCTCCT	CAAC:CAAC	CGAG:CGAG	CGAC:CGAC	CAAAAAGAGT:CAAAAAGAGT	CAAAAGAGT:CAAAAGAGT	NA	CG:CG	AG:AG	GTTAC:GTTAC	ATTGA:ATTGA	GGA:AGA	GATATATATC:GGTATATATC	NA	GCA:GAA	GCG:GAA	ATAAAATAG:ATGAAATAG	CA:TG	CG:TG	CAT:GAA	CCT:GAA	GGA:GGAAATGGAAATAGA	CAACT:CAACT	TTTTTAACC:TCTTCAAAG	GC:GC	TAAAAGAAGGT:TAAAAAGAAGGT	ATTATAA:ATCTTATAA	AA	TCCCCTTCTCTCTCTG:TCCCCTTCTCTCTCTG	ATTAAA:ATTAAA	TAAGAAGT:TAAGAAGT	G:G	A:A	A:G	G:G	A:A	G:G	A:A	G:G
ORUS 4650K	NA	ACTCCCCCA:ACTCCCCCA	ACTCCCCCA:ACTCCCCCA	TGCTAAAT:TGCTAAAT	TGCTAAATTGAAAGGCTAATTACCATACGTGGTGGAAGATTGTAATCTCCAACAAA:TGCTAAATTGAAAGGCTAATTACCATACGTGGTGGAAGATTGTAATCTCCAACAAA	TTTTTAACCAAG:TCTTCAAAGAAG	TC:CT	TT:CT	TACT:TACT	ACCTCCG:GCCTTCA	ACCTCCT:GCCTTCA	CAAC:CAAC	CGAG:CGAG	CGAC:CGAC	CAAAAAGAGT:CAAAAAGAGT	CAAAAGAGT:CAAAAGAGT	NA	AA:CG	AG:AG	NA	ATTGA:ATTGA	GGA:AGA	GATATATATC:GGTATATATC	AC:GT	GCA:GAA	GCG:GAA	ATAAAATAG:ATGAAATAG	CA:TG	CG:TG	CAT:GAA	CCT:GAA	NA	CAACT:CAACT	TTTTTAACC:TCTTCAAAG	GC:GC	TAAAAGAAGGT:TAAAAAGAAGGT	ATTATAA:ATCTTATAA	AA	TCCCCTTCTCTCTCTG:TCCCCTTCTCTCTCTG	ATTAAA:ATTAAA	TAAGAAGT:TAAGAAGT	G:G	A:A	A:G	G:G	A:A	G:G	A:A	G:G
ORUS 4650M	TAA:TAA	ACTCCCCCA:ACTCCCCCA	ACTCCCCCA:ACTCCCCCA	TGCTAAAT:TGCTAAAT	TGCTAAATTGAAAGGCTAATTACCATACGTGGTGGAAGATTGTAATCTCCAACAAA:TGCTAAATTGAAAGGCTAATTACCATACGTGGTGGAAGATTGTAATCTCCAACAAA	TTTTTAACCAAG:TCTTCAAAGAAG	NA	TT:CT	TACT:TACT	ACCTCCG:ACCTCCG	ACCTCCT:ACCTCCT	CAAC:CAAC	CGAG:CGAG	CGAC:CGAC	CAAAAAGAGT:CAAAAAGAGT	CAAAGAGT:CAAAAGAGT	NA	CG:CG	AG:CG	GTTAC:GTTAC	NA	GGA:AGA	GATATATATC:GGTATATATC	AC:AC	GCA:GAA	GCG:GAA	ATAAAATAG:ATGAAATAG	CA:TG	CG:TG	CAT:GAA	CCT:GAA	NA	CAACT:CAACT	TTTTTAACC:TCTTCAAAG	GC:GC	TAAAAGAAGGT:TAAAAAGAAGGT	ATTATAA:ATCTTATAA	AA	TCCCCTTCTCTCTCTG:TCCCCTTCTCTCTCTG	ATTAAA:ATTAAA	TAAGAAGT:TAAGAAGT	G:G	A:A	A:G	G:G	A:A	G:G	A:A	G:G
ORUS 4650V	TAA:TAA	ACTCCCCCA:ACTCCCCCA	ACTCCCCCA:ACTCCCCCA	TGCTAAAT:TGCTAAAT	TGCTAAATTGAAAGGCTAATTACCATACGTGGTGGAAGATTGTAATCTCCAACAAA:TGCTAAATTGAAAGGCTAATTACCATACGTGGTGGAAGATTGTAATCTCCAACAAA	TTTTTAACCAAG:TCTTCAAAGAAG	NA	TT:CT	TACT:TACT	ACCTCCG:GCCTTCA	ACCTCCT:GCCTTCA	CAAC:CAAC	CGAG:CGAG	CGAC:CGAC	CAAAAAGAGT:CAAAAAGAGT	CAAAAGAGT:CAAAAGAGT	NA	AA:CG	AG:CG	GTTAC:GTTAC	ATTGA:ATTGA	GGA:AGA	GATATATATC:GGTATATATC	AC:AC	GCA:GAA	GCG:GAA	ATAAAATAG:ATAAAATAG	NA	NA	NA	CCT:CCT	GGA:GGAAATGGAAATAGA	CAACT:CAACT	TTTTTAACC:TCTTCAAAG	GC:GC	TAAAAGAAGGT:TAAAAAGAAGGT	ATTATAA:ATCTTATAA	AA	TCCCCTTCTCTCTCTG:TCCCCTTCTCTCTCTG	ATTAAA:ATTAAA	TAAGAAGT:TAAGAAGT	G:G	A:A	A:G	G:G	A:A	NA	A:A	G:G
ORUS 4650W	TAA:TAA	ACTCCCCCA:ACTCCCCCA	ACTCCCCCA:ACTCCCCCA	TGCTAAAT:TGCTAAAT	TGCTAAATTGAAAGGCTAATTACCATACGTGGTGGAAGATTGTAATCTCCAACAAA:TGCTAAATTGAAAGGCTAATTACCATACGTGGTGGAAGATTGTAATCTCCAACAAA	TCTTCAAAGAAG:TCTTCAAAGAAG	NA	TT:CT	TACT:TACT	ACCTCCG:GCCTTCA	NA	CAAC:CAAC	CGAG:CGAG	CGAC:CGAC	CAAAAAGAGT:CAAAAAGAGT	CAAAGAGT:CAAAAGAGT	NA	AA:CG	AG:AG	NA	ATTGA:ATTGA	GGA:AGA	GATATATATC:GGTATATATC	AC:AC	GCA:GAA	GCG:GAA	ATAAAATAG:ATGAAATAG	CA:TG	CG:TG	CAT:GAA	CCT:GAA	GGA:GGAAATGGAAATAGA	CAACT:CAACT	NA	GC:GC	TAAAAGAAGGT:TAAAAAGAAGGT	ATTATAA:ATCTTATAA	AA	TCCCCTTCTCTCTCTG:TCCCCTTCTCTCTCTG	ATTAAA:ATTAAA	TAAGAAGT:TAAGAAGT	G:G	A:A	A:G	G:G	A:A	G:G	A:A	G:G
ORUS 4651A	TAA:TAA	ACTCCCCCA:ACTCCCCCA	ACTCCCCCA:ACTCCCCCA	TGCTAAAT:TGCTAAAT	TGCTAAATTGAAAGGCTAATTACCATACGTGGTGGAAGATTGTAATCTCCAACAAA:TGCTAAATTGAAAGGCTAATTACCATACGTGGTGGAAGATTGTAATCTCCAACAAA	TTTTTAACCAAG:TCTTCAAAGAAG	TC:CT	TT:CT	TACT:TACT	ACCTCCG:GCCTTCA	GCCTTCA:GCCTTCA	CAAC:CAAC	CGAG:CGAG	CGAC:CGAC	CAAAAAGAGT:CAAAAAGAGT	CAAAGAGT:CAAAAGAGT	NA	AA:CG	AG:CG	GTTAC:GTAAC	ATTGA:ATTGA	GGA:AGA	GATATATATC:GGTATATATC	AC:AC	GCA:GAA	GCG:GAA	ATAAAATAG:ATAAAATAG	CA:CA	CG:CG	CAT:CAT	CCT:CCT	GGA:GGAAATGGAAATAGA	CAACT:CAACT	TTTTTAACC:TCTTCAAAG	GC:GC	TAAAAGAAGGT:TAAAAAGAAGGT	ATTATAA:ATCTTATAA	AA	TCCCCTTCTCTCTCTG:TCCCCTTCTCTCTCTG	ATTAAA:ATTAAA	TAAGAAGT:TAAGAAGT	G:T	T:T	A:G	A:G	A:A	G:G	A:A	G:G
ORUS 4651O	TAA:TAA	ACTCCCCCA:ACTCCCCCA	ACTCCCCCA:ACTCCCCCA	NA	TGCTAAATTGAAAGGCTAATTACCATACGTGGTGGAAGATTGTAATCTCCAACAAA:TGCTAAATTGAAAGGCTAATTACCATACGTGGTGGAAGATTGTAATCTCCAACAAA	TTTTTAACCAAG:TCTTCAAAGAAG	NA	TT:CT	TACT:TACT	NA	NA	CAAC:CAAC	CGAG:CGAG	NA	CAAAAAGAGT:CAAAAAGAGT	CAAAGAGT:CAAAAGAGT	NA	AA:CG	AG:CG	GTTAC:GTTAC	ATTGA:ATTGA	NA	GATATATATC:GGTATATATC	AC:AC	NA	GCG:GAA	ATAAAATAG:ATAAAATAG	CA:CA	CG:CG	CAT:CAT	CCT:CCT	NA	CAACT:CAACT	TTTTTAACC:TCTTCAAAG	NA	TAAAAGAAGGT:TAAAAAGAAGGT	ATTATAA:ATCTTATAA	AAACATACACAGCATGCGA:AAACATACACAGCATGCGA	TCCCCTTCTCTCTCTG:TCCCCTTCTCTCTCTG	ATTAAA:ATTAAA	TAAGAAGT:TAAGAAGT	G:T	T:T	A:G	A:G	NA	G:G	A:A	G:G
ORUS 4651T	TAA:TAA	ACTCCCCCA:ACTCCCCCA	ACTCCCCCA:ACTCCCCCA	TGCTAAAT:TGCTAAAT	TGCTAAATTGAAAGGCTAATTACCATACGTGGTGGAAGATTGTAATCTCCAACAAA:TGCTAAATTGAAAGGCTAATTACCATACGTGGTGGAAGATTGTAATCTCCAACAAA	TTTTTAACCAAG:TCTTCAAAGAAG	NA	CT:CT	TACT:TACT	ACCTCCG:ACCTCCG	ACCTCCT:GCCTTCA	CAAC:CAAC	CGAG:CGAG	CGAC:CGAC	CAAAAAGAGT:CAAAAAGAGT	CAAAGAGT:CAAAAGAGT	CGAAAGAGT:CGAAAGAGT	AA:CG	NA	NA	ATTGA:ATTGA	GGA:AGA	GATATATATC:GGTATATATC	AC:AC	GCA:GAA	GCG:GAA	ATAAAATAG:ATAAAATAG	CA:CA	CG:CG	CAT:CAT	CCT:CCT	NA	CAACT:CAACT	TTTTTAACC:TCTTCAAAG	GC:GC	TAAAAGAAGGT:TAAAAAGAAGGT	ATTATAA:ATCTTATAA	AA	TCCCCTTCTCTCTCTG:TCCCCTTCTCTCTCTG	ATTAAA:ATTAAA	TAAGAAGT:TAAGAAGT	G:T	T:T	A:G	G:G	A:A	G:G	A:A	G:G
ORUS 4651V	TAA:TAA	ACTCCCCCA:ACTCCCCCA	ACTCCCCCA:ACTCCCCCA	TGCTAAAT:TGCTAAAT	TGCTAAATTGAAAGGCTAATTACCATACGTGGTGGAAGATTGTAATCTCCAACAAA:TGCTAAATTGAAAGGCTAATTACCATACGTGGTGGAAGATTGTAATCTCCAACAAA	TTTTTAACCAAG:TCTTCAAAGAAG	TC:CT	TT:CT	TACT:TACT	ACCTCCG:ACCTCCG	ACCTCCT:ACCTCCT	CAAC:CAAC	CGAG:CGAG	CGAC:CGAC	CAAAAAGAGT:CAAAAAGAGT	CAAAGAGT:CAAAAGAGT	CGAAAGAGT:CGAAAGAGT	AA:CG	AG:AG	GTTAC:GTAAC	NA	GGA:AGA	GATATATATC:GGTATATATC	AC:AC	GCA:GAA	GCG:GAA	ATAAAATAG:ATAAAATAG	CA:CA	CG:CG	CAT:CAT	CCT:CCT	NA	CAACT:CAACT	TTTTTAACC:TCTTCAAAG	GC:GCTTTGCC	TAAAAGAAGGT:TAAAAAGAAGGT	ATTATAA:ATCTTATAA	AA	TCCCCTTCTCTCTCTG:TCCCCTTCTCTCTCTG	ATTAAA:ATTAAA	TAAGAAGT:TAAGAAGT	G:T	T:T	A:G	A:G	A:A	G:G	A:A	G:G
ORUS 4651W	TAA:TAA	ACTCCCCCA:ACTCCCCCA	ACTCCCCCA:ACTCCCCCA	TGCTAAAT:TGCTAAAT	TGCTAAATTGAAAGGCTAATTACCATACGTGGTGGAAGATTGTAATCTCCAACAAA:TGCTAAATTGAAAGGCTAATTACCATACGTGGTGGAAGATTGTAATCTCCAACAAA	TTTTTAACCAAG:TCTTCAAAGAAG	CT:CT	CT:CT	TACT:TACT	ACCTCCG:GCCTTCA	ACCTCCT:GCCTTCA	CAAC:CAAC	CGAG:CGAG	CGAC:CGAC	CAAAAAGAGT:CAAAAAGAGT	CAAAGAGT:CAAAAGAGT	CGAAAGAGT:CGAAAGAGT	AA:CG	AG:CG	GTTAC:GTAAC	ATTGA:ATTGA	GGA:AGA	GATATATATC:GGTATATATC	AC:AC	GCA:GAA	GCG:GAA	ATAAAATAG:ATAAAATAG	CA:CA	NA	CAT:CAT	CCT:CCT	NA	CAACT:CAACT	TTTTTAACC:TCTTCAAAG	GC:GCTTTGCC	TAAAAGAAGGT:TAAAAAGAAGGT	ATTATAA:ATCTTATAA	AA	TCCCCTTCTCTCTCTG:TCCCCTTCTCTCTCTG	ATTAAA:ATTAAA	TAAGAAGT:TAAGAAGT	G:T	T:T	A:G	G:G	A:A	G:G	A:A	G:G
ORUS 4660H	NA	NA	NA	NA	NA	NA	NA	NA	NA	NA	NA	NA	NA	NA	NA	NA	NA	NA	NA	GTTAC:GTTAC	NA	NA	NA	NA	GCA:GAA	NA	NA	NA	NA	NA	NA	NA	NA	NA	NA	NA	NA	AA	NA	NA	NA	NA	NA	NA	NA	NA	NA	A:A	G:G
ORUS 4660I	TAA:TAA	ACTCCCCCA:ACTCCCCCA	ACTCCCCCA:ACTCCCCCA	TGCTAAAT:TGCTAAAT	TGCTAAATTGAAAGGCTAATTACCATACGTGGTGGAAGATTGTAATCTCCAACAAA:TGCTAAATTGAAAGGCTAATTACCATACGTGGTGGAAGATTGTAATCTCCAACAAA	TTTTTAACCAAG:TCTTCAAAGAAG	TC:CT	TT:CT	TAAA:TACT	ACCTCCG:ACCTCCG	ACCTCCT:GCCTTCA	CAAC:CAAC	CGAG:CGAG	CGAC:CGAC	CAAAAAGAGT:CAAAAAGAGT	CAAAGAGT:CAAAAGAGT	NA	AA:CG	AG:AG	GTTAC:GTTAC	ATTGA:ATTGA	GGA:AGA	GATATATATC:GGTATATATC	AC:AC	GCA:GAA	GCG:GAA	ATAAAATAG:ATGAAATAG	CA:TG	CG:TG	CAT:GAA	CCT:GAA	GGA:GGAAATGGAAATAGA	CAACT:CAACT	TTTTTAACC:TCTTCAAAG	GC:GC	TAAAAGAAGGT:TAAAAAGAAGGT	ATTATAA:ATCTTATAA	AA	TCCCCTTCTCTCTCTG:TCCCCTTCTCTCTCTG	ATTAAA:ATTAAA	TAAGAAGT:TAAGAAGT	G:G	A:A	A:G	A:G	A:A	G:G	A:A	G:G
ORUS 4660K	TAA:TAA	NA	NA	TGCTAAAT:TGCTAAAT	TGCTAAATTGAAAGGCTAATTACCATACGTGGTGGAAGATTGTAATCTCCAACAAA:TGCTAAATTGAAAGGCTAATTACCATACGTGGTGGAAGATTGTAATCTCCAACAAA	TTTTTAACCAAG:TCTTCAAAGAAG	TC:CT	TT:CT	TACT:TACT	ACCTCCG:ACCTCCG	ACCTCCT:ACCTCCT	CAAC:CAAC	CGAG:CGAG	CGAC:CGAC	CAAAAAGAGT:CAAAAAGAGT	CAAAAGAGT:CAAAAGAGT	CGAAAGAGT:CGAAAGAGT	AA:CG	AG:AG	GTTAC:GTTAC	ATTGA:ATTGA	NA	GATATATATC:GGTATATATC	AC:GT	GCA:GAA	GCG:GAA	ATAAAATAG:ATGAAATAG	CA:TG	CG:TG	CAT:GAA	CCT:GAA	GGA:GGAAATGGAAATAGA	CAACT:CAACT	TTTTTAACC:TCTTCAAAG	GC:GC	TAAAAGAAGGT:TAAAAAGAAGGT	ATTATAA:ATCTTATAA	AA	TCCCCTTCTCTCTCTG:TCCCCTTCTCTCTCTG	ATTAAA:ATTAAA	TAAGAAGT:TAAGAAGT	G:T	T:T	A:G	G:G	A:A	G:G	A:A	G:G
ORUS 4660L	TAA:TAA	ACTCCCCCA:ACTCCCCCA	ACTCCCCCA:ACTCCCCCA	TGCTAAAT:TGCTAAAT	TGCTAAATTGAAAGGCTAATTACCATACGTGGTGGAAGATTGTAATCTCCAACAAA:TGCTAAATTGAAAGGCTAATTACCATACGTGGTGGAAGATTGTAATCTCCAACAAA	TTTTTAACCAAG:TCTTCAAAGAAG	TC:CT	TT:CT	TAAA:TACT	ACCTCCG:ACCTCCG	ACCTCCT:GCCTTCA	CAAC:CAAC	CGAG:CGAG	CGAC:CGAC	CAAAAAGAGT:CAAAAAGAGT	CAAAGAGT:CAAAAGAGT	NA	AA:CG	AG:AG	GTTAC:GTTAC	ATTGA:ATTGA	GGA:AGA	GATATATATC:GGTATATATC	AC:AC	GCA:GAA	GCG:GAA	ATAAAATAG:ATGAAATAG	CA:TG	CG:TG	CAT:GAA	CCT:GAA	GGA:GGAAATGGAAATAGA	CAACT:CAACT	TTTTTAACC:TCTTCAAAG	GC:GCTTTGCC	TAAAAGAAGGT:TAAAAAGAAGGT	ATTATAA:ATCTTATAA	AA	TCCCCTTCTCTCTCTG:TCCCCTTCTCTCTCTG	ATTAAA:ATTAAA	TAAGAAGT:TAAGAAGT	G:G	A:A	A:G	A:G	A:A	G:G	A:A	G:G
ORUS 4660O	TAA:TAA	NA	NA	TGCTAAAT:TGCTAAAT	TGCTAAATTGAAAGGCTAATTACCATACGTGGTGGAAGATTGTAATCTCCAACAAA:TGCTAAATTGAAAGGCTAATTACCATACGTGGTGGAAGATTGTAATCTCCAACAAA	TCTTCAAAGAAG:TCTTCAAAGAAG	TC:CT	TT:CT	TAAA:TACT	ACCTCCG:ACCTCCG	ACCTCCT:ACCTCCT	CAAC:CAAC	CGAG:CGAG	CGAC:CGAC	CAAAAAGAGT:CAAAAAGAGT	CAAAGAGT:CAAAAGAGT	CGAAAGAGT:CGAAAGAGT	AA:CG	AG:AG	GTTAC:GTTAC	ATTGA:ATTGA	GGA:AGA	GATATATATC:GGTATATATC	AC:GT	GCA:GAA	GCG:GAA	ATAAAATAG:ATAAAATAG	CA:CA	CG:CG	CAT:CAT	CCT:CCT	GGA:GGAAATGGAAATAGA	CAACT:CAACT	TCTTCAAAG:TCTTCAAAG	GC:GC	TAAAAGAAGGT:TAAAAAGAAGGT	ATTATAA:ATCTTATAA	AA	TCCCCTTCTCTCTCTG:TCCCCTTCTCTCTCTG	ATTAAA:ATTAAA	TAAGAAGT:TAAGAAGT	G:G	NA	A:G	A:G	A:A	G:G	A:A	G:G
ORUS 4660P	TAA:TAA	ACTCCCCCA:ACTCCCCCA	ACTCCCCCA:ACTCCCCCA	TGCTAAAT:TGCTAAAT	TGCTAAATTGAAAGGCTAATTACCATACGTGGTGGAAGATTGTAATCTCCAACAAA:TGCTAAATTGAAAGGCTAATTACCATACGTGGTGGAAGATTGTAATCTCCAACAAA	TTTTTAACCAAG:TCTTCAAAGAAG	TC:CT	TT:CT	TAAA:TACT	ACCTCCG:ACCTCCG	NA	CAAC:CAAC	CGAG:CGAG	CGAC:CGAC	CAAAAAGAGT:CAAAAAGAGT	CAAAGAGT:CAAAAGAGT	CGAAAGAGT:CGAAAGAGT	AA:CG	AG:AG	GTTAC:GTTAC	ATTGA:ATTGA	GGA:AGA	GATATATATC:GGTATATATC	AC:AC	GCA:GAA	GCG:GAA	ATAAAATAG:ATGAAATAG	CA:TG	CG:TG	CAT:GAA	CCT:GAA	GGA:GGAAATGGAAATAGA	CAACT:CAACT	TTTTTAACC:TCTTCAAAG	GC:GCTTTGCC	TAAAAGAAGGT:TAAAAAGAAGGT	ATTATAA:ATCTTATAA	AA	TCCCCTTCTCTCTCTG:TCCCCTTCTCTCTCTG	ATTAAA:ATTAAA	TAAGAAGT:TAAGAAGT	G:G	A:A	A:G	A:G	A:A	G:G	A:A	G:G
ORUS 4660Q	TAA:TAA	ACTCCCCCA:ACTCCCCCA	ACTCCCCCA:ACTCCCCCA	TGCTAAAT:TGCTAAAT	TGCTAAATTGAAAGGCTAATTACCATACGTGGTGGAAGATTGTAATCTCCAACAAA:TGCTAAATTGAAAGGCTAATTACCATACGTGGTGGAAGATTGTAATCTCCAACAAA	TTTTTAACCAAG:TCTTCAAAGAAG	TC:CT	TT:CT	NA	ACCTCCG:GCCTTCA	ACCTCCT:GCCTTCA	CAAC:GGAG	NA	CGAC:GGAG	CAAAAAGAGT:CAAAAAGAGT	CAAAAGAGT:CAAAAGAGT	CGAAAGAGT:CGAAAGAGT	AA:CG	AG:CG	NA	ATTGA:ATTGA	GGA:AGA	GATATATATC:GGTATATATC	NA	GCA:GAA	GCG:GAA	ATAAAATAG:ATGAAATAG	CA:TG	CG:TG	CAT:GAA	CCT:GAA	GGA:GGAAATGGAAATAGA	CAACT:CAACT	TTTTTAACC:TCTTCAAAG	GC:GC	TAAAAGAAGGT:TAAAAAGAAGGT	ATTATAA:ATCTTATAA	AA	TCCCCTTCTCTCTCTG:TCCCCTTCTCTCTCTG	ATTAAA:ATTAAA	TAAGAAGT:TAAGAAGT	G:T	A:T	A:G	NA	A:A	G:G	A:A	NA
ORUS 4660R	TAA:TAA	NA	NA	TGCTAAAT:TGCTAAAT	TGCTAAATTGAAAGGCTAATTACCATACGTGGTGGAAGATTGTAATCTCCAACAAA:TGCTAAATTGAAAGGCTAATTACCATACGTGGTGGAAGATTGTAATCTCCAACAAA	TTTTTAACCAAG:TCTTCAAAGAAG	TC:CT	TT:CT	TAAA:TACT	ACCTCCG:ACCTCCG	NA	CAAC:CAAC	CGAG:CGAG	CGAC:CGAC	CAAAAAGAGT:CAAAAAGAGT	CAAAGAGT:CAAAAGAGT	CGAAAGAGT:CGAAAGAGT	AA:CG	AG:CG	GTTAC:GTTAC	ATTGA:ATTGA	GGA:AGA	GATATATATC:GGTATATATC	AC:AC	GCA:GAA	GCG:GAA	ATAAAATAG:ATAAAATAG	CA:CA	CG:CG	CAT:CAT	CCT:CCT	GGA:GGAAATGGAAATAGA	CAACT:CAACT	TTTTTAACC:TCTTCAAAG	GC:GCTTTGCC	TAAAAGAAGGT:TAAAAAGAAGGT	ATTATAA:ATCTTATAA	AA	TCCCCTTCTCTCTCTG:TCCCCTTCTCTCTCTG	ATTAAA:ATTAAA	TAAGAAGT:TAAGAAGT	G:G	A:A	A:A	A:G	A:A	G:G	A:A	G:G
ORUS 4665A	TAA:TAA	ACTCCCCCA:ACTCCCCCA	ACTCCCCCA:ACTCCCCCA	TGCTAAAT:TGCTAAAT	TGCTAAATTGAAAGGCTAATTACCATACGTGGTGGAAGATTGTAATCTCCAACAAA:TGCTAAATTGAAAGGCTAATTACCATACGTGGTGGAAGATTGTAATCTCCAACAAA	TTTTTAACCAAG:TCTTCAAAGAAG	TC:CT	TT:CT	TACT:TACT	ACCTCCG:GCCTTCA	GCCTTCA:GCCTTCA	CAAC:CAAC	CGAG:CGAG	CGAC:CGAC	CAAAAAGAGT:CAAAAAGAGT	CAAAAGAGT:CAAAAGAGT	CGAAAGAGT:CGAAAGAGT	AA:CG	AG:CG	GTTAC:GTTAC	ATTGA:ATTGA	GGA:AGA	GATATATATC:GGTATATATC	NA	GCA:GAA	GCG:GAA	ATAAAATAG:ATGAAATAG	CA:TG	CG:TG	CAT:GAA	CCT:GAA	GGA:GGAAATGGAAATAGA	CAACT:CAACT	TTTTTAACC:TCTTCAAAG	GC:GC	TAAAAGAAGGT:TAAAAAGAAGGT	ATTATAA:ATCTTATAA	AAACATACACAGCATGCGA:AAACATACACAGCATGCGA	TCCCCTTCTCTCTCTG:TCCCCTTCTCTCTCTG	ATTAAA:ATTAAA	TAAGAAGT:TAAGAAGT	G:G	A:A	A:G	G:G	A:A	G:G	A:A	G:G
ORUS 4665F	TAA:TAA	ACTCCCCCA:ACTCCCCCA	ACTCCCCCA:ACTCCCCCA	TGCTAAAT:TGCTAAAT	TGCTAAATTGAAAGGCTAATTACCATACGTGGTGGAAGATTGTAATCTCCAACAAA:TGCTAAATTGAAAGGCTAATTACCATACGTGGTGGAAGATTGTAATCTCCAACAAA	TTTTTAACCAAG:TCTTCAAAGAAG	TC:CT	TT:CT	TAAA:TACT	ACCTCCG:ACCTCCG	ACCTCCT:ACCTCCT	CAAC:CAAC	CGAG:CGAG	CGAC:CGAC	CAAAAAGAGT:CAAAAAGAGT	CAAAGAGT:CAAAAGAGT	CGAAAGAGT:CGAAAGAGT	AA:CG	AG:CG	GTTAC:GTTAC	ATTGA:ATTGA	GGA:AGA	GATATATATC:GGTATATATC	NA	GCA:GAA	GCG:GAA	ATAAAATAG:ATAAAATAG	NA	CG:TG	NA	CCT:CCT	GGA:GGAAATGGAAATAGA	NA	TTTTTAACC:TCTTCAAAG	GC:GC	TAAAAGAAGGT:TAAAAAGAAGGT	ATTATAA:ATCTTATAA	AAACATACACAGCATGCGA:AAACATACACAGCATGCGA	TCCCCTTCTCTCTCTG:TCCCCTTCTCTCTCTG	ATTAAA:ATTAAA	TAAGAAGT:TAAGAAGT	G:G	A:A	A:G	G:G	A:A	G:G	A:A	G:G
ORUS 4665G	TAA:TAA	ACTCCCCCA:ACTCCCCCA	ACTCCCCCA:ACTCCCCCA	TGCTAAAT:TGCTAAAT	TGCTAAATTGAAAGGCTAATTACCATACGTGGTGGAAGATTGTAATCTCCAACAAA:TGCTAAATTGAAAGGCTAATTACCATACGTGGTGGAAGATTGTAATCTCCAACAAA	TTTTTAACCAAG:TCTTCAAAGAAG	TC:CT	TT:CT	TACT:TACT	ACCTCCG:ACCTCCG	ACCTCCT:ACCTCCT	CAAC:CAAC	CGAG:CGAG	CGAC:CGAC	CAAAAAGAGT:CAAAAAGAGT	CAAAAGAGT:CAAAAGAGT	CGAAAGAGT:CGAAAGAGT	AA:CG	AG:CG	GTTAC:GTTAC	ATTGA:ATTGA	GGA:AGA	GATATATATC:GGTATATATC	AC:GT	GCA:GAA	GCG:GAA	ATAAAATAG:ATAAAATAG	NA	NA	CAT:CAT	CCT:CCT	GGA:GGAAATGGAAATAGA	CAACT:CAACT	TTTTTAACC:TCTTCAAAG	GC:GC	TAAAAGAAGGT:TAAAAAGAAGGT	ATTATAA:ATCTTATAA	AA	TCCCCTTCTCTCTCTG:TCCCCTTCTCTCTCTG	ATTAAA:ATTAAA	TAAGAAGT:TAAGAAGT	G:G	A:A	A:G	G:G	A:A	G:G	A:A	G:G
ORUS 4665H	TAA:TAA	ACTCCCCCA:ACTCCCCCA	ACTCCCCCA:ACTCCCCCA	TGCTAAAT:TGCTAAAT	TGCTAAATTGAAAGGCTAATTACCATACGTGGTGGAAGATTGTAATCTCCAACAAA:TGCTAAATTGAAAGGCTAATTACCATACGTGGTGGAAGATTGTAATCTCCAACAAA	TTTTTAACCAAG:TCTTCAAAGAAG	TC:CT	TT:CT	TAAA:TACT	ACCTCCG:GCCTTCA	ACCTCCT:GCCTTCA	CAAC:CAAC	CGAG:CGAG	CGAC:CGAC	CAAAAAGAGT:CAAAAAGAGT	CAAAAGAGT:CAAAAGAGT	CGAAAGAGT:CGAAAGAGT	AA:CG	NA	GTTAC:GTTAC	NA	GGA:AGA	GATATATATC:GGTATATATC	AC:GT	GCA:GAA	GCG:GAA	ATAAAATAG:ATAAAATAG	NA	NA	NA	CCT:CCT	GGA:GGAAATGGAAATAGA	CAACT:CAACT	TTTTTAACC:TCTTCAAAG	GC:GC	TAAAAGAAGGT:TAAAAAGAAGGT	ATTATAA:ATCTTATAA	AA	TCCCCTTCTCTCTCTG:TCCCCTTCTCTCTCTG	ATTAAA:ATTAAA	TAAGAAGT:TAAGAAGT	G:G	A:A	A:G	G:G	A:A	G:G	A:A	G:G
ORUS 4665J	TAA:TAA	ACTCCCCCA:ACTCCCCCA	ACTCCCCCA:ACTCCCCCA	TGCTAAAT:TGCTAAAT	TGCTAAATTGAAAGGCTAATTACCATACGTGGTGGAAGATTGTAATCTCCAACAAA:TGCTAAATTGAAAGGCTAATTACCATACGTGGTGGAAGATTGTAATCTCCAACAAA	TTTTTAACCAAG:TCTTCAAAGAAG	TC:CT	TT:CT	TACT:TACT	ACCTCCG:GCCTTCA	GCCTTCA:GCCTTCA	CAAC:CAAC	CGAG:CGAG	CGAC:CGAC	CAAAAAGAGT:CAAAAAGAGT	CAAAAGAGT:CAAAAGAGT	NA	AA:CG	AG:CG	GTTAC:GTTAC	ATTGA:ATTGA	GGA:AGA	GATATATATC:GGTATATATC	AC:GT	GCA:GAA	GCG:GAA	ATAAAATAG:ATGAAATAG	CA:TG	CG:TG	CAT:GAA	CCT:GAA	GGA:GGAAATGGAAATAGA	CAACT:CAACT	TTTTTAACC:TCTTCAAAG	GC:GC	TAAAAGAAGGT:TAAAAAGAAGGT	ATTATAA:ATCTTATAA	AA	TCCCCTTCTCTCTCTG:TCCCCTTCTCTCTCTG	ATTAAA:ATTAAA	TAAGAAGT:TAAGAAGT	G:G	A:A	A:G	G:G	A:A	G:G	A:A	G:G
ORUS 4665K	TAA:TAA	ACTCCCCCA:ACTCCCCCA	ACTCCCCCA:ACTCCCCCA	TGCTAAAT:TGCTAAAT	NA	TTTTTAACCAAG:TCTTCAAAGAAG	TC:CT	TT:CT	NA	ACCTCCG:ACCTCCG	ACCTCCT:ACCTCCT	NA	NA	NA	CAAAAAGAGT:CAAAAAGAGT	CAAAAGAGT:CAAAAGAGT	CGAAAGAGT:CGAAAGAGT	AA:CG	AG:CG	GTTAC:GTTAC	ATTGA:ATTGA	GGA:AGA	GATATATATC:GGTATATATC	AC:GT	GCA:GAA	GCG:GAA	ATAAAATAG:ATAAAATAG	NA	NA	CAT:CAT	CCT:CCT	GGA:GGAAATGGAAATAGA	CAACT:CAACT	TTTTTAACC:TCTTCAAAG	GC:GC	NA	ATTATAA:ATCTTATAA	AA	TCCCCTTCTCTCTCTG:TCCCCTTCTCTCTCTG	ATTAAA:ATTAAA	TAAGAAGT:TAAGAAGT	G:G	A:A	A:G	G:G	A:A	G:G	A:A	G:G
ORUS 4665M	TAA:TAA	ACTCCCCCA:ACTCCCCCA	ACTCCCCCA:ACTCCCCCA	TGCTAAAT:TGCTAAAT	TGCTAAATTGAAAGGCTAATTACCATACGTGGTGGAAGATTGTAATCTCCAACAAA:TGCTAAATTGAAAGGCTAATTACCATACGTGGTGGAAGATTGTAATCTCCAACAAA	TTTTTAACCAAG:TCTTCAAAGAAG	TC:CT	TT:CT	TACT:TACT	ACCTCCG:ACCTCCG	ACCTCCT:ACCTCCT	CAAC:CAAC	CGAG:CGAG	CGAC:CGAC	CAAAAAGAGT:CAAAAAGAGT	CAAAGAGT:CAAAAGAGT	CGAAAGAGT:CGAAAGAGT	AA:CG	AG:AG	GTTAC:GTTAC	ATTGA:ATTGA	GGA:AGA	GATATATATC:GGTATATATC	AC:AC	GCA:GAA	GCG:GAA	ATAAAATAG:ATAAAATAG	NA	NA	NA	CCT:CCT	GGA:GGAAATGGAAATAGA	CAACT:CAACT	TTTTTAACC:TCTTCAAAG	GC:GC	TAAAAGAAGGT:TAAAAGAAGGT	ATTATAA:ATCTTATAA	AAACATACACAGCATGCGA:AAACATACACAGCATGCGA	TCCCCTTCTCTCTCTG:TCCCCTTCTCTCTCTG	ATTAAA:ATTAAA	TAAGAAGT:TAAGAAGT	G:G	A:A	A:G	G:G	A:A	G:G	A:A	G:G
ORUS 4665O	TAA:TAA	ACTCCCCCA:ACTCCCCCA	ACTCCCCCA:ACTCCCCCA	TGCTAAAT:TGCTAAAT	TGCTAAATTGAAAGGCTAATTACCATACGTGGTGGAAGATTGTAATCTCCAACAAA:TGCTAAATTGAAAGGCTAATTACCATACGTGGTGGAAGATTGTAATCTCCAACAAA	TTTTTAACCAAG:TCTTCAAAGAAG	TC:CT	TT:CT	TACT:TACT	ACCTCCG:ACCTCCG	ACCTCCT:ACCTCCT	CAAC:CAAC	CGAG:CGAG	CGAC:CGAC	CAAAAAGAGT:CAAAAAGAGT	CAAAGAGT:CAAAAGAGT	NA	AA:CG	AG:CG	GTTAC:GTTAC	ATTGA:ATTGA	GGA:AGA	GATATATATC:GGTATATATC	NA	GCA:GAA	GCG:GAA	ATAAAATAG:ATAAAATAG	CA:CA	CG:CG	CAT:CAT	CCT:CCT	GGAAATGGAAATAGA:GGAAATGGAAATAGA	CAACT:CAACT	TTTTTAACC:TCTTCAAAG	GC:GC	TAAAAGAAGGT:TAAAAAGAAGGT	ATTATAA:ATCTTATAA	AAACATACACAGCATGCGA:AAACATACACAGCATGCGA	TCCCCTTCTCTCTCTG:TCCCCTTCTCTCTCTG	ATTAAA:ATTAAA	TAAGAAGT:TAAGAAGT	G:G	A:A	A:G	G:G	A:A	G:G	A:A	G:G
ORUS 4665P	TAA:TAA	ACTCCCCCA:ACTCCCCCA	ACTCCCCCA:ACTCCCCCA	TGCTAAAT:TGCTAAAT	TGCTAAATTGAAAGGCTAATTACCATACGTGGTGGAAGATTGTAATCTCCAACAAA:TGCTAAATTGAAAGGCTAATTACCATACGTGGTGGAAGATTGTAATCTCCAACAAA	TTTTTAACCAAG:TCTTCAAAGAAG	TC:CT	TT:CT	TACT:TACT	ACCTCCG:ACCTCCG	ACCTCCT:ACCTCCT	CAAC:CAAC	CGAG:CGAG	CGAC:CGAC	CAAAAAGAGT:CAAAAAGAGT	CAAAGAGT:CAAAAGAGT	CGAAAGAGT:CGAAAGAGT	AA:CG	AG:AG	GTTAC:GTTAC	ATTGA:ATTGA	GGA:AGA	GATATATATC:GGTATATATC	AC:GT	GCA:GAA	GCG:GAA	ATAAAATAG:ATGAAATAG	CA:TG	CG:TG	CAT:GAA	CCT:GAA	GGA:GGAAATGGAAATAGA	CAACT:CAACT	TTTTTAACC:TCTTCAAAG	GC:GC	TAAAAGAAGGT:TAAAAAGAAGGT	ATTATAA:ATCTTATAA	AA	TCCCCTTCTCTCTCTG:TCCCCTTCTCTCTCTG	ATTAAA:ATTAAA	TAAGAAGT:TAAGAAGT	G:G	A:A	A:G	G:G	A:A	G:G	A:A	G:G
ORUS 4665Q	TAA:TAA	ACTCCCCCA:ACTCCCCCA	ACTCCCCCA:ACTCCCCCA	TGCTAAAT:TGCTAAAT	TGCTAAATTGAAAGGCTAATTACCATACGTGGTGGAAGATTGTAATCTCCAACAAA:TGCTAAATTGAAAGGCTAATTACCATACGTGGTGGAAGATTGTAATCTCCAACAAA	TTTTTAACCAAG:TCTTCAAAGAAG	TC:CT	TT:CT	TACT:TACT	ACCTCCG:ACCTCCG	ACCTCCT:ACCTCCT	CAAC:CAAC	CGAG:CGAG	CGAC:CGAC	CAAAAAGAGT:CAAAAAGAGT	CAAAAGAGT:CAAAAGAGT	CGAAAGAGT:CGAAAGAGT	AA:CG	AG:CG	GTTAC:GTTAC	ATTGA:ATTGA	GGA:AGA	GATATATATC:GGTATATATC	AC:AC	GCA:GAA	GCG:GAA	ATAAAATAG:ATGAAATAG	CA:TG	CG:TG	CAT:GAA	CCT:GAA	GGA:GGAAATGGAAATAGA	CAACT:CAACT	TTTTTAACC:TCTTCAAAG	GC:GC	TAAAAGAAGGT:TAAAAAGAAGGT	ATTATAA:ATCTTATAA	AA	TCCCCTTCTCTCTCTG:TCCCCTTCTCTCTCTG	ATTAAA:ATTAAA	TAAGAAGT:TAAGAAGT	G:G	A:A	A:G	G:G	A:A	G:G	A:A	G:G
ORUS 4665U	TAA:TAA	ACTCCCCCA:ACTCCCCCA	ACTCCCCCA:ACTCCCCCA	TGCTAAAT:TGCTAAAT	TGCTAAATTGAAAGGCTAATTACCATACGTGGTGGAAGATTGTAATCTCCAACAAA:TGCTAAATTGAAAGGCTAATTACCATACGTGGTGGAAGATTGTAATCTCCAACAAA	TTTTTAACCAAG:TCTTCAAAGAAG	TC:CT	TT:CT	TACT:TACT	ACCTCCG:ACCTCCG	NA	CAAC:CAAC	CGAG:CGAG	CGAC:CGAC	CAAAAAGAGT:CAAAAAGAGT	CAAAAGAGT:CAAAAGAGT	CGAAAGAGT:CGAAAGAGT	CG:CG	AG:CG	GTTAC:GTTAC	ATTGA:ATTGA	GGA:AGA	GATATATATC:GGTATATATC	NA	GCA:GAA	GCG:GAA	ATAAAATAG:ATGAAATAG	CA:TG	CG:TG	CAT:GAA	CCT:GAA	GGA:GGAAATGGAAATAGA	CAACT:CAACT	TTTTTAACC:TCTTCAAAG	GC:GC	NA	ATTATAA:ATCTTATAA	AA	TCCCCTTCTCTCTCTG:TCCCCTTCTCTCTCTG	ATTAAA:ATTAAA	TAAGAAGT:TAAGAAGT	G:G	A:A	A:G	G:G	A:A	G:G	A:A	G:G
ORUS 4665V	TAA:TAA	ACTCCCCCA:ACTCCCCCA	ACTCCCCCA:ACTCCCCCA	TGCTAAAT:TGCTAAAT	TGCTAAATTGAAAGGCTAATTACCATACGTGGTGGAAGATTGTAATCTCCAACAAA:TGCTAAATTGAAAGGCTAATTACCATACGTGGTGGAAGATTGTAATCTCCAACAAA	TTTTTAACCAAG:TCTTCAAAGAAG	TC:CT	TT:CT	TAAA:TACT	ACCTCCG:ACCTCCG	ACCTCCT:ACCTCCT	CAAC:CAAC	CGAG:CGAG	CGAC:CGAC	CAAAAAGAGT:CAAAAAGAGT	CAAAGAGT:CAAAAGAGT	CGAAAGAGT:CGAAAGAGT	AA:CG	AG:CG	GTTAC:GTTAC	ATTGA:ATTGA	GGA:AGA	GATATATATC:GGTATATATC	AC:AC	GCA:GAA	GCG:GAA	ATAAAATAG:ATAAAATAG	CA:CA	CG:CG	CAT:CAT	CCT:CCT	GGA:GGAAATGGAAATAGA	CAACT:CAACT	TTTTTAACC:TCTTCAAAG	GC:GC	TAAAAGAAGGT:TAAAAAGAAGGT	ATTATAA:ATCTTATAA	AA	TCCCCTTCTCTCTCTG:TCCCCTTCTCTCTCTG	ATTAAA:ATTAAA	TAAGAAGT:TAAGAAGT	G:G	A:A	A:G	G:G	A:A	G:G	A:A	G:G
ORUS 4665W	TAA:TAA	ACTCCCCCA:ACTCCCCCA	ACTCCCCCA:ACTCCCCCA	TGCTAAAT:TGCTAAAT	TGCTAAATTGAAAGGCTAATTACCATACGTGGTGGAAGATTGTAATCTCCAACAAA:TGCTAAATTGAAAGGCTAATTACCATACGTGGTGGAAGATTGTAATCTCCAACAAA	TTTTTAACCAAG:TCTTCAAAGAAG	TC:CT	TT:CT	TACT:TACT	ACCTCCG:GCCTTCA	ACCTCCT:GCCTTCA	CAAC:CAAC	CGAG:CGAG	CGAC:CGAC	CAAAAAGAGT:CAAAAAGAGT	CAAAGAGT:CAAAAGAGT	CGAAAGAGT:CGAAAGAGT	CG:CG	AG:CG	GTTAC:GTTAC	ATTGA:ATTGA	GGA:AGA	GATATATATC:GGTATATATC	AC:AC	GCA:GAA	GCG:GAA	ATAAAATAG:ATGAAATAG	CA:TG	CG:TG	CAT:GAA	CCT:GAA	NA	CAACT:CAACT	TTTTTAACC:TCTTCAAAG	GC:GC	TAAAAGAAGGT:TAAAAAGAAGGT	ATTATAA:ATCTTATAA	AA	TCCCCTTCTCTCTCTG:TCCCCTTCTCTCTCTG	ATTAAA:ATTAAA	TAAGAAGT:TAAGAAGT	G:G	A:A	A:G	G:G	A:A	G:G	A:A	G:G
ORUS 4674A	TAC:TAC	NA	ACCCCCCCA:ACTCCCCCA	TT:TGCTAAAT	TGCTAAATTGAAAGGCTAATTACCATACGTGGTGGAAGATTGTAATCTCCAACAAA:TTTAG	TTTTTAACCAAG:TCTTCAAAGAAG	CT:CT	CT:CT	TACT:TACT	ACCTCCG:ACCTCCG	NA	CAAC:CAAC	CGAG:CGAG	CGAC:CGAC	CAAAAAGAGT:CAAAAAGAGT	CAAAAGAGT:CAAAAGAGT	CGAAAGAGT:CGAAAGAGT	AA:CG	AG:AG	GTTAC:GTTAC	ATTGA:ATGA	GGA:GGA	GATATATATC:GGTATATATC	GT:GT	GAA:GAA	GAA:GAA	ATAAAATAG:ATAAAATAG	CA:CA	CG:CG	CAT:CAT	CCT:CCT	GGA:GGA	CAACT:CAAACT	TTTTTAACC:TCTTCAAAG	NA	TAAAAGAAGGT:TAAAAGAAGGT	ATCTTATAA:ATCTTATAA	AAACATACACAGCATGCGA:AAACATACACAGCATGCGA	TCCCCTTCTCTCTCCG:TCCCCTTCTCTCTCCG	ATTAAA:GTTTT	TAAGAAGT:TAGAAGT	G:G	A:A	A:A	A:G	T:A	G:G	A:A	G:G
ORUS 4674B	TAC:TAC	ACCCCCCA:ACTCCCCCA	ACCCCCCCA:ACTCCCCCA	TT:TGCTAAAT	TGCTAAATTGAAAGGCTAATTACCATACGTGGTGGAAGATTGTAATCTCCAACAAA:TTTAG	TTTTTAACCAAG:TCTTCAAAGAAG	CT:CT	CT:CT	TACT:TACT	ACCTCCG:ACCTCCG	ACCTCCT:ACCTCCT	CAAC:CAAC	CGAG:CGAG	NA	CAAAAAGAGT:CAAAAAGAGT	CAAAAGAGT:CAAAAGAGT	CGAAAGAGT:CGAAAGAGT	AA:CG	AG:AG	GTTAC:GTTAC	ATTGA:ATGA	GGA:GGA	GATATATATC:GATATATATC	AC:AC	GAA:GAA	GAA:GAA	ATAAAATAG:ATAAAATAG	CA:CA	CG:CG	CAT:CAT	CCT:CCT	GGA:GGA	CAACT:CAAACT	TTTTTAACC:TCTTCAAAG	NA	TAAAAGAAGGT:TAAAAGAAGGT	ATCTTATAA:ATCTTATAA	AA	TCCCCTTCTCTCTCCG:TCCCCTTCTCTCTCCG	ATTAAA:ATTAAA	TAAGAAGT:TAAGAAGT	G:G	A:A	A:A	A:G	NA	G:G	A:A	G:G
ORUS 4674C	TAC:TAC	ACCCCCCA:ACTCCCCCA	ACCCCCCCA:ACTCCCCCA	NA	TGCTAAATTGAAAGGCTAATTACCATACGTGGTGGAAGATTGTAATCTCCAACAAA:TTTAG	TTTTTAACCAAG:TCTTCAAAGAAG	CT:CT	CT:CT	TACT:TACT	ACCTCCG:ACCTCCG	ACCTCCT:GCCTTCA	CAAC:CAAC	CGAG:CGAG	CGAC:CGAC	CAAAAAGAGT:CAAAAAGAGT	CAAAAGAGT:CAAAAGAGT	CGAAAGAGT:CGAAAGAGT	AA:CG	AG:AG	GTTAC:GTTAC	ATTGA:ATGA	GGA:GGA	GATATATATC:GGTATATATC	GT:GT	GAA:GAA	GAA:GAA	ATAAAATAG:ATAAAATAG	CA:CA	CG:CG	CAT:CAT	CCT:CCT	GGA:GGA	CAACT:CAAACT	TTTTTAACC:TCTTCAAAG	NA	TAAAAGAAGGT:TAAAAGAAGGT	ATCTTATAA:ATCTTATAA	AA	TCCCCTTCTCTCTCCG:TCCCCTTCTCTCTCCG	ATTAAA:GTTTT	TAAGAAGT:TAGAAGT	G:G	A:A	A:A	G:G	T:A	G:C	A:G	G:G
ORUS 4674F	TAC:TAC	ACCCCCCA:ACTCCCCCA	ACCCCCCCA:ACTCCCCCA	TGCTAAAT:TGCTAAAT	TGCTAAATTGAAAGGCTAATTACCATACGTGGTGGAAGATTGTAATCTCCAACAAA:TGCTAAATTGAAAGGCTAATTACCATACGTGGTGGAAGATTGTAATCTCCAACAAA	TTTTTAACCAAG:TCTTCAAAGAAG	CT:CT	CT:CT	TACT:TACT	ACCTCCG:ACCTCCG	ACCTCCT:ACCTCCT	CAAC:CAAC	CGAG:CGAG	CGAC:CGAC	CAAAAAGAGT:CAAAAAGAGT	CAAAAGAGT:CAAAAGAGT	NA	AA:CG	AG:AG	GTTAC:GTTAC	ATTGA:ATGA	GGA:GGA	GATATATATC:GGTATATATC	AC:GT	GAA:GAA	GAA:GAA	ATAAAATAG:ATAAAATAG	CA:CA	CG:CG	CAT:CAT	CCT:CCT	GGA:GGA	CAACT:CAAACT	TTTTTAACC:TCTTCAAAG	NA	TAAAAGAAGGT:TAAAAGAAGGT	ATCTTATAA:ATCTTATAA	AA	TCCCCTTCTCTCTCCG:TCCCCTTCTCTCTCCG	ATTAAA:GTTTT	TAAGAAGT:TAAGAAGT	G:G	A:A	A:A	A:G	T:A	G:G	A:A	G:G
ORUS 4674G	TAC:TAC	ACCCCCCA:ACTCCCCCA	ACCCCCCCA:ACTCCCCCA	TT:TGCTAAAT	TGCTAAATTGAAAGGCTAATTACCATACGTGGTGGAAGATTGTAATCTCCAACAAA:TTTAG	TTTTTAACCAAG:TCTTCAAAGAAG	CT:CT	CT:CT	TACT:TACT	ACCTCCG:ACCTCCG	ACCTCCT:ACCTCCT	CAAC:CAAC	CGAG:CGAG	CGAC:CGAC	CAAAAAGAGT:CAAAAAGAGT	CAAAAGAGT:CAAAAGAGT	CGAAAGAGT:CGAAAGAGT	AA:CG	AG:AG	GTTAC:GTTAC	ATTGA:ATGA	GGA:GGA	GATATATATC:GGTATATATC	AC:GT	GAA:GAA	GAA:GAA	ATAAAATAG:ATAAAATAG	CA:CA	CG:CG	CAT:CAT	CCT:CCT	GGA:GGA	CAACT:CAACT	TTTTTAACC:TCTTCAAAG	NA	TAAAAGAAGGT:TAAAAGAAGGT	ATCTTATAA:ATCTTATAA	AA	TCCCCTTCTCTCTCCG:TCCCCTTCTCTCTCCG	ATTAAA:ATTAAA	TAAGAAGT:TAGAAGT	G:G	A:A	A:A	A:G	T:A	G:G	A:A	G:G
ORUS 4674H	TAC:TAC	ACCCCCCA:ACTCCCCCA	ACCCCCCCA:ACTCCCCCA	TT:TGCTAAAT	TGCTAAATTGAAAGGCTAATTACCATACGTGGTGGAAGATTGTAATCTCCAACAAA:TTTAG	TTTTTAACCAAG:TCTTCAAAGAAG	CT:CT	CT:CT	TACT:TACT	ACCTCCG:ACCTCCG	NA	CAAC:CAAC	CGAG:CGAG	CGAC:CGAC	CAAAAAGAGT:CAAAAAGAGT	CAAAAGAGT:CAAAAGAGT	CGAAAGAGT:CGAAAGAGT	AA:CG	AG:AG	GTTAC:GTTAC	ATTGA:ATGA	GGA:GGA	GATATATATC:GGTATATATC	AC:GT	GAA:GAA	GAA:GAA	ATAAAATAG:ATAAAATAG	CA:CA	CG:CG	CAT:CAT	CCT:CCT	GGA:GGA	CAACT:CAAACT	TTTTTAACC:TCTTCAAAG	NA	TAAAAGAAGGT:TAAAAGAAGGT	ATCTTATAA:ATCTTATAA	AA	TCCCCTTCTCTCTCCG:TCCCCTTCTCTCTCCG	ATTAAA:GTTTT	TAAGAAGT:TAGAAGT	G:G	A:A	A:A	A:G	T:A	G:G	A:A	G:G
ORUS 4674L	NA	ACTCCCCCA:ACTCCCCCA	ACTCCCCCA:ACTCCCCCA	TT:TGCTAAAT	TGCTAAATTGAAAGGCTAATTACCATACGTGGTGGAAGATTGTAATCTCCAACAAA:TTTAG	TTTTTAACCAAG:TCTTCAAAGAAG	CT:CT	CT:CT	TACT:TACT	ACCTCCG:ACCTCCG	NA	CAAC:CAAC	CGAG:CGAG	CGAC:CGAC	CAAAAAGAGT:CAAAAAGAGT	CAAAAGAGT:CAAAAGAGT	NA	AA:CG	AG:AG	GTTAC:GTTAC	ATTGA:ATGA	GGA:GGA	GATATATATC:GGTATATATC	AC:GT	GAA:GAA	GAA:GAA	ATAAAATAG:ATAAAATAG	CA:CA	CG:CG	CAT:CAT	CCT:CCT	GGA:GGA	CAACT:CAAACT	TTTTTAACC:TCTTCAAAG	GC:GC	TAAAAGAAGGT:TAAAAGAAGGT	NA	AA	TCCCCTTCTCTCTCCG:TCCCCTTCTCTCTCCG	ATTAAA:GTTTT	TAAGAAGT:TAAGAAGT	G:G	A:A	A:A	A:G	T:A	G:C	A:G	G:G
ORUS 4674M	TAC:TAC	NA	NA	TT:TGCTAAAT	TGCTAAATTGAAAGGCTAATTACCATACGTGGTGGAAGATTGTAATCTCCAACAAA:TTTAG	TTTTTAACCAAG:TCTTCAAAGAAG	CT:CT	CT:CT	TACT:TACT	ACCTCCG:ACCTCCG	NA	CAAC:CAAC	CGAG:CGAG	CGAC:CGAC	CAAAAAGAGT:CAAAAAGAGT	NA	NA	AA:CG	AG:AG	GTTAC:GTTAC	ATTGA:ATGA	GGA:GGA	GATATATATC:GGTATATATC	AC:GT	GAA:GAA	GAA:GAA	ATAAAATAG:ATAAAATAG	CA:CA	CG:CG	CAT:CAT	CCT:CCT	GGA:GGA	CAACT:CAAACT	TTTTTAACC:TCTTCAAAG	NA	TAAAAGAAGGT:TAAAAGAAGGT	ATCTTATAA:ATCTTATAA	AA	TCCCCTTCTCTCTCCG:TCCCCTTCTCTCTCCG	ATTAAA:GTTTT	TAAGAAGT:TAGAAGT	G:G	A:A	A:A	G:G	NA	G:C	A:G	G:G
ORUS 4674O	TAC:TAC	ACCCCCCA:ACTCCCCCA	ACCCCCCCA:ACTCCCCCA	TT:TGCTAAAT	TGCTAAATTGAAAGGCTAATTACCATACGTGGTGGAAGATTGTAATCTCCAACAAA:TTTAG	TTTTTAACCAAG:TCTTCAAAGAAG	CT:CT	CT:CT	TACT:TACT	ACCTCCG:ACCTCCG	NA	CAAC:CAAC	CGAG:CGAG	CGAC:CGAC	CAAAAAGAGT:CAAAAAGAGT	CAAAAGAGT:CAAAAGAGT	CGAAAGAGT:CGAAAGAGT	AA:CG	AG:AG	GTTAC:GTTAC	ATTGA:ATGA	GGA:GGA	GATATATATC:GGTATATATC	AC:GT	GAA:GAA	GAA:GAA	ATAAAATAG:ATAAAATAG	CA:CA	CG:CG	CAT:CAT	CCT:CCT	GGA:GGA	CAACT:CAAACT	TTTTTAACC:TCTTCAAAG	NA	TAAAAGAAGGT:TAAAAGAAGGT	ATCTTATAA:ATCTTATAA	AA	TCCCCTTCTCTCTCCG:TCCCCTTCTCTCTCCG	ATTAAA:ATTAAA	TAAGAAGT:TAGAAGT	G:G	A:A	A:A	G:G	T:A	G:C	A:G	G:G
ORUS 4674Q	TAC:TAC	ACCCCCCA:ACTCCCCCA	ACCCCCCCA:ACTCCCCCA	TGCTAAAT:TGCTAAAT	TGCTAAATTGAAAGGCTAATTACCATACGTGGTGGAAGATTGTAATCTCCAACAAA:TGCTAAATTGAAAGGCTAATTACCATACGTGGTGGAAGATTGTAATCTCCAACAAA	TTTTTAACCAAG:TCTTCAAAGAAG	CT:CT	CT:CT	TACT:TACT	ACCTCCG:ACCTCCG	ACCTCCT:ACCTCCT	CAAC:CAAC	CGAG:CGAG	CGAC:CGAC	CAAAAAGAGT:CAAAAAGAGT	CAAAAGAGT:CAAAAGAGT	CGAAAGAGT:CGAAAGAGT	AA:CG	AG:AG	GTTAC:GTTAC	NA	GGA:GGA	GATATATATC:GGTATATATC	AC:GT	GAA:GAA	GAA:GAA	ATAAAATAG:ATAAAATAG	CA:CA	CG:CG	CAT:CAT	CCT:CCT	GGA:GGA	CAACT:CAAACT	TTTTTAACC:TCTTCAAAG	NA	TAAAAGAAGGT:TAAAAGAAGGT	ATCTTATAA:ATCTTATAA	AA	TCCCCTTCTCTCTCCG:TCCCCTTCTCTCTCCG	ATTAAA:ATTAAA	TAAGAAGT:TAAGAAGT	G:G	A:A	A:A	A:G	T:A	G:C	A:G	G:G
ORUS 4674R	TAC:TAC	ACCCCCCA:ACTCCCCCA	ACCCCCCCA:ACTCCCCCA	TT:TGCTAAAT	TGCTAAATTGAAAGGCTAATTACCATACGTGGTGGAAGATTGTAATCTCCAACAAA:TTTAG	TTTTTAACCAAG:TCTTCAAAGAAG	CT:CT	CT:CT	TACT:TACT	ACCTCCG:ACCTCCG	ACCTCCT:ACCTCCT	CAAC:CAAC	CGAG:CGAG	CGAC:CGAC	CAAAAAGAGT:CAAAAAGAGT	CAAAAGAGT:CAAAAGAGT	CGAAAGAGT:CGAAAGAGT	AA:CG	AG:AG	GTTAC:GTTAC	ATTGA:ATGA	GGA:GGA	GATATATATC:GGTATATATC	GT:GT	GAA:GAA	GAA:GAA	ATAAAATAG:ATAAAATAG	CA:CA	CG:CG	CAT:CAT	CCT:CCT	GGA:GGA	CAACT:CAAACT	TTTTTAACC:TCTTCAAAG	NA	TAAAAGAAGGT:TAAAAGAAGGT	ATCTTATAA:ATCTTATAA	AA	TCCCCTTCTCTCTCCG:TCCCCTTCTCTCTCCG	ATTAAA:ATTAAA	TAAGAAGT:TAAGAAGT	G:G	A:A	A:A	A:G	T:A	G:C	A:G	G:G
A-2418T	NA	NA	NA	NA	NA	TTTTTAACCAAG:TCTTCAAAGAAG	NA	NA	NA	NA	NA	NA	NA	NA	NA	NA	NA	NA	AG:AG	GTTAC:GTTAC	NA	NA	NA	NA	GAA:GAA	GAA:GAA	NA	NA	NA	NA	NA	GGA:GGA	NA	NA	NA	NA	NA	AA	TCCCCTTCTCTCTCCG:TCCCCTTCTCTCTCCG	NA	TAAGAAGT:TAAGAAGT	NA	NA	NA	A:A	NA	NA	A:A	G:C
A-2444T	NA	NA	NA	NA	NA	TTTTTAACCAAG:TCTTCAAAGAAG	NA	NA	NA	NA	NA	NA	NA	NA	NA	NA	NA	NA	AG:AG	GTTAC:GTTAC	NA	NA	NA	NA	GAA:GAA	GAA:GAA	NA	NA	NA	NA	NA	GGA:GGA	NA	NA	NA	NA	NA	AA	NA	NA	TAAGAAGT:TAAGAAGT	NA	NA	NA	NA	NA	NA	NA	G:G
Ponca	TAC:TAC	ACCCCCCA:ACTCCCCCA	ACCCCCCCA:ACTCCCCCA	TT:TGCTAAAT	TGCTAAATTGAAAGGCTAATTACCATACGTGGTGGAAGATTGTAATCTCCAACAAA:TTTAG	TTTTTAACCAAG:TCTTCAAAGAAG	CT:CT	CT:CT	TACT:TACT	ACCTCCG:ACCTCCG	ACCTCCT:ACCTCCT	CAAC:CAAC	CGAG:CGAG	CGAC:CGAC	CAAAAAGAGT:CAAAAAGAGT	CAAAAGAGT:CAAAAGAGT	CGAAAGAGT:CGAAAGAGT	AA:CG	AG:AG	GTTAC:GTTAC	ATTGA:ATGA	GGA:GGA	GATATATATC:GATATATATC	AC:AC	GAA:GAA	GAA:GAA	ATAAAATAG:ATAAAATAG	CA:CA	CG:CG	CAT:CAT	CCT:CCT	GGA:GGA	CAACT:CAAACT	TTTTTAACC:TCTTCAAAG	NA	TAAAAGAAGGT:TAAAAGAAGGT	ATCTTATAA:ATCTTATAA	AA	TCCCCTTCTCTCTCCG:TCCCCTTCTCTCTCCG	ATTAAA:ATTAAA	TAAGAAGT:TAAGAAGT	G:G	A:A	A:A	A:G	T:A	G:G	A:A	G:G
A-2454T	TAC:TAC	Uncallable	ACCCCCCCA:ACTCCCCCA	TT:TGCTAAAT	TGCTAAATTGAAAGGCTAATTACCATACGTGGTGGAAGATTGTAATCTCCAACAAA:TTTAG	TTTTTAACCAAG:TCTTCAAAGAAG	CT:CT	CT:CT	TACT:TACT	ACCTCCG:ACCTCCG	ACCTCCT:ACCTCCT	CAAC:CAAC	CGAG:CGAG	CGAC:CGAC	CAAAAAGAGT:CAAAAAGAGT	CAAAAGAGT:CAAAAGAGT	CGAAAGAGT:CGAAAGAGT	AA:CG	AG:AG	GTTAC:GTTAC	ATTGA:ATGA	GGA:GGA	GATATATATC:GATATATATC	AC:AC	GAA:GAA	GAA:GAA	ATAAAATAG:ATAAAATAG	CA:CA	CG:CG	CAT:CAT	CCT:CCT	GGA:GGA	CAACT:CAAACT	TTTTTAACC:TCTTCAAAG	NA	TAAAAGAAGGT:TAAAAGAAGGT	ATCTTATAA:ATCTTATAA	NA	TCCCCTTCTCTCTCCG:TCCCCTTCTCTCTCCG	ATTAAA:ATTAAA	TAAGAAGT:TAGAAGT	G:G	A:A	A:A	A:G	T:A	G:G	A:A	NA
A-2466T	TAC:TAC	ACCCCCCA:ACTCCCCCA	ACCCCCCCA:ACTCCCCCA	TGCTAAAT:TGCTAAAT	TGCTAAATTGAAAGGCTAATTACCATACGTGGTGGAAGATTGTAATCTCCAACAAA:TGCTAAATTGAAAGGCTAATTACCATACGTGGTGGAAGATTGTAATCTCCAACAAA	TTTTTAACCAAG:TCTTCAAAGAAG	CT:CT	CT:CT	TACT:TACT	ACCTCCG:ACCTCCG	ACCTCCT:ACCTCCT	CAAC:CAAC	CGAG:CGAG	CGAC:CGAC	CAAAAAGAGT:CAAAAAGAGT	CAAAAGAGT:CAAAAGAGT	CGAAAGAGT:CGAAAGAGT	AA:AA	AG:AG	GTTAC:GTTAC	ATTGA:ATGA	GGA:GGA	GATATATATC:GATATATATC	NA	GAA:GAA	GAA:GAA	NA	CA:CA	CG:CG	CAT:CAT	CCT:CCT	GGA:GGA	CAACT:CAAACT	TTTTTAACC:TCTTCAAAG	NA	TAAAAGAAGGT:TAAAAGAAGGT	ATCTTATAA:ATCTTATAA	AAACATACACAGCATGCGA:AAACATACACAGCATGCGA	TCCCCTTCTCTCTCCG:TCCCCTTCTCTCTCCG	ATTAAA:ATTAAA	TAAGAAGT:TAAGAAGT	G:G	A:A	A:A	A:G	T:A	G:G	A:A	G:G
A-2487T	TAC:TAC	ACTCCCCCA:ACTCCCCCA	ACTCCCCCA:ACTCCCCCA	TGCTAAAT:TGCTAAAT	TGCTAAATTGAAAGGCTAATTACCATACGTGGTGGAAGATTGTAATCTCCAACAAA:TGCTAAATTGAAAGGCTAATTACCATACGTGGTGGAAGATTGTAATCTCCAACAAA	TTTTTAACCAAG:TCTTCAAAGAAG	CT:CT	CT:CT	TACT:TACT	ACCTCCG:ACCTCCG	ACCTCCT:ACCTCCT	CAAC:CAAC	CGAG:CGAG	CGAC:CGAC	CAAAAAGAGT:CAAAAAGAGT	CAAAAGAGT:CAAAAGAGT	CGAAAGAGT:CGAAAGAGT	AA:CG	AG:AG	GTTAC:GTTAC	ATTGA:ATGA	GGA:GGA	GATATATATC:GGTATATATC	GT:GT	GAA:GAA	GAA:GAA	ATAAAATAG:ATAAAATAG	CA:CA	CG:CG	CAT:CAT	CCT:CCT	GGA:GGA	CAACT:CAAACT	TTTTTAACC:TCTTCAAAG	NA	TAAAAGAAGGT:TAAAAGAAGGT	ATCTTATAA:ATCTTATAA	AA	TCCCCTTCTCTCTCCG:TCCCCTTCTCTCTCCG	ATTAAA:ATTAAA	TAAGAAGT:TAGAAGT	G:G	A:A	A:A	A:G	T:A	G:G	A:A	G:G
A-2488	TAA:TAA	ACTCCCCCA:ACTCCCCCA	ACTCCCCCA:ACTCCCCCA	TGCTAAAT:TGCTAAAT	TGCTAAATTGAAAGGCTAATTACCATACGTGGTGGAAGATTGTAATCTCCAACAAA:TGCTAAATTGAAAGGCTAATTACCATACGTGGTGGAAGATTGTAATCTCCAACAAA	TTTTTAACCAAG:TCTTCAAAGAAG	CT:CT	CT:CT	TACT:TACT	ACCTCCG:ACCTCCG	ACCTCCT:ACCTCCT	CAAC:CAAC	CGAG:CGAG	CGAC:CGAC	CAAAAAGAGT:CAAAAAGAGT	CAAAAGAGT:CAAAAGAGT	CGAAAGAGT:CGAAAGAGT	AA:CG	AG:AG	GTTAC:GTTAC	ATTGA:ATTGA	GGA:GGA	GATATATATC:GGTATATATC	AC:GT	GAA:GAA	GAA:GAA	ATAAAATAG:ATAAAATAG	CA:CA	CG:CG	CAT:CAT	CCT:CCT	GGA:GGA	CAACT:CAAACT	TTTTTAACC:TCTTCAAAG	GC:GCTTTGCC	TAAAAGAAGGT:TAAAAGAAGGT	ATCTTATAA:ATCTTATAA	AA	TCCCCTTCTCTCTCCG:TCCCCTTCTCTCTCCG	ATTAAA:ATTAAA	TAAGAAGT:TAAGAAGT	G:G	A:A	A:A	A:G	A:A	G:G	A:A	G:G
APF-238T	TAC:TAC	ACCCCCCA:ACTCCCCCA	ACCCCCCCA:ACTCCCCCA	NA	TGCTAAATTGAAAGGCTAATTACCATACGTGGTGGAAGATTGTAATCTCCAACAAA:TGCTAAATTGAAAGGCTAATTACCATACGTGGTGGAAGATTGTAATCTCCAACAAA	TTTTTAACCAAG:TCTTCAAAGAAG	NA	NA	TACT:TACT	ACCTCCG:ACCTCCG	NA	NA	CGAG:CGAG	NA	NA	NA	NA	AA:AA	AG:AG	GTTAC:GTTAC	NA	GGA:GGA	GATATATATC:GATATATATC	AC:AC	GAA:GAA	GAA:GAA	ATAAAATAG:ATAAAATAG	NA	NA	NA	CCT:CCT	GGA:GGA	CAACT:CAACT	NA	NA	TAAAAGAAGGT:TAAAAGAAGGT	ATCTTATAA:ATCTTATAA	AA	TCCCCTTCTCTCTCCG:TCCCCTTCTCTCTCCG	ATTAAA:ATTAAA	TAAGAAGT:TAAGAAGT	G:G	NA	NA	G:G	A:A	G:G	A:A	G:G
Bassettberry	TAA:TAA	ACTCCCCCA:ACTCCCCCA	ACTCCCCCA:ACTCCCCCA	TGCTAAAT:TGCTAAAT	TGCTAAATTGAAAGGCTAATTACCATACGTGGTGGAAGATTGTAATCTCCAACAAA:TGCTAAATTGAAAGGCTAATTACCATACGTGGTGGAAGATTGTAATCTCCAACAAA	TTTTTAACCAAG:TCTTCAAAGAAG	TC:CT	TT:CT	TACT:TACT	ACCTCCG:ACCTCCG	NA	CAAC:CAAC	CGAG:CGAG	CGAC:CGAC	CAAAAAGAGT:CAAAAAGAGT	CAAAGAGT:CAAAAGAGT	NA	CG:CG	AG:CG	GTTAC:GTTAC	ATTGA:ATTGA	GGA:AGA	GATATATATC:GGTATATATC	AC:AC	NA	NA	ATAAAATAG:ATGAAATAG	CA:TG	CG:TG	CAT:GAA	CCT:GAA	GGAAATGGAAATAGA:GGAAATGGAAATAGA	CAACT:CAACT	TTTTTAACC:TCTTCAAAG	GC:GC	TAAAAGAAGGT:TAAAAAGAAGGT	NA	AAACATACACAGCATGCGA:AAACATACACAGCATGCGA	TCCCCTTCTCTCTCTG:TCCCCTTCTCTCTCTG	ATTAAA:ATTAAA	TAAGAAGT:TAAGAAGT	G:G	A:A	NA	G:G	A:A	G:G	A:A	G:G
Boysen	TAA:TAA	ACTCCCCCA:ACTCCCCCA	ACTCCCCCA:ACTCCCCCA	TGCTAAAT:TGCTAAAT	TGCTAAATTGAAAGGCTAATTACCATACGTGGTGGAAGATTGTAATCTCCAACAAA:TGCTAAATTGAAAGGCTAATTACCATACGTGGTGGAAGATTGTAATCTCCAACAAA	TTTTTAACCAAG:TCTTCAAAGAAG	TC:CT	TT:CT	NA	ACCTCCG:ACCTCCG	ACCTCCT:ACCTCCT	CAAC:CAAC	CGAG:CGAG	CGAC:CGAC	CAAAAAGAGT:CAAAAAGAGT	CAAAGAGT:CAAAAGAGT	NA	AA:CG	AG:CG	GTTAC:GTTAC	ATTGA:ATTGA	GGA:AGA	GATATATATC:GGTATATATC	AC:AC	GCA:GAA	GCG:GAA	ATAAAATAG:ATAAAATAG	CA:CA	CG:CG	CAT:CAT	CCT:CCT	GGA:GGAAATGGAAATAGA	CAACT:CAACT	TTTTTAACC:TCTTCAAAG	GC:GCTTTGCC	TAAAAGAAGGT:TAAAAAGAAGGT	ATTATAA:ATCTTATAA	AA	TCCCCTTCTCTCTCTG:TCCCCTTCTCTCTCTG	ATTAAA:ATTAAA	TAAGAAGT:TAAGAAGT	G:G	A:A	A:G	A:G	A:A	G:G	A:A	G:G
Loch Ness	TAA:TAC	ACTCCCCCA:ACTCCCCCA	ACTCCCCCA:ACTCCCCCA	TT:TGCTAAAT	TGCTAAATTGAAAGGCTAATTACCATACGTGGTGGAAGATTGTAATCTCCAACAAA:TTTAG	TCTTCAAAGAAG:TCTTCAAAGAAG	CT:CT	CT:CT	TACT:TACT	ACCTCCG:ACCTCCG	NA	CAAC:CAAC	CGAG:CGAG	CGAC:CGAC	CAAAAAGAGT:CAAAAAGAGT	CAAAAGAGT:CAAAAGAGT	NA	AA:CG	AG:AG	GTTAC:GTTAC	ATTGA:ATGA	GGA:GGA	NA	AC:GT	GAA:GAA	GAA:GAA	ATAAAATAG:ATAAAATAG	CA:CA	CG:CG	CAT:CAT	CCT:CCT	GGA:GGA	CAACT:CAACT	TCTTCAAAG:TCTTCAAAG	GC:GC	TAAAAGAAGGT:TAAAAGAAGGT	ATCTTATAA:ATCTTATAA	AA	TCCCCTTCTCTCTCCG:TCCCCTTCTCTCTCCG	ATTAAA:ATTAAA	TAAGAAGT:TAAGAAGT	G:G	A:A	NA	A:G	T:A	G:G	A:A	G:G
Marion	TAA:TAA	ACTCCCCCA:ACTCCCCCA	ACTCCCCCA:ACTCCCCCA	TGCTAAAT:TGCTAAAT	TGCTAAATTGAAAGGCTAATTACCATACGTGGTGGAAGATTGTAATCTCCAACAAA:TGCTAAATTGAAAGGCTAATTACCATACGTGGTGGAAGATTGTAATCTCCAACAAA	TTTTTAACCAAG:TCTTCAAAGAAG	TC:CT	TT:CT	TACT:TACT	ACCTCCG:GCCTTCA	ACCTCCT:GCCTTCA	CAAC:CAAC	CGAG:CGAG	CGAC:CGAC	CAAAAAGAGT:CAAAAAGAGT	CAAAGAGT:CAAAAGAGT	CGAAAGAGT:CGAAAGAGT	AA:CG	AG:CG	GTTAC:GTTAC	ATTGA:ATTGA	GGA:AGA	GATATATATC:GGTATATATC	AC:GT	GCA:GAA	GCG:GAA	ATAAAATAG:ATGAAATAG	CA:TG	CG:TG	CAT:GAA	CCT:GAA	GGA:GGAAATGGAAATAGA	CAACT:CAACT	TTTTTAACC:TCTTCAAAG	GC:GC	TAAAAGAAGGT:TAAAAAGAAGGT	ATTATAA:ATCTTATAA	AA	TCCCCTTCTCTCTCTG:TCCCCTTCTCTCTCTG	ATTAAA:ATTAAA	TAAGAAGT:TAAGAAGT	G:G	A:A	A:G	G:G	A:A	G:G	A:A	G:G
Metolius	TAA:TAA	ACTCCCCCA:ACTCCCCCA	ACTCCCCCA:ACTCCCCCA	TGCTAAAT:TGCTAAAT	TGCTAAATTGAAAGGCTAATTACCATACGTGGTGGAAGATTGTAATCTCCAACAAA:TGCTAAATTGAAAGGCTAATTACCATACGTGGTGGAAGATTGTAATCTCCAACAAA	TTTTTAACCAAG:TCTTCAAAGAAG	TC:CT	TT:CT	TAAA:TACT	ACCTCCG:ACCTCCG	ACCTCCT:ACCTCCT	CAAC:CAAC	CGAG:CGAG	CGAC:CGAC	CAAAAAGAGT:CAAAAAGAGT	CAAAGAGT:CAAAAGAGT	NA	AA:CG	AG:AG	GTTAC:GTTAC	ATTGA:ATTGA	GGA:AGA	GATATATATC:GGTATATATC	AC:GT	GCA:GAA	GCG:GAA	ATAAAATAG:ATGAAATAG	CA:TG	CG:TG	CAT:GAA	CCT:GAA	GGA:GGAAATGGAAATAGA	CAACT:CAACT	TTTTTAACC:TCTTCAAAG	GC:GC	NA	ATTATAA:ATCTTATAA	AA	TCCCCTTCTCTCTCTG:TCCCCTTCTCTCTCTG	ATTAAA:ATTAAA	TAAGAAGT:TAAGAAGT	G:G	A:A	A:G	A:G	A:A	G:G	A:A	G:G
Nightfall	TAA:TAA	ACTCCCCCA:ACTCCCCCA	ACTCCCCCA:ACTCCCCCA	TGCTAAAT:TGCTAAAT	TGCTAAATTGAAAGGCTAATTACCATACGTGGTGGAAGATTGTAATCTCCAACAAA:TGCTAAATTGAAAGGCTAATTACCATACGTGGTGGAAGATTGTAATCTCCAACAAA	NA	CT:CT	CT:CT	TACT:TACT	ACCTCCG:GCCTTCA	ACCTCCT:GCCTTCA	CAAC:CAAC	CGAG:CGAG	CGAC:CGAC	CAAAAAGAGT:CAAAAAGAGT	CAAAGAGT:CAAAAGAGT	CGAAAGAGT:CGAAAGAGT	AA:CG	AG:CG	GTTAC:GTTAC	ATTGA:ATTGA	NA	GATATATATC:GGTATATATC	AC:AC	GCA:GAA	GCG:GAA	ATAAAATAG:ATAAAATAG	NA	NA	CAT:CAT	CCT:CCT	GGA:GGAAATGGAAATAGA	CAACT:CAACT	TCTTCAAAG:TCTTCAAAG	GC:GCTTTGCC	TAAAAGAAGGT:TAAAAAGAAGGT	ATTATAA:ATCTTATAA	AA	TCCCCTTCTCTCTCTG:TCCCCTTCTCTCTCTG	ATTAAA:ATTAAA	TAAGAAGT:TAAGAAGT	G:G	A:A	A:G	A:G	A:A	G:G	A:A	G:G
NZ9629-1	TAA:TAA	ACTCCCCCA:ACTCCCCCA	ACTCCCCCA:ACTCCCCCA	TGCTAAAT:TGCTAAAT	TGCTAAATTGAAAGGCTAATTACCATACGTGGTGGAAGATTGTAATCTCCAACAAA:TGCTAAATTGAAAGGCTAATTACCATACGTGGTGGAAGATTGTAATCTCCAACAAA	TTTTTAACCAAG:TCTTCAAAGAAG	TC:CT	TT:CT	NA	ACCTCCG:ACCTCCG	ACCTCCT:ACCTCCT	CAAC:CAAC	CGAG:CGAG	CGAC:CGAC	CAAAAAGAGT:CAAAAAGAGT	CAAAAGAGT:CAAAAGAGT	CGAAAGAGT:CGAAAGAGT	AA:CG	AG:CG	GTTAC:GTTAC	ATTGA:ATTGA	GGA:AGA	GATATATATC:GGTATATATC	AC:AC	GCA:GAA	GCG:GAA	ATAAAATAG:ATGAAATAG	CA:TG	CG:TG	CAT:GAA	CCT:GAA	GGA:GGAAATGGAAATAGA	CAACT:CAACT	TTTTTAACC:TCTTCAAAG	GC:GC	TAAAAGAAGGT:TAAAAAGAAGGT	ATTATAA:ATCTTATAA	AA	TCCCCTTCTCTCTCTG:TCCCCTTCTCTCTCTG	ATTAAA:ATTAAA	TAAGAAGT:TAAGAAGT	G:G	A:A	A:G	A:G	A:A	G:G	A:A	G:G
Obsidian	TAA:TAA	ACTCCCCCA:ACTCCCCCA	ACTCCCCCA:ACTCCCCCA	TGCTAAAT:TGCTAAAT	TGCTAAATTGAAAGGCTAATTACCATACGTGGTGGAAGATTGTAATCTCCAACAAA:TGCTAAATTGAAAGGCTAATTACCATACGTGGTGGAAGATTGTAATCTCCAACAAA	TTTTTAACCAAG:TCTTCAAAGAAG	TC:CT	TT:CT	TACT:TACT	ACCTCCG:GCCTTCA	ACCTCCT:GCCTTCA	CAAC:GGAG	CGAG:GGAG	CGAC:GGAG	CAAAAAGAGT:CAAAAAGAGT	CAAAAGAGT:CAAAAGAGT	CGAAAGAGT:CGAAAGAGT	AA:CG	AG:CG	GTTAC:GTTAC	ATTGA:ATTGA	GGA:AGA	GATATATATC:GATATATATC	AC:AC	GCA:GAA	GCG:GAA	ATAAAATAG:ATGAAATAG	CA:TG	CG:TG	CAT:GAA	CCT:GAA	GGA:GGAAATGGAAATAGA	CAACT:CAACT	TTTTTAACC:TCTTCAAAG	GC:GC	TAAAAGAAGGT:TAAAAAGAAGGT	ATTATAA:ATCTTATAA	AA	TCCCCTTCTCTCTCTG:TCCCCTTCTCTCTCTG	ATTAAA:ATTAAA	TAAGAAGT:TAAGAAGT	G:T	T:T	A:G	G:G	A:A	G:G	A:A	G:C
Osage	TAC:TAC	ACCCCCCA:ACTCCCCCA	ACCCCCCCA:ACTCCCCCA	TGCTAAAT:TGCTAAAT	TGCTAAATTGAAAGGCTAATTACCATACGTGGTGGAAGATTGTAATCTCCAACAAA:TGCTAAATTGAAAGGCTAATTACCATACGTGGTGGAAGATTGTAATCTCCAACAAA	TTTTTAACCAAG:TCTTCAAAGAAG	CT:CT	CT:CT	TACT:TACT	ACCTCCG:ACCTCCG	NA	CAAC:CAAC	CGAG:CGAG	CGAC:CGAC	CAAAAAGAGT:CAAAAAGAGT	CAAAAGAGT:CAAAAGAGT	CGAAAGAGT:CGAAAGAGT	AA:CG	AG:AG	GTTAC:GTTAC	ATTGA:ATGA	GGA:GGA	GATATATATC:GGTATATATC	AC:GT	GAA:GAA	GAA:GAA	ATAAAATAG:ATAAAATAG	CA:CA	CG:CG	CAT:CAT	CCT:CCT	GGA:GGA	CAACT:CAACT	TTTTTAACC:TCTTCAAAG	NA	TAAAAGAAGGT:TAAAAGAAGGT	ATCTTATAA:ATCTTATAA	AA	TCCCCTTCTCTCTCCG:TCCCCTTCTCTCTCCG	ATTAAA:ATTAAA	TAAGAAGT:TAAGAAGT	G:G	A:A	A:A	A:G	T:A	G:G	A:A	G:G
Pacific	TAA:TAA	ACTCCCCCA:ACTCCCCCA	ACTCCCCCA:ACTCCCCCA	TGCTAAAT:TGCTAAAT	TGCTAAATTGAAAGGCTAATTACCATACGTGGTGGAAGATTGTAATCTCCAACAAA:TGCTAAATTGAAAGGCTAATTACCATACGTGGTGGAAGATTGTAATCTCCAACAAA	TTTTTAACCAAG:TCTTCAAAGAAG	TC:CT	TT:CT	TACT:TACT	ACCTCCG:GCCTTCA	ACCTCCT:GCCTTCA	CAAC:GGAG	CGAG:GGAG	CGAC:GGAG	CAAAAAGAGT:CAAAAAGAGT	CAAAGAGT:CAAAAGAGT	NA	CG:CG	AG:CG	GTTAC:GTAAC	ATTGA:ATTGA	GGA:AGA	GATATATATC:GGTATATATC	AC:AC	GCA:GAA	GCG:GAA	ATAAAATAG:ATAAAATAG	CA:CA	CG:CG	CAT:CAT	CCT:CCT	GGAAATGGAAATAGA:GGAAATGGAAATAGA	CAACT:CAACT	TTTTTAACC:TCTTCAAAG	GC:GC	TAAAAGAAGGT:TAAAAAGAAGGT	ATTATAA:ATCTTATAA	AA	TCCCCTTCTCTCTCTG:TCCCCTTCTCTCTCTG	ATTAAA:ATTAAA	TAAGAAGT:TAAGAAGT	G:T	T:T	A:G	G:G	A:A	G:G	A:A	G:C
Prime-Ark® 45	NA	ACCCCCCA:ACTCCCCCA	NA	NA	TGCTAAATTGAAAGGCTAATTACCATACGTGGTGGAAGATTGTAATCTCCAACAAA:TGCTAAATTGAAAGGCTAATTACCATACGTGGTGGAAGATTGTAATCTCCAACAAA	NA	NA	NA	TACT:TACT	NA	NA	NA	NA	NA	NA	NA	NA	NA	AG:AG	GTTAC:GTTAC	NA	NA	NA	NA	GAA:GAA	GAA:GAA	ATAAAATAG:ATAAAATAG	NA	NA	NA	NA	GGA:GGA	NA	NA	NA	NA	NA	AA	TCCCCTTCTCTCTCCG:TCCCCTTCTCTCTCCG	NA	TAAGAAGT:TAAGAAGT	G:G	A:A	NA	G:G	A:A	NA	A:A	G:G
Prime-Ark® Traveler	TAC:TAC	ACTCCCCCA:ACTCCCCCA	ACTCCCCCA:ACTCCCCCA	TT:TGCTAAAT	NA	TTTTTAACCAAG:TTTTTAACCAAG	CT:CT	CT:CT	TACT:TACT	ACCTCCG:ACCTCCG	NA	CAAC:CAAC	CGAG:CGAG	CGAC:CGAC	CAAAAAGAGT:CAAAAAGAGT	CAAAAGAGT:CAAAAGAGT	CGAAAGAGT:CGAAAGAGT	AA:CG	AG:AG	GTTAC:GTTAC	ATTGA:ATGA	GGA:GGA	GATATATATC:GATATATATC	AC:AC	GAA:GAA	GAA:GAA	ATAAAATAG:ATAAAATAG	CA:CA	CG:CG	CAT:CAT	CCT:CCT	GGA:GGA	CAACT:CAACT	TTTTTAACC:TCTTCAAAG	NA	TAAAAGAAGGT:TAAAAGAAGGT	ATCTTATAA:ATCTTATAA	AA	TCCCCTTCTCTCTCCG:TCCCCTTCTCTCTCCG	ATTAAA:ATTAAA	TAAGAAGT:TAGAAGT	G:G	A:A	A:A	A:G	T:A	G:G	A:A	G:G
Silvan	TAA:TAA	ACTCCCCCA:ACTCCCCCA	ACTCCCCCA:ACTCCCCCA	TGCTAAAT:TGCTAAAT	TGCTAAATTGAAAGGCTAATTACCATACGTGGTGGAAGATTGTAATCTCCAACAAA:TGCTAAATTGAAAGGCTAATTACCATACGTGGTGGAAGATTGTAATCTCCAACAAA	TTTTTAACCAAG:TCTTCAAAGAAG	TC:CT	TT:CT	TACT:TACT	ACCTCCG:GCCTTCA	GCCTTCA:GCCTTCA	CAAC:CAAC	CGAG:CGAG	CGAC:CGAC	CAAAAAGAGT:CAAAAAGAGT	CAAAGAGT:CAAAAGAGT	CGAAAGAGT:CGAAAGAGT	AA:CG	AG:CG	GTTAC:GTTAC	ATTGA:ATTGA	GGA:AGA	GATATATATC:GGTATATATC	AC:AC	GCA:GAA	GCG:GAA	ATAAAATAG:ATGAAATAG	CA:TG	CG:TG	CAT:GAA	NA	GGA:GGAAATGGAAATAGA	CAACT:CAACT	TTTTTAACC:TCTTCAAAG	GC:GCTTTGCC	TAAAAGAAGGT:TAAAAAGAAGGT	ATTATAA:ATCTTATAA	AA	TCCCCTTCTCTCTCTG:TCCCCTTCTCTCTCTG	ATTAAA:ATTAAA	TAAGAAGT:TAAGAAGT	G:G	A:A	A:G	A:G	A:A	G:G	A:A	G:G
Tupy	NA	ACCCCCCA:ACTCCCCCA	ACCCCCCCA:ACTCCCCCA	TGCTAAAT:TGCTAAAT	TGCTAAATTGAAAGGCTAATTACCATACGTGGTGGAAGATTGTAATCTCCAACAAA:TGCTAAATTGAAAGGCTAATTACCATACGTGGTGGAAGATTGTAATCTCCAACAAA	TTTTTAACCAAG:TCTTCAAAGAAG	CT:CT	CT:CT	TACT:TACT	ACCTCCG:ACCTCCG	ACCTCCT:ACCTCCT	CAAC:CAAC	CGAG:CGAG	CGAC:CGAC	CAAAAAGAGT:CAAAAAGAGT	CAAAAGAGT:CAAAAGAGT	NA	AA:CG	AG:AG	GTTAC:GTTAC	ATTGA:ATTGA	GGA:GGA	GATATATATC:GATATATATC	AC:AC	GAA:GAA	GAA:GAA	ATAAAATAG:ATAAAATAG	CA:CA	CG:CG	CAT:CAT	CCT:CCT	GGA:GGA	CAACT:CAAACT	TTTTTAACC:TCTTCAAAG	GC:GCTTTGCC	TAAAAGAAGGT:TAAAAGAAGGT	ATCTTATAA:ATCTTATAA	AA	TCCCCTTCTCTCTCCG:TCCCCTTCTCTCTCCG	ATTAAA:ATTAAA	TAAGAAGT:TAGAAGT	G:G	A:A	A:A	A:G	T:A	G:G	A:A	G:G
Waldo	TAA:TAA	ACTCCCCCA:ACTCCCCCA	ACTCCCCCA:ACTCCCCCA	TGCTAAAT:TGCTAAAT	TGCTAAATTGAAAGGCTAATTACCATACGTGGTGGAAGATTGTAATCTCCAACAAA:TGCTAAATTGAAAGGCTAATTACCATACGTGGTGGAAGATTGTAATCTCCAACAAA	TTTTTAACCAAG:TCTTCAAAGAAG	TC:CT	TT:CT	TACT:TACT	ACCTCCG:GCCTTCA	ACCTCCT:GCCTTCA	CAAC:CAAC	CGAG:CGAG	CGAC:CGAC	CAAAAAGAGT:CAAAAAGAGT	CAAAGAGT:CAAAAGAGT	CGAAAGAGT:CGAAAGAGT	AA:CG	AG:CG	GTTAC:GTTAC	ATTGA:ATTGA	GGA:AGA	GATATATATC:GGTATATATC	AC:AC	GCA:GAA	GCG:GAA	ATAAAATAG:ATAAAATAG	NA	NA	CAT:CAT	CCT:CCT	GGA:GGAAATGGAAATAGA	CAACT:CAACT	TTTTTAACC:TCTTCAAAG	GC:GCTTTGCC	TAAAAGAAGGT:TAAAAGAAGGT	ATTATAA:ATCTTATAA	AA	TCCCCTTCTCTCTCTG:TCCCCTTCTCTCTCTG	ATTAAA:ATTAAA	TAAGAAGT:TAAGAAGT	G:G	A:A	A:G	A:G	A:A	G:G	A:A	G:G
[truncated: 35 more columns]
